# Supplementary material
Source: PubMed Central journal article supplement (PMC2897441)
Supplement: supp_76_13_4421__1.pdf [file supp_76_13_4421__1.pdf]

**SUPPLEMENTAL TABLE S1.** Oligonucleotide primers used for QPCR. *xyrA*: D-xylose reductase; *pepC*: serine proteinase; *PRE7* and *CDC48* refer to the *S. cerevisiae* genes encoding the  $\beta_6$  subunit of the 20S proteasome and the ER retrotranslocation ATPase, respectively.

| Forward primer (5'-3') | Reverse primer (5'-3') | Target gene                                               |
|------------------------|------------------------|-----------------------------------------------------------|
| TCGAGTTGAGTGTGCAGAATG  | ACTCTTGGGGATAACAGCAATC | <i>xyrA</i> (An01g03740)                                  |
| TCTGGCACCATGTCTGATGT   | CCCTTGAATCCCTTGACCTT   | <i>pepC</i> (An07g03880)                                  |
| GCTTGACGAGGATGGTAAG    | ATCCAGGAACGGCATGATAA   | homologue of yeast <i>PRE7</i> (An18g06700)               |
| TGTGCTGCCAACTTCATCTC   | ATCCAGGAAAACAACGCAAG   | homologue of yeast <i>CDC48</i> (An04g09170)              |
| AGCATTACGCTGACTTGACG   | AGGTGGACCAGTTGGTGATT   | control exogenous gene<br>(kanamycin/neomycin resistance) |
