# Supplementary material
Source: PubMed Central journal article supplement (PMC2897441)
Supplement: supp_76_13_4421__2.pdf [file supp_76_13_4421__2.pdf]

SUPPLEMENTAL TABLE S2. Identified proteins and normalized relative abundance calculated by NSAF. Proteins are ordered by differential presence on microsomes (decreasing G-score values). Blue cells: over-represented on sorbitol; orange cells: over-represented on xylose. BR: biological replicate; NSAF: normalized spectral abundance factor; Sorb: sorbitol addition; TMD: transmembrane domains; Xyl.: xylose addition.

| LOCUS TAG  | NCBI/JGI DESCRIPTION                                                                                                   | TMD | LENGTH AMINO ACIDS | SPECTRAL COUNTS |     |      |     | NSAF.10 <sup>4</sup> |      | G-score |
|------------|------------------------------------------------------------------------------------------------------------------------|-----|--------------------|-----------------|-----|------|-----|----------------------|------|---------|
|            |                                                                                                                        |     |                    | Sorb.           |     | Xyl. |     | Sorb                 | Xyl. |         |
|            |                                                                                                                        |     |                    | BR1             | BR2 | BR1  | BR2 |                      |      |         |
| An18g06700 | strong similarity to proteasome 20S subunit Pre7 - <i>Saccharomyces cerevisiae</i>                                     | 0   | 260                | 0               | 0   | 14   | 17  | 0.5                  | 21.9 | 26.20   |
| An04g09170 | strong similarity to valosin-containing protein like AAA-ATPase Cdc48 - <i>Saccharomyces cerevisiae</i>                | 0   | 820                | 3               | 1   | 93   | 2   | 1.4                  | 21.0 | 20.47   |
| An01g09960 | xylosidase xlnD - <i>Aspergillus niger</i>                                                                             | 0   | 804                | 0               | 0   | 41   | 19  | 0.2                  | 13.6 | 17.28   |
| An15g00510 | strong similarity to proteasome 20S subunit C2 - <i>Rattus norvegicus</i>                                              | 0   | 262                | 0               | 0   | 10   | 11  | 0.5                  | 14.8 | 16.83   |
| An01g03740 | D-xylose reductase xyrA - <i>Aspergillus niger</i>                                                                     | 0   | 319                | 0               | 0   | 20   | 2   | 0.4                  | 12.7 | 14.57   |
| An10g00820 | strong similarity to carboxyphosphoenolpyruvate phosphonmutase bcpA - <i>Streptomyces hygroscopicus</i>                | 0   | 299                | 20              | 32  | 104  | 43  | 45.7                 | 89.0 | 14.17   |
| An16g02130 | similarity to novel cell death-regulatory protein GRIM19 - <i>Mus musculus</i>                                         | 0   | 109                | 0               | 1   | 5    | 7   | 3.6                  | 20.7 | 13.33   |
| An02g10790 | strong similarity to proteasome 20S subunit Pre6 - <i>Saccharomyces cerevisiae</i>                                     | 0   | 270                | 0               | 0   | 8    | 8   | 0.5                  | 11.0 | 11.95   |
| An02g12510 | strong similarity to plasma membrane H(+)-ATPase pmaA - <i>Aspergillus nidulans</i> [putative frameshift]              | 9   | 990                | 6               | 14  | 50   | 76  | 5.4                  | 23.1 | 11.81   |
| An04g05640 | mitochondrial proton-pumping NADH:ubiquinone reductase nuo51 - <i>Aspergillus niger</i>                                | 0   | 496                | 1               | 11  | 32   | 35  | 6.6                  | 24.5 | 11.08   |
| An01g12210 | strong similarity to core protein I of ubiquinol--cytochrome-c reductase $\beta$ -MPP - <i>Neurospora crassa</i>       | 0   | 479                | 9               | 16  | 56   | 42  | 13.9                 | 37.1 | 11.00   |
| An07g08300 | cyclophilin-like peptidyl prolyl cis-trans isomerase cypA - <i>Aspergillus niger</i>                                   | 0   | 174                | 14              | 29  | 13   | 18  | 65.1                 | 32.7 | 10.95   |
| An16g03590 | strong similarity to phosphatidylinositol-phosphatidylcholine transfer protein Sec14 - <i>Saccharomyces cerevisiae</i> | 0   | 322                | 8               | 7   | 1    | 1   | 12.5                 | 1.4  | 10.22   |
| An01g03820 | strong similarity to ER protein-translocation complex subunit Sbh2 - <i>Saccharomyces cerevisiae</i>                   | 1   | 127                | 7               | 5   | 1    | 4   | 25.6                 | 7.8  | 9.99    |
| An11g06720 | strong similarity to proteasome 20S subunit Pre9 - <i>Saccharomyces cerevisiae</i>                                     | 0   | 255                | 0               | 0   | 7    | 6   | 0.5                  | 9.6  | 9.91    |
| An07g09990 | strong similarity to heat shock protein 70 hsp70 - <i>Ajellomyces capsulatus</i> [putative frameshift]                 | 0   | 637                | 89              | 88  | 61   | 80  | 72.5                 | 40.1 | 9.49    |
| An02g12270 | strong similarity to glycine-rich RNA-binding protein grrbp2 - <i>Euphorbia esula</i>                                  | 0   | 116                | 6               | 4   | 3    | 1   | 23.6                 | 7.0  | 9.48    |
| An05g02300 | similarity to secreted protein SEQ ID NO:127 from patent WO200061779-A1 - <i>Homo sapiens</i>                          | 1   | 290                | 0               | 2   | 17   | 5   | 2.2                  | 14.0 | 9.47    |
| An02g07040 | strong similarity to proteasome 20S subunit Scl1 - <i>Saccharomyces cerevisiae</i>                                     | 0   | 244                | 1               | 0   | 6    | 10  | 1.6                  | 12.2 | 9.23    |
| An16g04770 | strong similarity to aldo/keto reductase Gcy1 - <i>Saccharomyces cerevisiae</i>                                        | 0   | 319                | 12              | 8   | 4    | 2   | 16.7                 | 3.7  | 9.04    |
| An18g05980 | strong similarity to GTP-binding protein rho1p - <i>Schizosaccharomyces pombe</i>                                      | 0   | 193                | 11              | 13  | 47   | 18  | 33.0                 | 61.2 | 8.56    |
| An18g06800 | strong similarity to proteasome 20S subunit Pre10 - <i>Saccharomyces cerevisiae</i>                                    | 0   | 274                | 3               | 0   | 8    | 15  | 3.3                  | 15.5 | 8.52    |
| An07g02010 | strong similarity to proteasome 20S subunit Pre8 - <i>Saccharomyces cerevisiae</i>                                     | 0   | 279                | 3               | 0   | 9    | 14  | 3.3                  | 15.2 | 8.36    |

|            |                                                                                                                 |   |      |     |    |    |     |      |      |      |
|------------|-----------------------------------------------------------------------------------------------------------------|---|------|-----|----|----|-----|------|------|------|
| An07g07390 | strong similarity to subunit IV of cytochrome c oxidase Cox4 - <i>Saccharomyces cerevisiae</i>                  | 0 | 194  | 2   | 5  | 15 | 14  | 10.1 | 27.4 | 8.36 |
| An14g03400 | ornithine carbamoyltransferase argB - <i>Aspergillus niger</i> [putative sequencing error]                      | 0 | 371  | 8   | 15 | 2  | 6   | 16.5 | 4.1  | 7.92 |
| An12g05040 | similarity to hypothetical protein lin-10 - <i>Caenorhabditis elegans</i> -                                     | 0 | 99   | 1   | 2  | 0  | 0   | 9.2  | 0.9  | 7.90 |
| An18g00950 | weak similarity to hypothetical acetyltransferase MK0549 - <i>Methanopyrus kandle</i> -                         | 0 | 251  | 8   | 7  | 5  | 0   | 16.1 | 4.0  | 7.86 |
| An06g01890 | similarity to histidine triad protein Hnt1 - <i>Saccharomyces cerevisiae</i> -                                  | 0 | 135  | 3   | 4  | 1  | 1   | 14.5 | 3.3  | 7.49 |
| An02g03400 | strong similarity to proteasome 20S subunit Pup2 - <i>Saccharomyces cerevisiae</i>                              | 0 | 246  | 0   | 0  | 4  | 6   | 0.5  | 7.7  | 7.48 |
| An01g03570 | strong similarity to cytochrome-b5 reductase Mcr1 - <i>Saccharomyces cerevisiae</i>                             | 0 | 322  | 6   | 14 | 36 | 28  | 16.6 | 36.1 | 7.44 |
| An01g12420 | strong similarity to cytoplasmic ribosomal protein of the large subunit L17 - <i>Rattus norvegicus</i>          | 0 | 184  | 27  | 14 | 14 | 19  | 58.7 | 32.8 | 7.40 |
| An07g03070 | strong similarity to mitochondrial carrier protein ARALAR2 - <i>Homo sapiens</i>                                | 0 | 695  | 5   | 20 | 58 | 38  | 9.5  | 25.0 | 7.20 |
| An18g05020 | strong similarity to cytoplasmic ribosomal protein of the large subunit Rpl27 - <i>Saccharomyces cerevisiae</i> | 0 | 135  | 9   | 13 | 9  | 7   | 43.4 | 22.0 | 7.08 |
| An09g06670 | strong similarity to suppressor gene of mitochondrial histone Yhm2 - <i>Saccharomyces cerevisiae</i>            | 0 | 316  | 0   | 6  | 13 | 17  | 5.4  | 17.4 | 6.72 |
| An07g10010 | strong similarity to mitochondrial carrier protein Yhm1 - <i>Saccharomyces cerevisiae</i>                       | 0 | 309  | 2   | 7  | 18 | 19  | 8.0  | 21.9 | 6.71 |
| An09g03300 | xylosidase AxlA, with strong similarity to $\alpha$ -xylosidase XylS - <i>Sulfolobus solfataricus</i>           | 0 | 736  | 0   | 0  | 13 | 10  | 0.2  | 5.8  | 6.64 |
| An08g10530 | strong similarity to mitochondrial aconitate hydratase Aco1 - <i>Saccharomyces cerevisiae</i>                   | 0 | 777  | 4   | 5  | 48 | 8   | 3.2  | 13.1 | 6.50 |
| An08g08740 | strong similarity to cytoplasmic ribosomal protein of the small subunit S18 - <i>Homo sapiens</i>               | 0 | 155  | 19  | 20 | 13 | 21  | 66.3 | 40.2 | 6.50 |
| An04g02470 | strong similarity to GTP-binding protein ypt5p - <i>Schizosaccharomyces pombe</i>                               | 0 | 218  | 0   | 0  | 6  | 2   | 0.6  | 7.0  | 6.39 |
| An11g11030 | strong similarity to cytoplasmic ribosomal protein of the large subunit L28 - <i>Saccharomyces cerevisiae</i>   | 0 | 149  | 10  | 10 | 9  | 5   | 35.8 | 17.6 | 6.37 |
| An07g04570 | strong similarity to hex1 - <i>Aspergillus nidulans</i> [putative frameshift]                                   | 0 | 216  | 19  | 22 | 14 | 19  | 50.0 | 28.0 | 6.31 |
| An17g02330 | strong similarity to phosphoglycerate dehydrogenase serA - <i>Escherichia coli</i>                              | 0 | 480  | 18  | 20 | 6  | 14  | 20.9 | 7.7  | 6.31 |
| An01g06180 | strong similarity to cytochrome c1 of ubiquinol--cytochrome c reductase CYT-1 - <i>Neurospora crassa</i>        | 0 | 316  | 1   | 21 | 28 | 36  | 18.5 | 36.8 | 6.16 |
| An08g01930 | similarity to precursor of 3-oxoacyl-(acyl-carrier-protein) reductase - <i>Cuphea lanceolata</i>                | 0 | 338  | 0   | 0  | 10 | 1   | 0.4  | 6.1  | 6.12 |
| An01g02500 | strong similarity to thioredoxin - <i>Aspergillus nidulans</i>                                                  | 0 | 108  | 5   | 4  | 1  | 4   | 22.9 | 9.2  | 6.05 |
| An04g02070 | strong similarity to clathrin heavy chain - <i>Bos taurus</i>                                                   | 0 | 1711 | 108 | 98 | 34 | 108 | 31.4 | 15.0 | 5.91 |
| An11g03340 | acid $\alpha$ -amylase - <i>Aspergillus niger</i>                                                               | 0 | 505  | 1   | 1  | 22 | 1   | 1.3  | 8.4  | 5.83 |
| An06g01830 | strong similarity to cytosolic leucine--tRNA ligase - <i>Neurospora crassa</i>                                  | 0 | 1126 | 2   | 1  | 41 | 3   | 0.8  | 7.1  | 5.78 |
| An12g00020 | strong similarity to D-lactate dehydrogenase dld - <i>Kluyveromyces lactis</i>                                  | 0 | 601  | 0   | 0  | 14 | 3   | 0.2  | 5.3  | 5.76 |
| An09g03950 | strong similarity to cytosolic tryptophan--tRNA ligase Wrs1 - <i>Saccharomyces cerevisiae</i> -                 | 0 | 433  | 8   | 6  | 0  | 3   | 8.7  | 1.5  | 5.74 |
| An14g00010 | secretion related GTPase srgA - <i>Aspergillus niger</i>                                                        | 0 | 206  | 0   | 0  | 6  | 1   | 0.6  | 6.6  | 5.70 |
| An14g04080 | strong similarity to iron-sulfur subunit of ubiquinol--cytochrome c reductase rip1p - <i>S.pombe</i>            | 0 | 238  | 6   | 9  | 28 | 16  | 16.9 | 33.7 | 5.66 |
| An15g01710 | strong similarity to F1Fo-ATP synthase subunit 7 ATP7 - <i>Kluyveromyces lactis</i>                             | 0 | 173  | 2   | 12 | 15 | 23  | 21.8 | 40.1 | 5.51 |
| An05g00140 | similarity to signal recognition particle receptor $\beta$ chain Srp102 - <i>Saccharomyces cerevisiae</i>       | 1 | 320  | 11  | 20 | 11 | 9   | 25.6 | 11.6 | 5.45 |
| An02g11940 | strong similarity to aminopeptidase METPRO02 from patent EP939131-A2 - <i>Homo sapiens</i>                      | 0 | 497  | 3   | 0  | 11 | 14  | 1.8  | 9.3  | 5.43 |
| An08g04240 | strong similarity to alternative NADH:ubiquinone reductase NDH2 - <i>Yarrowia lipolytica</i>                    | 0 | 567  | 1   | 4  | 21 | 12  | 2.5  | 10.7 | 5.40 |
| An07g01290 | strong similarity to xylitol dehydrogenase xdh - <i>Galactocandida mastotermitis</i>                            | 0 | 369  | 24  | 24 | 23 | 13  | 34.2 | 17.8 | 5.23 |
| An02g13840 | strong similarity to cytoplasmic ribosomal protein of the small subunit S9 - <i>Homo sapiens</i>                | 0 | 193  | 24  | 21 | 24 | 17  | 61.4 | 38.8 | 5.13 |
| An02g13850 | strong similarity to cytoplasmic ribosomal protein of the large subunit Urp1 - <i>Saccharomyces cerevisiae</i>  | 0 | 158  | 7   | 5  | 5  | 2   | 20.6 | 8.6  | 5.11 |
| An11g07020 | similarity to hypothetical protein BAB52928.1 - <i>Mesorhizobium loti</i>                                       | 0 | 260  | 0   | 1  | 10 | 1   | 1.5  | 8.0  | 4.86 |
| An09g06850 | strong similarity to 78 kD subunit of NADH:ubiquinone reductase NDUFS1 - <i>Bos taurus</i>                      | 0 | 737  | 6   | 42 | 59 | 73  | 17.1 | 32.4 | 4.80 |
| An07g02180 | strong similarity to dihydrolipoamide acetyltransferase Lat1 - <i>Saccharomyces cerevisiae</i>                  | 0 | 675  | 7   | 71 | 31 | 27  | 30.3 | 15.6 | 4.75 |
| An01g07200 | similarity to N-acetylglucosaminyltransferases chain p110 - <i>Rattus norvegicus</i>                            | 0 | 833  | 0   | 0  | 18 | 1   | 0.2  | 4.2  | 4.72 |

|            |                                                                                                                          |   |      |     |     |     |     |      |      |      |
|------------|--------------------------------------------------------------------------------------------------------------------------|---|------|-----|-----|-----|-----|------|------|------|
| An11g00890 | strong similarity to hypothetical protein Afu6g10450 - <i>Aspergillus fumigatus</i>                                      | 0 | 192  | 1   | 0   | 2   | 7   | 2.0  | 8.9  | 4.68 |
| An08g01740 | strong similarity to uronate dehydrogenase from patent DE19604798-A1 - <i>Saccharomyces cerevisiae</i>                   | 0 | 298  | 0   | 0   | 7   | 1   | 0.4  | 5.1  | 4.67 |
| An12g04940 | strong similarity to mitochondrial heat shock protein Hsp60 - <i>Saccharomyces cerevisiae</i>                            | 0 | 587  | 22  | 38  | 35  | 111 | 26.8 | 45.0 | 4.66 |
| An07g06760 | strong similarity to cytoplasmic ribosomal protein of the small subunit S20 - <i>Saccharomyces cerevisiae</i> -          | 0 | 116  | 3   | 2   | 1   | 1   | 12.3 | 3.9  | 4.63 |
| An11g04870 | strong similarity to ribonucleoprotein autoantigen Sm-D - <i>Homo sapiens</i>                                            | 0 | 121  | 0   | 0   | 3   | 1   | 1.1  | 6.7  | 4.54 |
| An04g02460 | strong similarity to heart muscle protein mitofilin HMP - <i>Homo sapiens</i>                                            | 1 | 631  | 1   | 15  | 28  | 31  | 6.8  | 17.0 | 4.52 |
| An14g01010 | strong similarity to cytoplasmic ribosomal protein of the large subunit L7 - <i>Saccharomyces cerevisiae</i>             | 0 | 273  | 26  | 20  | 27  | 13  | 44.3 | 26.8 | 4.39 |
| An09g06250 | strong similarity to vacuolar aminopeptidase Ysci - <i>Saccharomyces cerevisiae</i>                                      | 0 | 516  | 1   | 0   | 8   | 8   | 0.8  | 5.8  | 4.36 |
| An10g00170 | strong similarity to protein sequence 79 from patent WO0129221 - <i>Homo sapiens</i>                                     | 0 | 330  | 2   | 0   | 6   | 9   | 2.0  | 8.5  | 4.36 |
| An16g08100 | similarity to hypothetical ureidoglycolate hydrolase SPAC19G12.04 - <i>Schizosaccharomyces pombe</i> -                   | 0 | 254  | 1   | 3   | 0   | 0   | 4.6  | 0.4  | 4.33 |
| An01g00060 | strong similarity to fatty acid synthase $\alpha$ subunit fas2p - <i>Schizosaccharomyces pombe</i>                       | 0 | 1862 | 116 | 166 | 146 | 94  | 39.5 | 23.3 | 4.22 |
| An01g04240 | strong similarity to cytoplasmic acidic ribosomal protein P0 - <i>Saccharomyces cerevisiae</i>                           | 0 | 312  | 16  | 10  | 53  | 12  | 22.1 | 37.9 | 4.19 |
| An05g00160 | strong similarity to cystathionine $\beta$ -synthase Cys4 - <i>Saccharomyces cerevisiae</i> -                            | 0 | 587  | 4   | 4   | 0   | 0   | 3.8  | 0.2  | 4.14 |
| 202202     | strong similarity to actin-bundling protein Sac6, putative [ <i>Neosartorya fischeri</i> NRRL 181]                       | 0 | 644  | 16  | 19  | 10  | 9   | 14.3 | 5.5  | 4.13 |
| An08g06540 | strong similarity to antiproliferative protein prohibitin Phb1 - <i>Saccharomyces cerevisiae</i>                         | 0 | 279  | 2   | 10  | 12  | 24  | 11.7 | 23.6 | 4.12 |
| An07g03440 | similarity to hypothetical protein YHR045w - <i>Saccharomyces cerevisiae</i>                                             | 2 | 564  | 3   | 7   | 32  | 9   | 4.8  | 13.3 | 4.08 |
| An18g01000 | similarity to hypothetical protein EAA30505.1 - <i>Neurospora crassa</i>                                                 | 1 | 284  | 3   | 12  | 19  | 23  | 14.2 | 27.0 | 4.04 |
| An01g04740 | strong similarity to ribosomal protein of the large subunit L12 - <i>Mus musculus</i>                                    | 0 | 165  | 12  | 6   | 10  | 4   | 29.2 | 15.9 | 4.00 |
| An02g12940 | strong similarity to EST an 3344 - <i>Aspergillus niger</i> -                                                            | 0 | 253  | 2   | 5   | 1   | 1   | 7.7  | 1.8  | 3.99 |
| An11g11230 | strong similarity to citrate transport protein Ctp1 - <i>Saccharomyces cerevisiae</i>                                    | 0 | 296  | 0   | 0   | 3   | 4   | 0.4  | 4.6  | 3.97 |
| An02g03950 | strong similarity to cytoplasmic ribosomal protein of the large subunit L3 - <i>Saccharomyces cerevisiae</i>             | 0 | 392  | 27  | 30  | 30  | 19  | 38.2 | 22.8 | 3.93 |
| An06g01390 | strong similarity to 21.3 kD subunit of NADH:ubiquinone reductase - <i>Neurospora crassa</i>                             | 3 | 195  | 1   | 8   | 9   | 17  | 12.7 | 24.5 | 3.83 |
| An01g08800 | strong similarity to glutamine synthase Gln1 - <i>Saccharomyces cerevisiae</i>                                           | 0 | 375  | 25  | 11  | 75  | 10  | 25.3 | 41.1 | 3.79 |
| An07g01640 | strong similarity to calmodulin 6 CaM6 - <i>Arabidopsis thaliana</i> -                                                   | 0 | 143  | 4   | 1   | 1   | 1   | 10.0 | 3.2  | 3.75 |
| An02g01580 | strong similarity to vesicular transport protein SEC17 - <i>Pichia pastoris</i>                                          | 0 | 294  | 1   | 6   | 16  | 9   | 6.6  | 15.6 | 3.75 |
| An04g01870 | strong similarity to proteasome 20S subunit Pre1 - <i>Saccharomyces cerevisiae</i> [putative sequencing error]           | 0 | 203  | 0   | 0   | 3   | 2   | 0.6  | 4.9  | 3.70 |
| An01g03460 | cytoplasmic ribosomal protein of the large subunit L15 rpl15 - <i>Aspergillus niger</i>                                  | 0 | 203  | 5   | 4   | 22  | 4   | 12.2 | 23.5 | 3.68 |
| An11g09500 | strong similarity to cytoplasmic ribosomal protein of the small subunit S4.e - <i>Saccharomyces cerevisiae</i>           | 0 | 258  | 26  | 28  | 30  | 22  | 55.0 | 36.7 | 3.66 |
| An01g09840 | strong similarity to hypothetical protein AN0630.2 - <i>Aspergillus nidulans</i>                                         | 1 | 74   | 0   | 1   | 3   | 2   | 5.3  | 13.4 | 3.66 |
| An18g04310 | strong similarity to cytoplasmic ribosomal protein of the small subunit S12 - <i>Sus scrofa</i>                          | 0 | 150  | 4   | 2   | 15  | 3   | 11.3 | 22.2 | 3.66 |
| An02g11440 | strong similarity to hypothetical protein SPCC1450.12 - <i>Schizosaccharomyces pombe</i> -                               | 0 | 919  | 2   | 15  | 2   | 1   | 5.0  | 0.7  | 3.64 |
| An01g05800 | similarity to lactone-specific esterase estf1 - <i>Pseudomonas fluorescens</i>                                           | 0 | 296  | 1   | 0   | 7   | 3   | 1.3  | 6.4  | 3.64 |
| An03g06550 | glucan 1,4- $\alpha$ -glucosidase glaA - <i>Aspergillus niger</i>                                                        | 0 | 640  | 19  | 44  | 111 | 35  | 25.8 | 41.3 | 3.60 |
| An13g01530 | weak similarity to hypothetical protein ycnE - <i>Bacillus subtilis</i> -                                                | 0 | 102  | 1   | 2   | 1   | 0   | 8.9  | 2.7  | 3.59 |
| An01g13600 | strong similarity to mitochondrial phosphate transport protein Mir1 - <i>Saccharomyces cerevisiae</i>                    | 0 | 314  | 15  | 41  | 57  | 59  | 46.8 | 66.9 | 3.57 |
| An12g01190 | strong similarity to syntaxin-related protein (T-SNARE) Sso2 - <i>Saccharomyces cerevisiae</i>                           | 1 | 308  | 0   | 2   | 4   | 9   | 2.1  | 7.9  | 3.57 |
| An02g07010 | strong similarity to ubiquitin ubi1 - <i>Aspergillus nidulans</i>                                                        | 0 | 154  | 0   | 0   | 4   | 0   | 0.8  | 5.3  | 3.57 |
| An01g12810 | similarity to BAX-associated protein fragment SEQ ID NO:242 from patent WO200264766-A2 - <i>Saccharomyces cerevisiae</i> | 2 | 222  | 16  | 13  | 9   | 16  | 34.6 | 20.7 | 3.51 |
| An04g00990 | NADP-dependent glutamate dehydrogenase gdhA from patent WO9951756-A - <i>Aspergillus niger</i>                           | 0 | 460  | 57  | 51  | 152 | 61  | 61.4 | 83.7 | 3.45 |

|            |                                                                                                                  |    |      |    |     |    |     |      |      |      |
|------------|------------------------------------------------------------------------------------------------------------------|----|------|----|-----|----|-----|------|------|------|
| An02g11910 | similarity to mitochondrial pyruvate dehydrogenase complex protein Pdx1 - <i>Saccharomyces cerevisiae</i>        | 0  | 289  | 4  | 24  | 16 | 6   | 25.7 | 14.0 | 3.45 |
| An12g05360 | strong similarity to cholesterol 24-hydroxylase - <i>Mus musculus</i>                                            | 0  | 569  | 32 | 50  | 22 | 51  | 37.7 | 23.3 | 3.45 |
| An03g02430 | strong similarity to mannitol dehydrogenase mtlD - <i>Pseudomonas fluorescens</i> -                              | 0  | 488  | 3  | 8   | 3  | 0   | 6.1  | 1.3  | 3.43 |
| An07g02800 | strong similarity to hypothetical protein 2E4.30 - <i>Neurospora crassa</i> -                                    | 3  | 346  | 3  | 6   | 1  | 2   | 7.1  | 1.8  | 3.37 |
| An16g08180 | similarity to palmitylated serine/threonine kinase PKL12 - <i>Mus musculus</i> [putative frameshift]             | 0  | 375  | 0  | 1   | 8  | 3   | 1.0  | 5.5  | 3.37 |
| An04g04970 | strong similarity to Yta11 - <i>Saccharomyces cerevisiae</i>                                                     | 1  | 803  | 0  | 4   | 11 | 17  | 1.5  | 6.4  | 3.36 |
| An01g11340 | strong similarity to methionyl aminopeptidase Map1 - <i>Saccharomyces cerevisiae</i> -                           | 0  | 379  | 4  | 4   | 0  | 2   | 5.8  | 1.2  | 3.35 |
| An06g01550 | strong similarity to glucan synthase FKS - <i>Paracoccidioides brasiliensis</i>                                  | 16 | 1897 | 4  | 29  | 86 | 38  | 4.6  | 11.8 | 3.30 |
| An18g06290 | strong similarity to calcium P-type ATPase nca-1 - <i>Neurospora crassa</i>                                      | 9  | 1008 | 48 | 58  | 49 | 38  | 27.5 | 15.7 | 3.29 |
| An16g08740 | strong similarity to 17.8 kD subunit of NADH:ubiquinone reductase Nuo-17.8 - <i>Neurospora crassa</i>            | 0  | 172  | 0  | 1   | 3  | 4   | 2.3  | 7.9  | 3.27 |
| An07g03850 | strong similarity to transaldolase Tal1 - <i>Saccharomyces cerevisiae</i>                                        | 0  | 324  | 23 | 27  | 32 | 14  | 40.6 | 25.9 | 3.27 |
| An03g04790 | strong similarity to mitochondrial outer membrane protein Tom70 - <i>Podospora anserina</i>                      | 1  | 629  | 8  | 13  | 37 | 26  | 8.9  | 18.2 | 3.27 |
| An07g06030 | strong similarity to coatomer $\gamma$ subunit 2 copg2 - <i>Homo sapiens</i>                                     | 0  | 916  | 17 | 15  | 2  | 13  | 9.2  | 3.1  | 3.26 |
| An07g03770 | strong similarity to Cu Zn superoxide dismutase sodC - <i>Aspergillus fumigatus</i>                              | 0  | 154  | 7  | 7   | 7  | 4   | 24.5 | 13.5 | 3.25 |
| An16g07380 | strong similarity to hypothetical cDNA MGC:7080 - <i>Mus musculus</i>                                            | 3  | 283  | 1  | 0   | 4  | 5   | 1.4  | 6.1  | 3.17 |
| An08g10690 | strong similarity to 40 kD subunit of NADH-ubiquinone reductase NUO-40 - <i>Neurospora crassa</i>                | 0  | 372  | 1  | 20  | 24 | 30  | 15.0 | 26.4 | 3.17 |
| An09g05180 | strong similarity to cytoplasmic ribosomal protein of the large subunit L4 - <i>Saccharomyces cerevisiae</i>     | 0  | 372  | 30 | 27  | 29 | 24  | 40.2 | 25.9 | 3.11 |
| An02g12070 | strong similarity to mitochondrial phosphate transport protein G7 - <i>Glycine max</i>                           | 0  | 379  | 0  | 0   | 5  | 2   | 0.3  | 3.6  | 3.10 |
| An02g05860 | strong similarity to rac-family serine/threonine protein kinase homolog dagA - <i>Dictyostelium discoideum</i> - | 0  | 626  | 6  | 6   | 1  | 2   | 5.2  | 1.0  | 3.09 |
| An02g11680 | strong similarity to translation initiation factor eIF-4A - <i>Schizosaccharomyces pombe</i>                     | 0  | 398  | 24 | 15  | 15 | 17  | 25.8 | 14.7 | 3.08 |
| An05g00110 | strong similarity to hypothetical protein YNR020c - <i>Saccharomyces cerevisiae</i>                              | 0  | 237  | 0  | 1   | 2  | 6   | 1.6  | 6.5  | 3.06 |
| An04g03360 | strong similarity to acidic Ca(2+)-independent phospholipase A2 aiPLA2 - <i>Rattus norvegicus</i>                | 0  | 212  | 7  | 3   | 2  | 4   | 12.9 | 5.5  | 3.02 |
| An12g07830 | strong similarity to cytoplasmic ribosomal protein of the large subunit L30 - <i>Kluyveromyces lactis</i>        | 0  | 159  | 6  | 3   | 2  | 4   | 15.6 | 7.4  | 2.98 |
| An18g02900 | strong similarity to hypothetical protein SPAC8A4.09c - <i>Schizosaccharomyces pombe</i> -                       | 0  | 372  | 2  | 2   | 0  | 0   | 3.1  | 0.2  | 2.95 |
| An11g04180 | dnaK-type molecular chaperone bipA - <i>Aspergillus niger</i>                                                    | 1  | 672  | 68 | 117 | 89 | 107 | 71.8 | 52.7 | 2.94 |
| An16g07040 | similarity to $\beta$ -1,3-glucanosyltransferase bgt1 - <i>Aspergillus fumigatus</i> [truncated ORF]             | 0  | 423  | 1  | 3   | 17 | 2   | 2.8  | 8.3  | 2.91 |
| An08g01590 | similarity to membrane associated protein SLP-2 - <i>Homo sapiens</i>                                            | 0  | 436  | 1  | 5   | 9  | 15  | 3.9  | 10.1 | 2.89 |
| An18g02170 | strong similarity to mannosyltransferase Ktr5 - <i>Saccharomyces cerevisiae</i>                                  | 1  | 502  | 6  | 9   | 28 | 17  | 8.0  | 16.4 | 2.89 |
| An04g07440 | similarity to endoplasmic reticulum membrane protein Shr3 - <i>Saccharomyces cerevisiae</i> [truncated ORF]      | 3  | 192  | 6  | 13  | 8  | 8   | 26.4 | 15.5 | 2.88 |
| An03g06880 | strong similarity to carboxypeptidase Y-sorting protein Pep1 - <i>Saccharomyces cerevisiae</i>                   | 2  | 1472 | 2  | 12  | 41 | 23  | 2.6  | 7.9  | 2.86 |
| An12g08720 | similarity to hypothetical protein AAG27909.1 - <i>Arabidopsis thaliana</i>                                      | 0  | 521  | 10 | 25  | 51 | 33  | 17.7 | 29.3 | 2.86 |
| An14g04170 | cytochrome c oxidase subunit V cox5 - <i>Aspergillus niger</i>                                                   | 0  | 198  | 2  | 8   | 11 | 15  | 13.8 | 24.1 | 2.85 |
| An03g04340 | strong similarity to ER membrane translocation facilitator Sec61 - <i>Yarrowia lipolytica</i>                    | 10 | 478  | 14 | 26  | 14 | 18  | 22.1 | 12.3 | 2.83 |
| An07g08850 | strong similarity to cytoplasmic ribosomal protein of the small subunit Rps11b - <i>Saccharomyces cerevisiae</i> | 0  | 160  | 2  | 2   | 11 | 2   | 7.3  | 15.2 | 2.83 |
| An02g07650 | strong similarity to phosphoglucomutase pgmB - <i>Aspergillus nidulans</i> -                                     | 0  | 555  | 6  | 11  | 8  | 0   | 8.2  | 2.8  | 2.82 |
| An02g12770 | strong similarity to succinate dehydrogenase Sdh1 - <i>Saccharomyces cerevisiae</i>                              | 0  | 646  | 8  | 46  | 72 | 51  | 22.0 | 34.5 | 2.80 |
| An02g02530 | strong similarity to ATP-dependent RNA helicase p68 - <i>Homo sapiens</i>                                        | 0  | 565  | 9  | 22  | 7  | 14  | 14.5 | 6.9  | 2.80 |
| An12g04750 | strong similarity to prohibitin Phb2 - <i>Saccharomyces cerevisiae</i>                                           | 1  | 306  | 4  | 8   | 11 | 22  | 10.6 | 19.7 | 2.78 |
| An01g10880 | similarity to F1F0-ATP synthase subunit g homolog Atp20 - <i>Saccharomyces cerevisiae</i>                        | 0  | 198  | 3  | 3   | 6  | 12  | 8.5  | 16.9 | 2.77 |
| An11g04620 | strong similarity to proteasome 20S subunit Pup1 - <i>Saccharomyces cerevisiae</i>                               | 0  | 272  | 0  | 0   | 3  | 2   | 0.5  | 3.6  | 2.76 |

|            |                                                                                                         |   |      |    |     |     |     |      |       |      |
|------------|---------------------------------------------------------------------------------------------------------|---|------|----|-----|-----|-----|------|-------|------|
| An17g01420 | strong similarity to hypothetical transport protein SPCC830.08c - Schizosaccharomyces pombe             | 3 | 169  | 21 | 15  | 11  | 26  | 56.2 | 40.0  | 2.73 |
| An08g03450 | strong similarity to 3-ketosphinganine reductase Tsc10 - Saccharomyces cerevisiae-                      | 0 | 322  | 4  | 5   | 3   | 1   | 7.7  | 2.5   | 2.73 |
| An18g04220 | strong similarity to mitochondrial ADP/ATP carrier anc1p - Schizosaccharomyces pombe                    | 4 | 319  | 29 | 85  | 96  | 111 | 93.4 | 117.3 | 2.72 |
| An07g01470 | strong similarity to hypothetical v-snare binding protein SPAC56F8.08 - Schizosaccharomyces pombe-      | 0 | 324  | 1  | 4   | 1   | 0   | 4.4  | 0.8   | 2.68 |
| An01g02320 | strong similarity to GTP-binding protein a-ras - Aspergillus nidulans                                   | 0 | 212  | 2  | 2   | 2   | 12  | 5.5  | 12.3  | 2.67 |
| An02g01750 | strong similarity to chaperone involved in mitochondrial protein import Mge1 - Saccharomyces cerevisiae | 0 | 240  | 0  | 2   | 7   | 3   | 2.7  | 7.9   | 2.64 |
| An16g07290 | strong similarity to F1Fo-ATP synthase subunit 4 ATP4 - Kluyveromyces lactis                            | 0 | 244  | 3  | 14  | 14  | 26  | 18.7 | 29.9  | 2.64 |
| An04g08060 | hypothetical protein                                                                                    | 0 | 210  | 0  | 0   | 3   | 1   | 0.6  | 3.9   | 2.62 |
| An04g09250 | strong similarity to protein involved in vacuolar protein sorting Mvp1 - Saccharomyces cerevisiae       | 0 | 558  | 2  | 3   | 14  | 9   | 2.6  | 7.6   | 2.60 |
| An02g06130 | strong similarity to cytoplasmic ribosomal protein of the small subunit S14.e - Neurospora crassa       | 0 | 150  | 12 | 9   | 10  | 10  | 37.3 | 24.7  | 2.60 |
| An01g04040 | secretion-associated GTP-binding protein sarA - Aspergillus niger                                       | 0 | 189  | 9  | 19  | 5   | 22  | 39.2 | 26.2  | 2.60 |
| An02g05890 | strong similarity to protein disulfide-isomerase pdi1 - Caenorhabditis elegans                          | 1 | 731  | 11 | 38  | 73  | 42  | 17.6 | 28.5  | 2.59 |
| An18g05000 | strong similarity to host infection protein cap20 - Colletotrichum gloeosporioides-                     | 0 | 188  | 2  | 5   | 0   | 4   | 10.4 | 4.3   | 2.58 |
| An01g13390 | similarity to hypothetical protein CAD21062.1 - Neurospora crassa                                       | 0 | 374  | 0  | 0   | 4   | 2   | 0.3  | 3.1   | 2.57 |
| An15g00760 | strong similarity to translation elongation factor eEF-1 $\gamma$ chain - Artemia sp.                   | 0 | 412  | 27 | 29  | 31  | 22  | 35.7 | 23.4  | 2.56 |
| An01g13930 | similarity to succinate dehydrogenase - Saccharomyces cerevisiae                                        | 0 | 220  | 0  | 1   | 5   | 2   | 1.8  | 6.1   | 2.56 |
| An11g01180 | weak similarity to immunoglobulin kappa light chain - Mus musculus                                      | 1 | 282  | 1  | 2   | 7   | 6   | 3.2  | 8.6   | 2.56 |
| An11g00530 | strong similarity to ATP citrate lyase - Homo sapiens                                                   | 0 | 485  | 45 | 44  | 52  | 38  | 48.0 | 33.7  | 2.54 |
| An01g00050 | similarity to fatty-acyl-CoA synthase $\beta$ chain Fas1 - Saccharomyces cerevisiae [truncated ORF]     | 0 | 1464 | 86 | 115 | 129 | 62  | 35.8 | 23.6  | 2.53 |
| An18g00260 | strong similarity to cytochrome P450 monooxygenase avnA - Aspergillus parasiticus                       | 1 | 513  | 5  | 14  | 7   | 4   | 9.9  | 4.0   | 2.53 |
| An18g05670 | strong similarity to 23 kD subunit of NADH:ubiquinone reductase - Bos taurus                            | 0 | 224  | 1  | 3   | 7   | 7   | 5.2  | 11.7  | 2.52 |
| An04g01540 | strong similarity to diphosphomevalonate decarboxylase Erg19 - Saccharomyces cerevisiae-                | 0 | 404  | 2  | 5   | 2   | 0   | 4.8  | 1.1   | 2.50 |
| An03g03360 | strong similarity to carnitine/acyl carnitine carrier acuH - Aspergillus nidulans                       | 1 | 325  | 1  | 3   | 8   | 8   | 3.6  | 9.2   | 2.50 |
| An18g04180 | strong similarity to cytoplasmic ribosomal protein of the small subunit S19 - Saccharomyces cerevisiae- | 0 | 147  | 2  | 1   | 1   | 0   | 6.2  | 1.8   | 2.49 |
| An04g05430 | strong similarity to hypothetical protein CAD21051.1 - Neurospora crassa                                | 1 | 588  | 2  | 6   | 18  | 12  | 3.8  | 9.4   | 2.46 |
| An14g00300 | strong similarity to 1-acyldihydroxyacetone-phosphate reductase Ayr1 - Saccharomyces cerevisiae         | 0 | 295  | 0  | 1   | 5   | 3   | 1.3  | 5.2   | 2.46 |
| An08g01370 | strong similarity to Oxodicarboxylate carrier Odc2 - Saccharomyces cerevisiae                           | 0 | 305  | 1  | 7   | 13  | 11  | 7.3  | 14.5  | 2.46 |
| An14g00060 | strong similarity to 20.9 kD subunit of NADH:ubiquinone reductase - Neurospora crassa                   | 2 | 188  | 0  | 7   | 7   | 12  | 10.4 | 18.7  | 2.42 |
| An11g09390 | strong similarity to 21 kD subunit of NADH:ubiquinone reductase nuo-21 - Neurospora crassa              | 0 | 219  | 0  | 14  | 14  | 19  | 17.2 | 27.6  | 2.42 |
| An08g03970 | strong similarity to hypothetical protein CAE47902.1 - Aspergillus fumigatus                            | 1 | 396  | 8  | 9   | 6   | 5   | 11.5 | 5.2   | 2.40 |
| An08g03430 | strong similarity to cytoplasmic ribosomal protein of the large subunit L6 - Saccharomyces cerevisiae   | 0 | 202  | 21 | 21  | 26  | 18  | 54.8 | 39.7  | 2.40 |
| An16g08020 | strong similarity to valine--tRNA ligase cyt-20 - Neurospora crassa [putative frameshift]               | 0 | 1054 | 3  | 1   | 25  | 2   | 1.1  | 4.7   | 2.39 |
| An04g00110 | strong similarity to 21/29 kD subunit of NADH:ubiquinone reductase - Neurospora crassa                  | 0 | 280  | 0  | 5   | 8   | 9   | 5.1  | 11.3  | 2.38 |
| An11g01760 | strong similarity to proteasome 20S subunit Pre2 - Saccharomyces cerevisiae                             | 0 | 379  | 1  | 0   | 5   | 4   | 1.0  | 4.5   | 2.37 |
| An07g07840 | strong similarity to cytoplasmic ribosomal protein of the large subunit L23 - Saccharomyces cerevisiae- | 0 | 140  | 2  | 2   | 2   | 0   | 8.4  | 3.2   | 2.37 |
| An14g02090 | similarity to hypothetical protein BAE64442.1 - Aspergillus oryzae                                      | 2 | 174  | 0  | 1   | 4   | 2   | 2.2  | 6.7   | 2.35 |
| An02g08820 | strong similarity to hypothetical protein SPBC31F10.16 - Schizosaccharomyces pombe                      | 0 | 708  | 6  | 9   | 4   | 2   | 5.7  | 1.7   | 2.35 |
| An13g01210 | strong similarity to proteasome 20S subunit Pre3 - Saccharomyces cerevisiae                             | 0 | 199  | 3  | 0   | 7   | 4   | 4.6  | 10.4  | 2.34 |
| An12g10380 | strong similarity to chitin synthase C chsC - Aspergillus fumigatus                                     | 8 | 884  | 0  | 1   | 8   | 7   | 0.4  | 3.2   | 2.32 |

|            |                                                                                                                    |    |      |    |     |    |    |      |      |      |
|------------|--------------------------------------------------------------------------------------------------------------------|----|------|----|-----|----|----|------|------|------|
| An09g05490 | strong similarity to COP-coated vesicle membrane protein P24 homolog lbrA - Polysphondylium pallidum               | 2  | 239  | 1  | 4   | 9  | 7  | 6.0  | 12.5 | 2.31 |
| An05g02320 | similarity to $\alpha$ -1,6-mannosyltransferase from patent JP09003097-A - Pichia pastoris                         | 0  | 406  | 2  | 0   | 9  | 3  | 1.6  | 5.6  | 2.31 |
| An12g08570 | similarity to type 2 peroxiredoxin PrxII - Brassica napus                                                          | 0  | 168  | 6  | 8   | 8  | 4  | 22.5 | 13.4 | 2.30 |
| An03g03570 | strong similarity to hypothetical protein Afu2g14370 - Aspergillus fumigatus                                       | 5  | 513  | 0  | 0   | 6  | 1  | 0.3  | 2.6  | 2.29 |
| An10g00360 | strong similarity to nuclear pore-associated DEAD-box protein Dbp5 - Saccharomyces cerevisiae                      | 0  | 482  | 6  | 4   | 2  | 2  | 5.7  | 1.7  | 2.28 |
| An02g04020 | strong similarity to adenylosuccinate lyase ADSL - Homo sapiens-                                                   | 0  | 483  | 2  | 2   | 0  | 0  | 2.4  | 0.2  | 2.28 |
| An02g14930 | strong similarity to dolichyl-diphosphooligosaccharide-protein glycotransferase $\gamma$ chain Ost3 - S.cerevisiae | 3  | 335  | 1  | 9   | 18 | 10 | 8.2  | 15.3 | 2.23 |
| An04g01200 | strong similarity to 14 kD subunit of ubiquinol--cytochrome c reductase Qcr7 - Saccharomyces cerevisiae            | 0  | 122  | 0  | 1   | 3  | 2  | 3.2  | 8.1  | 2.22 |
| An09g00650 | similarity to hypothetical protein F9K20.18 - Arabidopsis thaliana-                                                | 0  | 242  | 3  | 2   | 2  | 0  | 5.9  | 1.9  | 2.22 |
| An07g07150 | strong similarity to single-stranded nucleic acid binding protein CBP - Mus musculus                               | 0  | 360  | 10 | 3   | 5  | 3  | 9.8  | 4.3  | 2.22 |
| An03g03050 | strong similarity to cDNA gene trap ankyrin repeat containing protein Gtar - Mus musculus-                         | 0  | 826  | 1  | 9   | 1  | 1  | 3.3  | 0.5  | 2.20 |
| An12g05170 | similarity to hypothetical protein AAM35689.1 - Xanthomonas axonopodis                                             | 0  | 295  | 5  | 3   | 18 | 5  | 7.5  | 14.4 | 2.20 |
| An07g03760 | strong similarity to 100 kDa coactivator snd1 - Homo sapiens                                                       | 0  | 883  | 5  | 4   | 29 | 7  | 2.8  | 7.5  | 2.19 |
| An18g01170 | strong similarity to poly(ADP-ribose) polymerase NAP protein from patent WO200004173-A1 - Zea mays-                | 0  | 650  | 1  | 4   | 0  | 0  | 2.2  | 0.1  | 2.19 |
| An11g01960 | similarity to transsulphurylation protein hxB - Aspergillus nidulans [putative sequencing error]                   | 0  | 345  | 0  | 0   | 2  | 3  | 0.4  | 2.9  | 2.18 |
| An04g04750 | strong similarity to oxoglutarate dehydrogenase (lipoamide) Kgd1 - Saccharomyces cerevisiae                        | 0  | 1055 | 16 | 8   | 50 | 21 | 6.0  | 12.2 | 2.13 |
| An16g02990 | strong similarity to phosphoglycerate mutase pgm - Bacillus subtilis                                               | 0  | 520  | 11 | 11  | 8  | 7  | 11.3 | 5.4  | 2.13 |
| An16g07150 | strong similarity to soluble cytoplasmic fumarate reductase YEL047c - Saccharomyces cerevisiae                     | 0  | 629  | 5  | 12  | 2  | 7  | 7.2  | 2.7  | 2.12 |
| An12g00030 | strong similarity to L-iditol 2-dehydrogenase Sor1 - Saccharomyces cerevisiae                                      | 0  | 358  | 0  | 0   | 3  | 2  | 0.4  | 2.8  | 2.10 |
| An01g08010 | strong similarity to iron and manganese transporter Ccc1 - Saccharomyces cerevisiae                                | 3  | 303  | 0  | 2   | 3  | 7  | 2.1  | 6.3  | 2.09 |
| An02g06710 | strong similarity to suppressor of tom1 protein Mpt4 - Saccharomyces cerevisiae                                    | 0  | 303  | 2  | 0   | 7  | 3  | 2.1  | 6.3  | 2.09 |
| An11g06200 | strong similarity to 31 kD subunit of NADH:ubiquinone reductase - Neurospora crassa                                | 0  | 280  | 1  | 11  | 16 | 14 | 11.6 | 19.6 | 2.09 |
| An16g01830 | glyceraldehyde-3-phosphate dehydrogenase gpdA - Aspergillus niger                                                  | 0  | 336  | 18 | 12  | 14 | 13 | 23.6 | 14.8 | 2.06 |
| An01g06960 | strong similarity to hypothetical phosphatidyl synthase SPAC22A12.08c - Schizosaccharomyces pombe                  | 0  | 364  | 0  | 0   | 3  | 2  | 0.4  | 2.7  | 2.06 |
| An08g06130 | strong similarity to GTP-binding regulatory protein $\alpha$ chain fadA - Aspergillus nidulans                     | 0  | 353  | 0  | 1   | 4  | 4  | 1.1  | 4.3  | 2.06 |
| An01g09310 | similarity to $\beta$ -ketoacyl reductase rhlG - Pseudomonas aeruginosa-                                           | 0  | 262  | 3  | 2   | 0  | 2  | 5.5  | 1.7  | 2.05 |
| An18g01590 | strong similarity to carnitine O-acetyltransferase cat2 - Candida tropicalis                                       | 0  | 643  | 8  | 10  | 7  | 3  | 7.5  | 2.9  | 2.05 |
| 56930      | strong similarity to small oligopeptide transporter, OPT family [Aspergillus clavatus NRRL 1]                      | 15 | 786  | 2  | 3   | 14 | 10 | 1.8  | 5.6  | 2.04 |
| An02g14800 | protein disulfide isomerase A pdiA - Aspergillus niger                                                             | 0  | 515  | 44 | 105 | 82 | 86 | 75.6 | 59.0 | 2.04 |
| An02g05880 | strong similarity to 29.9 kD subunit of NADH:ubiquinone reductase - Neurospora crassa                              | 0  | 237  | 0  | 10  | 5  | 20 | 11.5 | 19.4 | 2.03 |
| An11g10790 | similarity to serum paraoxonase/arylesterase 2 PON2 - Gallus gallus                                                | 1  | 422  | 3  | 7   | 1  | 4  | 6.5  | 2.4  | 2.00 |
| An09g06480 | similarity to hypothetical protein YJL145w - Saccharomyces cerevisiae                                              | 0  | 477  | 10 | 11  | 12 | 3  | 11.7 | 5.9  | 2.00 |
| An16g07410 | strong similarity to mitochondrial F1-ATPase $\alpha$ -subunit Atp1 - Saccharomyces cerevisiae                     | 0  | 556  | 31 | 37  | 71 | 65 | 32.1 | 44.3 | 1.97 |
| An14g02250 | strong similarity to flavocytochrome b2 L-lactate dehydrogenase CYB2 - Pichia anomala                              | 0  | 500  | 9  | 5   | 4  | 4  | 7.5  | 3.1  | 1.95 |
| An09g05630 | strong similarity to hypothetical protein encoded by gene B18D24.80 - Neurospora crassa                            | 1  | 130  | 0  | 2   | 3  | 4  | 5.0  | 10.4 | 1.93 |
| An08g00610 | strong similarity to cytoplasmic ribosomal protein of the large subunit L9.b - Saccharomyces cerevisiae            | 0  | 192  | 13 | 12  | 11 | 14 | 34.6 | 24.0 | 1.93 |
| An16g05020 | strong similarity to protein vip1p - Schizosaccharomyces pombe                                                     | 0  | 257  | 2  | 0   | 5  | 4  | 2.5  | 6.7  | 1.93 |
| An15g01240 | strong similarity to protein required for accurate mitotic chromosome segregation Cse1 - S.cerevisiae              | 0  | 962  | 3  | 1   | 19 | 4  | 1.2  | 4.4  | 1.92 |
| An12g10210 | similarity to hypothetical protein CAD21295.1 - Neurospora crassa                                                  | 1  | 289  | 0  | 0   | 3  | 1  | 0.5  | 2.8  | 1.90 |
| An08g05300 | strong similarity to heat shock protein Hsp70 ss1p - Schizosaccharomyces pombe-                                    | 0  | 712  | 2  | 15  | 48 | 0  | 6.4  | 12.3 | 1.89 |

|            |                                                                                                                                |   |      |    |    |    |    |      |      |      |
|------------|--------------------------------------------------------------------------------------------------------------------------------|---|------|----|----|----|----|------|------|------|
| An10g00400 | strong similarity to 1,3- $\beta$ -glucanosyltransferase gel1 - <i>Aspergillus fumigatus</i>                                   | 1 | 458  | 0  | 3  | 11 | 3  | 2.0  | 5.7  | 1.88 |
| An04g02640 | strong similarity to protein pescadillo - <i>Homo sapiens</i>                                                                  | 0 | 673  | 1  | 0  | 6  | 5  | 0.6  | 3.1  | 1.88 |
| An17g01977 | strong similarity to glycine-tRNA ligase Grs1 - <i>Saccharomyces cerevisiae</i>                                                | 0 | 626  | 0  | 0  | 6  | 1  | 0.2  | 2.2  | 1.88 |
| An04g02480 | strong similarity to lipid phosphoinositide phosphatase Sac1 - <i>Saccharomyces cerevisiae</i>                                 | 2 | 687  | 32 | 56 | 36 | 52 | 33.5 | 23.2 | 1.88 |
| An08g05400 | strong similarity to peroxisomal acetyl-CoA C-acyltransferase POT1 - <i>Yarrowia lipolytica</i> -                              | 0 | 418  | 1  | 2  | 0  | 0  | 2.2  | 0.2  | 1.87 |
| An07g01520 | strong similarity to nucleoporin Nup170 - <i>Saccharomyces cerevisiae</i>                                                      | 0 | 1350 | 18 | 7  | 1  | 10 | 4.9  | 1.5  | 1.86 |
| An02g02230 | strong similarity to hypothetical protein SPAC824.01 - <i>Schizosaccharomyces pombe</i>                                        | 0 | 741  | 1  | 3  | 10 | 10 | 1.6  | 5.0  | 1.86 |
| An01g04730 | strong similarity to secretory protein Sec23 - <i>Saccharomyces cerevisiae</i>                                                 | 0 | 768  | 19 | 7  | 8  | 9  | 9.0  | 4.1  | 1.86 |
| An18g05640 | strong similarity to hypothetical mold-specific protein MS8 - <i>Ajellomyces capsulatus</i>                                    | 0 | 198  | 1  | 6  | 7  | 11 | 9.9  | 16.9 | 1.85 |
| An08g07470 | similarity to VAMP-7 vesicle-associated membrane protein-7 - <i>Rattus norvegicus</i>                                          | 1 | 269  | 0  | 2  | 4  | 5  | 2.4  | 6.4  | 1.84 |
| An11g00470 | strong similarity to ribose 5-phosphate isomerase RPI - <i>Mus musculus</i> -                                                  | 0 | 273  | 3  | 3  | 3  | 0  | 6.2  | 2.3  | 1.84 |
| An01g03050 | similarity to polyadenylate-binding protein Pabp - <i>Saccharomyces cerevisiae</i>                                             | 0 | 731  | 25 | 24 | 24 | 18 | 17.6 | 10.5 | 1.83 |
| An12g05750 | strong similarity to high-affinity inorganic phosphate/H <sup>+</sup> symporter Pho84 - <i>Saccharomyces cerevisiae</i>        | 9 | 645  | 0  | 0  | 4  | 3  | 0.2  | 2.1  | 1.82 |
| An01g11010 | strong similarity to cell wall protein Crh1 - <i>Saccharomyces cerevisiae</i>                                                  | 0 | 396  | 0  | 3  | 9  | 4  | 2.3  | 6.1  | 1.82 |
| An04g04060 | strong similarity to cytochrome-c peroxidase precursor Ccp1 - <i>Saccharomyces cerevisiae</i>                                  | 0 | 364  | 22 | 41 | 37 | 30 | 45.4 | 33.5 | 1.82 |
| An16g04430 | strong similarity to membrane steroid hormone-binding protein MSBP - <i>Bos taurus</i>                                         | 1 | 169  | 4  | 11 | 7  | 7  | 23.9 | 15.5 | 1.80 |
| An01g07320 | strong similarity to embryogenesis protein H $\beta$ 58 - <i>Mus musculus</i>                                                  | 0 | 352  | 6  | 6  | 4  | 4  | 9.2  | 4.4  | 1.80 |
| An16g06850 | strong similarity to translation initiation factor eIF-4F Tif4631 - <i>Saccharomyces cerevisiae</i>                            | 0 | 1315 | 7  | 8  | 2  | 2  | 3.1  | 0.6  | 1.78 |
| An18g03780 | strong similarity to hypothetical protein 9G6.250 - <i>Neurospora crassa</i>                                                   | 9 | 986  | 2  | 3  | 18 | 7  | 1.5  | 4.7  | 1.78 |
| An01g09270 | strong similarity to isocitrate lyase acuD - <i>Aspergillus nidulans</i>                                                       | 0 | 538  | 2  | 12 | 34 | 4  | 7.0  | 12.9 | 1.77 |
| An04g00060 | strong similarity to 19.3 kD subunit of NADH:ubiquinone reductase - <i>Neurospora crassa</i>                                   | 0 | 232  | 0  | 1  | 3  | 3  | 1.7  | 5.1  | 1.77 |
| An04g05420 | strong similarity to $\alpha$ -aminoadipate reductase large subunit lys2 - <i>Penicillium chrysogenum</i> -                    | 0 | 1430 | 8  | 3  | 45 | 0  | 2.1  | 5.7  | 1.77 |
| An02g03270 | strong similarity to methylenetetrahydrofolate reductase Met13 - <i>Saccharomyces cerevisiae</i> -                             | 0 | 626  | 3  | 1  | 0  | 0  | 1.9  | 0.1  | 1.76 |
| An01g12230 | strong similarity to nucleolar protein Nop1 - <i>Saccharomyces cerevisiae</i>                                                  | 0 | 313  | 5  | 1  | 13 | 5  | 5.4  | 10.7 | 1.75 |
| An06g01440 | similarity to heterogeneous nuclear ribonucleoprotein (hnRNP) Tom34 - <i>Saccharomyces cerevisiae</i>                          | 0 | 336  | 17 | 12 | 10 | 17 | 22.9 | 14.8 | 1.75 |
| An08g01610 | strong similarity to hypothetical GTP-binding protein SPAC27E2.03c - <i>Schizosaccharomyces pombe</i>                          | 0 | 394  | 13 | 8  | 7  | 10 | 14.2 | 8.0  | 1.75 |
| An01g13190 | strong similarity to cytoplasmic ribosomal protein of the small subunit S5.e - <i>Saccharomyces cerevisiae</i>                 | 0 | 215  | 18 | 16 | 14 | 22 | 41.8 | 30.6 | 1.72 |
| An18g06350 | strong similarity to hypothetical protein Afu6g06700 - <i>Aspergillus fumigatus</i>                                            | 0 | 209  | 0  | 0  | 1  | 2  | 0.6  | 3.0  | 1.72 |
| An14g00100 | strong similarity to nucleoporin-interacting protein Nic96 - <i>Saccharomyces cerevisiae</i>                                   | 0 | 993  | 10 | 10 | 6  | 4  | 5.4  | 1.9  | 1.72 |
| An09g06490 | strong similarity to oxide squalene cyclising enzyme from patent JP08308568-A - <i>Rattus rattus</i>                           | 0 | 735  | 1  | 5  | 19 | 5  | 2.3  | 6.0  | 1.72 |
| An17g01150 | strong similarity to acyl-CoA dehydrogenase MCAD - <i>Rattus norvegicus</i> -                                                  | 0 | 446  | 3  | 3  | 0  | 2  | 3.8  | 1.0  | 1.72 |
| An06g01870 | strong similarity to cytoplasmic ribosomal protein of the small subunit S10 - <i>Saccharomyces cerevisiae</i>                  | 0 | 154  | 6  | 6  | 7  | 4  | 21.1 | 13.5 | 1.71 |
| An08g02260 | strong similarity to phosphoglycerate kinase pgkA - <i>Aspergillus nidulans</i>                                                | 0 | 417  | 13 | 10 | 10 | 9  | 14.7 | 8.4  | 1.70 |
| An05g01890 | strong similarity to hypothetical protein related to host-specific AK-toxin Akt2 B23L21.350 - <i>Neurospora crassa</i>         | 0 | 461  | 2  | 1  | 0  | 0  | 2.0  | 0.2  | 1.70 |
| An01g11100 | strong similarity to hypothetical membrane protein YBR287w - <i>Saccharomyces cerevisiae</i>                                   | 6 | 443  | 0  | 0  | 1  | 4  | 0.3  | 2.2  | 1.69 |
| An12g04110 | strong similarity to precursor of mitochondrial nuclease Nuc1 - <i>Saccharomyces cerevisiae</i>                                | 1 | 334  | 1  | 3  | 3  | 11 | 3.5  | 7.8  | 1.69 |
| An01g06230 | strong similarity to translation initiation factor 3 subunit eIF3 $\beta$ - <i>Homo sapiens</i>                                | 0 | 740  | 9  | 8  | 43 | 4  | 6.2  | 11.6 | 1.69 |
| An08g03000 | strong similarity to H <sup>+</sup> -transporting ATPase chain C Vma5 - <i>Saccharomyces cerevisiae</i>                        | 0 | 388  | 6  | 3  | 1  | 4  | 6.4  | 2.6  | 1.68 |
| An04g05310 | strong similarity to vacuolar H(+)-transporting ATPase subunit Vph1 - <i>Saccharomyces cerevisiae</i>                          | 6 | 850  | 13 | 33 | 54 | 49 | 14.2 | 22.0 | 1.66 |
| An02g04520 | strong similarity to H <sup>+</sup> -transporting ATP synthase $\delta$ chain precursor Atp5 - <i>Saccharomyces cerevisiae</i> | 0 | 228  | 4  | 4  | 13 | 7  | 9.7  | 16.2 | 1.66 |

|            |                                                                                                        |    |      |    |    |    |    |      |      |      |
|------------|--------------------------------------------------------------------------------------------------------|----|------|----|----|----|----|------|------|------|
| An07g02690 | similarity to hypothetical regulational protein PBK1 - Homo sapiens-                                   | 0  | 407  | 6  | 2  | 4  | 0  | 5.4  | 2.0  | 1.66 |
| An01g08570 | strong similarity to thioredoxin reductase TrxB - Penicillium chrysogenum-                             | 0  | 367  | 2  | 2  | 1  | 0  | 3.2  | 0.7  | 1.65 |
| An18g06470 | strong similarity to DnaJ-like protein MTJ1 - Mus musculus-                                            | 2  | 397  | 4  | 5  | 0  | 5  | 6.2  | 2.5  | 1.65 |
| An16g06820 | strong similarity to hypothetical pathogenicity protein PATH531 - Magnaporthe grisea                   | 2  | 323  | 10 | 7  | 3  | 11 | 14.1 | 8.1  | 1.64 |
| An15g04100 | strong similarity to salicylaldehyde dehydrogenase doxF - Pseudomonas sp.-                             | 0  | 478  | 1  | 2  | 0  | 0  | 1.9  | 0.2  | 1.64 |
| An08g01030 | strong similarity to vacuolar protein sorting protein Vps29 - Saccharomyces cerevisiae                 | 0  | 195  | 5  | 2  | 3  | 2  | 10.0 | 5.1  | 1.63 |
| An02g12410 | strong similarity to translation initiation factor eIF3 subunit Tif34 - Saccharomyces cerevisiae       | 0  | 337  | 0  | 0  | 3  | 1  | 0.4  | 2.4  | 1.63 |
| An02g02910 | strong similarity to orotate reductase pyrE - Aspergillus nidulans                                     | 0  | 544  | 2  | 4  | 8  | 13 | 3.1  | 7.1  | 1.62 |
| An14g00150 | similarity to hypothetical protein B24H17.110 - Neurospora crassa-                                     | 0  | 207  | 1  | 3  | 1  | 1  | 5.7  | 2.2  | 1.60 |
| An07g05520 | strong similarity to O-methyltransferase B omtB - Aspergillus parasiticus-                             | 0  | 380  | 9  | 14 | 20 | 0  | 16.1 | 9.7  | 1.58 |
| An11g02400 | strong similarity to cytosolic lysine--tRNA ligase Krs1 - Saccharomyces cerevisiae                     | 0  | 618  | 0  | 0  | 5  | 1  | 0.2  | 1.9  | 1.55 |
| An14g02460 | strong similarity to flavohemoglobin Fhp - Alcaligenes eutrophus                                       | 0  | 417  | 8  | 8  | 7  | 5  | 10.3 | 5.4  | 1.55 |
| An02g13300 | similarity to hypothetical protein ID880 - Bradyrhizobium japonicum                                    | 0  | 907  | 0  | 0  | 2  | 6  | 0.1  | 1.7  | 1.54 |
| An01g08400 | strong similarity to sorting nexin-1-like protein Vps5 - Saccharomyces cerevisiae-                     | 0  | 567  | 3  | 2  | 0  | 1  | 2.5  | 0.5  | 1.53 |
| An04g02120 | strong similarity to cytoplasmic ribosomal protein of the large subunit L16 - Saccharomyces cerevisiae | 0  | 176  | 11 | 7  | 10 | 8  | 27.4 | 19.0 | 1.53 |
| An01g10730 | similarity to plasma membrane bound receptor from patent DE19627237-A1 - Sus scrofa                    | 0  | 213  | 1  | 7  | 3  | 3  | 10.4 | 5.5  | 1.52 |
| An18g06820 | strong similarity to glutamine-fructose-6-phosphate transaminase Gfa1 - Saccharomyces cerevisiae       | 0  | 694  | 16 | 18 | 16 | 12 | 12.9 | 7.4  | 1.52 |
| An01g10190 | similarity to mitochondrial tricarboxylate carrier - Rattus sp.                                        | 1  | 370  | 0  | 1  | 2  | 5  | 1.1  | 3.7  | 1.52 |
| An15g05770 | strong similarity to hypothetical sulphite reductase SPAC4C5.05c - Schizosaccharomyces pombe           | 0  | 1472 | 48 | 39 | 68 | 8  | 15.5 | 9.4  | 1.51 |
| 211877     | strong similarity to cytochrome P450 oxidoreductase [Aspergillus fumigatus Af293]                      | 2  | 541  | 42 | 56 | 61 | 47 | 47.4 | 36.2 | 1.51 |
| An15g01420 | strong similarity to glucosidase I Cwh41 - Saccharomyces cerevisiae                                    | 0  | 822  | 9  | 34 | 71 | 24 | 13.8 | 21.0 | 1.50 |
| An10g00800 | strong similarity to purine nucleoside permease NUP - Candida albicans-                                | 0  | 407  | 1  | 3  | 1  | 0  | 2.9  | 0.7  | 1.49 |
| An07g06730 | strong similarity to cut3p - Schizosaccharomyces pombe-                                                | 0  | 1309 | 2  | 10 | 0  | 3  | 2.5  | 0.5  | 1.48 |
| An11g02230 | strong similarity to lanosterol 14 $\alpha$ -demethylase (P450(14DM)) CYP51 - Penicillium italicum     | 2  | 512  | 2  | 5  | 16 | 6  | 3.8  | 7.9  | 1.47 |
| An04g05620 | strong similarity to acetate--CoA ligase facA - Aspergillus nidulans                                   | 0  | 670  | 21 | 16 | 19 | 13 | 14.6 | 8.8  | 1.47 |
| 53033      | strong similarity to 1,3- $\beta$ -glucanosyltransferase, putative [Neosartorya fischeri NRRL 181]     | 0  | 537  | 0  | 5  | 16 | 2  | 2.7  | 6.2  | 1.46 |
| An05g00930 | strong similarity to NADP-dependent malate dehydrogenase mdh - Homo sapiens-                           | 0  | 596  | 3  | 2  | 1  | 0  | 2.4  | 0.5  | 1.46 |
| An15g00190 | strong similarity to mitochondrial import receptor MOM38 - Neurospora crassa                           | 0  | 354  | 5  | 17 | 21 | 26 | 16.5 | 24.2 | 1.45 |
| An05g01760 | similarity to hard surface induced protein 3 chip3 - Glomerella cingulata                              | 7  | 501  | 0  | 1  | 7  | 1  | 0.8  | 3.1  | 1.45 |
| An01g12150 | $\beta$ -galactosidase lacA - Aspergillus niger                                                        | 0  | 1007 | 0  | 1  | 9  | 3  | 0.4  | 2.2  | 1.44 |
| An06g01510 | strong similarity to class I $\alpha$ -mannosidase AAB62720.1 - Spodoptera frugiperda                  | 1  | 869  | 4  | 14 | 40 | 9  | 5.5  | 10.3 | 1.44 |
| An01g03110 | similarity to ribosomal protein of the small subunit Rsm7 - Saccharomyces cerevisiae-                  | 0  | 422  | 3  | 1  | 0  | 1  | 2.8  | 0.6  | 1.44 |
| An15g00560 | strong similarity to actin $\gamma$ - Aspergillus nidulans                                             | 0  | 375  | 36 | 41 | 45 | 42 | 53.8 | 42.1 | 1.43 |
| An18g02490 | strong similarity to ARF guanine-nucleotide exchange factor 2 Gea2 - Saccharomyces cerevisiae-         | 0  | 1554 | 6  | 7  | 0  | 3  | 2.3  | 0.4  | 1.42 |
| An18g06680 | strong similarity to proteasome 20S subunit Pre4 - Saccharomyces cerevisiae                            | 0  | 260  | 1  | 1  | 4  | 4  | 2.5  | 5.9  | 1.41 |
| An02g06400 | strong similarity to small Ras-like GTPase Vps21 - Saccharomyces cerevisiae                            | 0  | 262  | 0  | 2  | 4  | 4  | 2.5  | 5.9  | 1.40 |
| An06g01200 | strong similarity to endosomal protein Emp70 - Saccharomyces cerevisiae                                | 9  | 645  | 0  | 1  | 7  | 2  | 0.6  | 2.7  | 1.39 |
| An15g01920 | strong similarity to methylcitrate synthase mcsA - Aspergillus nidulans                                | 0  | 465  | 1  | 9  | 5  | 1  | 5.9  | 2.5  | 1.38 |
| An09g02930 | strong similarity to high-affinity glucose transporter HGT1 - Kluyveromyces lactis                     | 12 | 527  | 0  | 1  | 3  | 5  | 0.7  | 2.9  | 1.38 |
| An08g06810 | strong similarity to pentafunctional enzyme aroM - Aspergillus nidulans                                | 0  | 1587 | 2  | 0  | 16 | 3  | 0.4  | 2.2  | 1.37 |



|            |                                                                                                                                       |   |      |    |    |    |    |      |      |      |
|------------|---------------------------------------------------------------------------------------------------------------------------------------|---|------|----|----|----|----|------|------|------|
| An12g04780 | strong similarity to 24 kD subunit of NADH:ubiquinone reductase Nuo24 - <i>Neurospora crassa</i>                                      | 0 | 269  | 2  | 5  | 7  | 11 | 7.3  | 12.4 | 1.36 |
| An02g02360 | strong similarity to chitin synthase with a myosin motor-like domain csmA - <i>Aspergillus nidulans</i>                               | 2 | 1855 | 0  | 0  | 10 | 3  | 0.1  | 1.3  | 1.36 |
| An16g04020 | strong similarity to peroxisomal membrane protein Pex14 - <i>Hansenula polymorpha</i>                                                 | 0 | 370  | 1  | 5  | 2  | 1  | 4.6  | 1.7  | 1.36 |
| An16g04970 | strong similarity to arginine-specific carbamoyl-phosphate synthase subunit Cpa2 - <i>Saccharomyces cerevisiae</i>                    | 0 | 1173 | 18 | 34 | 26 | 17 | 11.6 | 6.7  | 1.36 |
| An02g06450 | strong similarity to hypothetical protein Afu3g10780 - <i>Aspergillus fumigatus</i>                                                   | 6 | 351  | 1  | 9  | 1  | 6  | 7.8  | 3.9  | 1.35 |
| An03g01310 | strong similarity to CTP synthase Ura7 - <i>Saccharomyces cerevisiae</i> -                                                            | 0 | 579  | 2  | 1  | 0  | 0  | 1.6  | 0.2  | 1.35 |
| An18g05590 | strong similarity to mitochondrial carrier protein Ymc1 - <i>Saccharomyces cerevisiae</i>                                             | 0 | 304  | 0  | 1  | 3  | 3  | 1.3  | 3.9  | 1.35 |
| An02g05470 | strong similarity to 49 kD subunit of NADH:ubiquinone reductase - <i>Neurospora crassa</i>                                            | 0 | 476  | 3  | 23 | 26 | 30 | 14.5 | 21.4 | 1.34 |
| An02g03940 | strong similarity to glucose repression mediator protein Ssn6 - <i>Saccharomyces cerevisiae</i> -                                     | 0 | 858  | 3  | 3  | 0  | 1  | 2.0  | 0.3  | 1.34 |
| An07g09530 | strong similarity to $\alpha$ subunit E1 of the pyruvate dehydrogenase complex Pda1 - <i>Saccharomyces cerevisiae</i>                 | 0 | 404  | 0  | 17 | 10 | 4  | 11.3 | 6.5  | 1.31 |
| An08g02700 | strong similarity to S-adenosylmethionine synthase eth-1 - <i>Neurospora crassa</i>                                                   | 0 | 387  | 16 | 13 | 9  | 19 | 19.8 | 13.3 | 1.31 |
| An07g03130 | strong similarity to mitochondrial cation transporter Mmt1 - <i>Saccharomyces cerevisiae</i>                                          | 0 | 486  | 1  | 1  | 6  | 4  | 1.3  | 3.9  | 1.31 |
| An12g00580 | weak similarity to heat shock protein dnaJ - <i>Brucella ovis</i>                                                                     | 2 | 364  | 4  | 5  | 2  | 4  | 6.8  | 3.2  | 1.30 |
| An11g04360 | strong similarity to polyribosome binding protein Scp160 - <i>Saccharomyces cerevisiae</i>                                            | 0 | 1172 | 6  | 4  | 24 | 11 | 2.3  | 5.5  | 1.29 |
| An09g02830 | strong similarity to acylaminoacyl-peptidase DPP V - <i>Aspergillus fumigatus</i>                                                     | 0 | 750  | 3  | 5  | 24 | 2  | 2.9  | 6.4  | 1.29 |
| An17g01360 | strong similarity to cytoplasmic ribosomal protein of the large subunit L8.e Pl2b - <i>Saccharomyces cerevisiae</i>                   | 0 | 254  | 6  | 2  | 5  | 1  | 8.7  | 4.6  | 1.28 |
| An06g01030 | strong similarity to hypothetical protein Afu6g14120 - <i>Aspergillus fumigatus</i>                                                   | 6 | 500  | 2  | 0  | 5  | 5  | 1.3  | 3.8  | 1.27 |
| An01g00100 | strong similarity to pyruvate dehydrogenase $\beta$ chain precursor Pdb1 - <i>Saccharomyces cerevisiae</i>                            | 0 | 374  | 1  | 31 | 16 | 16 | 22.6 | 15.7 | 1.26 |
| An07g08140 | strong similarity to cytosolic phenylalanine--tRNA ligase $\beta$ subunit Frs2 - <i>Saccharomyces cerevisiae</i>                      | 0 | 481  | 3  | 1  | 1  | 0  | 2.4  | 0.6  | 1.26 |
| An15g01780 | strong similarity to 2-methylcitrate dehydratase PrpD - <i>Salmonella typhimurium</i>                                                 | 0 | 502  | 5  | 8  | 8  | 1  | 7.0  | 3.4  | 1.26 |
| An15g06440 | strong similarity to karyopherin $\alpha$ Srp1 - <i>Saccharomyces cerevisiae</i>                                                      | 0 | 549  | 11 | 10 | 13 | 4  | 10.2 | 5.8  | 1.25 |
| An01g02880 | strong similarity to cytoplasmic ubiquitin / ribosomal fusion protein Cep52 - <i>Saccharomyces cerevisiae</i>                         | 0 | 128  | 1  | 2  | 7  | 1  | 7.1  | 12.0 | 1.25 |
| An02g09200 | strong similarity to translational factor CaYST1 - <i>Candida albicans</i>                                                            | 0 | 298  | 20 | 14 | 20 | 16 | 30.1 | 22.1 | 1.24 |
| An14g06830 | strong similarity to hypothetical membrane protein Ptm1 - <i>Saccharomyces cerevisiae</i>                                             | 7 | 536  | 0  | 5  | 10 | 7  | 2.7  | 5.9  | 1.24 |
| An01g14080 | strong similarity to cytoplasmic ribosomal protein of the small subunit Ys24 - <i>Saccharomyces cerevisiae</i>                        | 0 | 130  | 11 | 8  | 11 | 10 | 39.0 | 29.8 | 1.23 |
| An04g01310 | similarity to protein involved in regulation of the inositol biosynthesis Scs2 - <i>Saccharomyces cerevisiae</i>                      | 1 | 286  | 7  | 4  | 5  | 4  | 10.5 | 6.0  | 1.23 |
| An04g01730 | strong similarity to ubiquitin fusion degradation protein Ufd2 - <i>Saccharomyces cerevisiae</i>                                      | 0 | 1073 | 6  | 12 | 8  | 2  | 4.5  | 1.8  | 1.23 |
| An17g01945 | strong similarity to protein Rvs161 - <i>Saccharomyces cerevisiae</i>                                                                 | 0 | 261  | 2  | 5  | 2  | 3  | 7.5  | 3.8  | 1.22 |
| An04g01800 | strong similarity to proteasome 20S subunit Pup3 - <i>Saccharomyces cerevisiae</i>                                                    | 0 | 206  | 2  | 0  | 4  | 3  | 3.2  | 6.6  | 1.22 |
| An02g07930 | strong similarity to precursor of linoleate diol synthase - <i>Gaeumannomyces graminis</i>                                            | 0 | 1110 | 1  | 6  | 14 | 13 | 1.8  | 4.5  | 1.22 |
| An02g06390 | strong similarity to cytoplasmic ribosomal protein of the small subunit Rp30 - <i>Saccharomyces cerevisiae</i>                        | 0 | 200  | 17 | 12 | 12 | 20 | 38.4 | 29.3 | 1.22 |
| An02g06050 | strong similarity to cytoplasmic ribosomal protein of the small subunit S16.e - <i>Saccharomyces cerevisiae</i>                       | 0 | 143  | 5  | 11 | 8  | 9  | 30.0 | 22.1 | 1.22 |
| An16g02520 | strong similarity to threonine synthase Thr4 - <i>Saccharomyces cerevisiae</i> -                                                      | 0 | 520  | 4  | 9  | 9  | 0  | 6.8  | 3.3  | 1.22 |
| An04g06380 | strong similarity to mitochondrial aspartate aminotransferase mAspAT - <i>Mus musculus</i>                                            | 0 | 429  | 27 | 26 | 32 | 25 | 32.5 | 24.2 | 1.21 |
| An07g07000 | strong similarity to mitochondrial m-AAA protease subunit Yta12 - <i>Saccharomyces cerevisiae</i>                                     | 0 | 898  | 4  | 4  | 11 | 16 | 2.5  | 5.5  | 1.20 |
| An01g04630 | strong similarity to $\gamma$ chain precursor of the H <sup>+</sup> -transporting ATP synthase Atp3 - <i>Saccharomyces cerevisiae</i> | 0 | 297  | 2  | 3  | 7  | 7  | 4.8  | 8.8  | 1.18 |
| An13g00670 | strong similarity to mitochondrial protein Mia1 - <i>Saccharomyces cerevisiae</i> -                                                   | 0 | 135  | 1  | 2  | 1  | 1  | 6.7  | 3.3  | 1.17 |
| An16g01810 | strong similarity to histone H2A variant pht1p - <i>Schizosaccharomyces pombe</i> -                                                   | 0 | 138  | 1  | 1  | 0  | 1  | 4.7  | 2.0  | 1.17 |
| An15g00140 | similarity to transcription repressor Tup1 - <i>Saccharomyces cerevisiae</i> -                                                        | 0 | 583  | 4  | 4  | 4  | 0  | 3.8  | 1.4  | 1.16 |
| An07g08220 | strong similarity to clathrin associated epsin 2A - <i>Homo sapiens</i> -                                                             | 0 | 525  | 3  | 1  | 0  | 1  | 2.2  | 0.5  | 1.16 |

|            |                                                                                                                                     |    |      |    |    |     |     |      |      |      |
|------------|-------------------------------------------------------------------------------------------------------------------------------------|----|------|----|----|-----|-----|------|------|------|
| An04g06210 | strong similarity to homocitrate synthase lys1 - <i>Penicillium chrysogenum</i> -                                                   | 0  | 465  | 3  | 2  | 1   | 1   | 3.1  | 1.0  | 1.15 |
| An11g01640 | similarity to phospholipase C type Isc2 - <i>Saccharomyces cerevisiae</i>                                                           | 2  | 477  | 0  | 0  | 3   | 1   | 0.3  | 1.7  | 1.15 |
| An11g01770 | strong similarity to 135 kD subunit of DNA-directed RNA polymerase I - <i>Neurospora crassa</i>                                     | 0  | 1213 | 0  | 0  | 7   | 1   | 0.1  | 1.3  | 1.15 |
| An02g01510 | strong similarity to component of the endoplasmic reticulum protein translocation machinery Sec62 - <i>Saccharomyces cerevisiae</i> | 2  | 465  | 9  | 16 | 13  | 10  | 14.3 | 9.1  | 1.15 |
| An07g02160 | strong similarity to mitochondrial malate dehydrogenase Mdh1 - <i>Saccharomyces cerevisiae</i>                                      | 0  | 340  | 8  | 20 | 20  | 35  | 21.8 | 29.4 | 1.14 |
| An02g02170 | strong similarity to tryptophan synthase Trp5 - <i>Saccharomyces cerevisiae</i>                                                     | 0  | 723  | 5  | 6  | 5   | 1   | 4.1  | 1.6  | 1.14 |
| An02g10660 | strong similarity to methionine adenosyltransferase regulatory $\beta$ subunit MAT II - <i>Homo sapiens</i> -                       | 0  | 324  | 1  | 2  | 1   | 0   | 2.8  | 0.8  | 1.13 |
| An04g09030 | strong similarity to mitochondrial succinate-fumarate transporter Sfc1 - <i>Saccharomyces cerevisiae</i>                            | 0  | 325  | 0  | 2  | 2   | 6   | 2.0  | 4.7  | 1.13 |
| An08g01960 | strong similarity to adenosylhomocysteinase - <i>Homo sapiens</i>                                                                   | 0  | 449  | 28 | 19 | 76  | 13  | 27.5 | 36.0 | 1.12 |
| An14g01560 | strong similarity to zuotin Zuo1 - <i>Saccharomyces cerevisiae</i>                                                                  | 0  | 447  | 0  | 2  | 8   | 1   | 1.5  | 3.8  | 1.11 |
| An12g07020 | strong similarity to $\alpha$ -1,6-mannosyltransferase Hoc1 - <i>Saccharomyces cerevisiae</i>                                       | 1  | 421  | 0  | 3  | 6   | 5   | 2.2  | 4.9  | 1.11 |
| An11g10150 | strong similarity to phosphoribosylaminoimidazolesuccinocarboxamide synthase Ade1 - <i>S.cerevisiae</i>                             | 0  | 300  | 2  | 2  | 2   | 0   | 3.9  | 1.5  | 1.10 |
| An15g06790 | strong similarity to suppressor of the septation mutant cdc11 sce3p - <i>Schizosaccharomyces pombe</i> -                            | 0  | 489  | 4  | 1  | 2   | 0   | 2.9  | 0.9  | 1.10 |
| An04g02540 | similarity to bladder tumour EST encoded protein 16 from patent DE19818619-A1 - <i>Homo sapiens</i> -                               | 1  | 491  | 1  | 4  | 1   | 1   | 2.9  | 0.9  | 1.09 |
| An11g07010 | strong similarity to alkane-inducible cytochrome P450 alk2 - <i>Candida tropicalis</i>                                              | 0  | 502  | 2  | 4  | 16  | 2   | 3.4  | 6.6  | 1.09 |
| An01g06370 | strong similarity to hypothetical protein YKR065c - <i>Saccharomyces cerevisiae</i>                                                 | 2  | 248  | 1  | 0  | 3   | 2   | 1.6  | 4.0  | 1.09 |
| An08g04280 | similarity to polyadenylated RNA-binding protein Pub1 - <i>Saccharomyces cerevisiae</i> -                                           | 0  | 497  | 3  | 2  | 2   | 0   | 2.9  | 0.9  | 1.08 |
| An13g00320 | strong similarity to hypothetical protein Afu7g03900 - <i>Aspergillus fumigatus</i>                                                 | 4  | 432  | 0  | 3  | 1   | 10  | 2.1  | 4.8  | 1.08 |
| An11g04510 | strong similarity to suppressor 2 Sup2 - <i>Saccharomyces cerevisiae</i>                                                            | 0  | 727  | 1  | 1  | 10  | 1   | 0.9  | 2.9  | 1.08 |
| An08g01640 | strong similarity to small glutamine-rich tetratricopeptide protein SGT - <i>Homo sapiens</i> -                                     | 0  | 341  | 2  | 1  | 1   | 0   | 2.7  | 0.8  | 1.07 |
| An12g01260 | strong similarity to nitrilase NIT1 - <i>Arabidopsis thaliana</i>                                                                   | 0  | 320  | 4  | 7  | 11  | 14  | 9.4  | 14.4 | 1.07 |
| An02g12980 | strong similarity to cis-Golgi t-SNARE Sed5 - <i>Saccharomyces cerevisiae</i> -                                                     | 1  | 343  | 2  | 1  | 0   | 1   | 2.7  | 0.8  | 1.07 |
| An02g11420 | dipeptidyl aminopeptidase type IV dapB - <i>Aspergillus niger</i>                                                                   | 1  | 901  | 0  | 0  | 5   | 1   | 0.1  | 1.3  | 1.06 |
| An11g06670 | strong similarity to $\alpha$ subunit of assimilatory sulfite reductase Met10 - <i>Saccharomyces cerevisiae</i> -                   | 0  | 1045 | 10 | 10 | 13  | 0   | 5.1  | 2.3  | 1.06 |
| An02g03120 | strong similarity to GDP dissociation inhibitor in the secretory pathway Gdi1 - <i>Saccharomyces cerevisiae</i>                     | 0  | 468  | 0  | 2  | 8   | 1   | 1.4  | 3.7  | 1.06 |
| An08g00210 | strong similarity to glycerol-3-phosphate dehydrogenase gdm1 - <i>Mus musculus</i>                                                  | 1  | 704  | 8  | 32 | 43  | 39  | 15.0 | 21.1 | 1.06 |
| An03g06670 | weak similarity to myosin-like protein Mlp1 - <i>Saccharomyces cerevisiae</i>                                                       | 0  | 2080 | 28 | 94 | 120 | 128 | 15.3 | 21.6 | 1.06 |
| An02g07320 | strong similarity to AU-specific RNA-binding protein / enoyl-CoA hydratase AUH - <i>Homo sapiens</i> -                              | 0  | 302  | 3  | 2  | 0   | 3   | 4.7  | 2.1  | 1.05 |
| An08g07520 | strong similarity to levodione reductase lvr - <i>Corynebacterium aquaticum</i> -                                                   | 0  | 314  | 2  | 2  | 0   | 2   | 3.7  | 1.4  | 1.05 |
| An02g03090 | similarity to Not2p - <i>Homo sapiens</i>                                                                                           | 0  | 523  | 0  | 0  | 3   | 1   | 0.2  | 1.6  | 1.05 |
| 203715     | strong similarity to outer mitochondrial membrane protein porin [ <i>Aspergillus clavatus</i> NRRL 1]                               | 0  | 350  | 7  | 34 | 29  | 47  | 30.9 | 39.4 | 1.05 |
| An14g00810 | strong similarity to hypothetical protein EAA61688.1 - <i>Aspergillus nidulans</i>                                                  | 0  | 343  | 0  | 0  | 2   | 1   | 0.4  | 1.8  | 1.05 |
| An17g01530 | alcohol-dehydrogenase adhA from patent WO8704464-A - <i>Aspergillus niger</i> -                                                     | 0  | 350  | 2  | 1  | 0   | 1   | 2.6  | 0.8  | 1.05 |
| An04g05270 | strong similarity to transcription activator Adr1 - <i>Saccharomyces cerevisiae</i>                                                 | 0  | 327  | 4  | 6  | 7   | 1   | 8.4  | 4.7  | 1.05 |
| An04g01260 | strong similarity to golgi $\alpha$ -1,6 mannosyltransferase subunit Anp1 - <i>Saccharomyces cerevisiae</i>                         | 0  | 411  | 4  | 20 | 31  | 18  | 15.5 | 21.7 | 1.04 |
| An18g03570 | $\beta$ -glucosidase bgl1 - <i>Aspergillus niger</i>                                                                                | 0  | 860  | 3  | 15 | 33  | 12  | 5.6  | 9.5  | 1.04 |
| An01g08410 | strong similarity to polypeptide HFIZG53 from patent EP892050-A2 - <i>Homo sapiens</i>                                              | 0  | 242  | 0  | 2  | 5   | 2   | 2.7  | 5.6  | 1.04 |
| An13g00840 | strong similarity to general amino acid permease Gap1 - <i>Saccharomyces cerevisiae</i>                                             | 12 | 585  | 4  | 10 | 14  | 20  | 6.5  | 10.6 | 1.04 |
| An14g01140 | strong similarity to guanine deaminase Gda - <i>Mus musculus</i> [putative frameshift]                                              | 1  | 531  | 0  | 0  | 3   | 1   | 0.2  | 1.5  | 1.03 |

|            |                                                                                                            |   |      |    |    |    |    |      |      |      |
|------------|------------------------------------------------------------------------------------------------------------|---|------|----|----|----|----|------|------|------|
| An18g05070 | strong similarity to 26S proteasome subunit 9 - Homo sapiens                                               | 0 | 424  | 10 | 8  | 8  | 8  | 11.4 | 7.0  | 1.03 |
| An18g02680 | strong similarity to cytochrome P450 monooxygenase avnA - Aspergillus parasiticus                          | 1 | 493  | 15 | 33 | 24 | 27 | 25.6 | 18.8 | 1.03 |
| An02g04860 | strong similarity to cytochrome-b5 reductase - Saccharomyces cerevisiae                                    | 0 | 305  | 4  | 13 | 20 | 15 | 14.9 | 21.0 | 1.03 |
| An12g07790 | strong similarity to transcription factor btf3p - Schizosaccharomyces pombe-                               | 0 | 155  | 1  | 2  | 2  | 0  | 5.9  | 2.9  | 1.02 |
| An14g04160 | strong similarity to cofilin Cof1 - Saccharomyces cerevisiae-                                              | 0 | 155  | 1  | 2  | 2  | 0  | 5.9  | 2.9  | 1.02 |
| An11g05700 | similarity to hypothetical membrane protein YGR235c - Saccharomyces cerevisiae                             | 0 | 252  | 0  | 4  | 4  | 7  | 4.6  | 8.2  | 1.01 |
| An02g11810 | strong similarity to hypothetical conserved protein 12F11.50 - Neurospora crassa                           | 7 | 551  | 0  | 0  | 1  | 3  | 0.2  | 1.5  | 1.00 |
| An11g07970 | strong similarity to hypothetical protein SPBC16H5.12c - Schizosaccharomyces pombe                         | 0 | 702  | 16 | 5  | 29 | 19 | 8.0  | 12.5 | 1.00 |
| An04g03750 | strong similarity to hypothetical protein YMR099c - Saccharomyces cerevisiae-                              | 0 | 320  | 2  | 3  | 3  | 0  | 4.5  | 2.0  | 1.00 |
| An15g02490 | similarity to 3-isopropylmalate dehydrogenase leuB - Sulfolobus sp.                                        | 0 | 361  | 0  | 0  | 1  | 2  | 0.4  | 1.7  | 1.00 |
| An08g10480 | strong similarity to cytoplasmic ribosomal protein of the large subunit L7 - Schizosaccharomyces pombe     | 0 | 263  | 23 | 35 | 35 | 34 | 57.9 | 47.7 | 0.99 |
| An11g09120 | strong similarity to cytoplasmic ribosomal protein of the large subunit L26 - Saccharomyces cerevisiae     | 0 | 134  | 5  | 8  | 8  | 6  | 26.2 | 19.5 | 0.98 |
| 46101      | weak similarity to predicted protein [Aspergillus terreus NIH2624]                                         | 1 | 278  | 0  | 1  | 3  | 2  | 1.4  | 3.6  | 0.97 |
| An04g02050 | similarity to hypoxia-induced protein #21 from patent WO200246465-A2 - Homo sapiens-                       | 5 | 348  | 2  | 2  | 1  | 1  | 3.4  | 1.3  | 0.95 |
| An08g04880 | strong similarity to hypothetical protein CAD27304.1 - Aspergillus fumigatus                               | 3 | 263  | 0  | 3  | 3  | 6  | 3.5  | 6.5  | 0.95 |
| An16g02490 | strong similarity to $\beta$ -adaptn BAD1 - Drosophila melanogaster-                                       | 0 | 748  | 3  | 4  | 0  | 3  | 2.6  | 0.8  | 0.95 |
| An07g05110 | strong similarity to septin aspA - Aspergillus nidulans                                                    | 0 | 379  | 5  | 1  | 14 | 2  | 4.5  | 7.9  | 0.95 |
| An04g08730 | strong similarity to hypothetical conserved protein SPAC12B10.16c - Schizosaccharomyces pombe              | 0 | 536  | 0  | 6  | 1  | 2  | 3.2  | 1.2  | 0.94 |
| An01g04430 | strong similarity to translation initiation factor eIF-3 - Schizosaccharomyces pombe                       | 0 | 1052 | 16 | 15 | 44 | 26 | 7.8  | 12.1 | 0.94 |
| An01g09590 | strong similarity to voltage-gated potassium channel $\beta$ subunit Kv $\beta$ 1 - Rattus norvegicus-     | 0 | 341  | 3  | 2  | 0  | 3  | 4.2  | 1.9  | 0.93 |
| An03g03640 | strong similarity to mitochondrial sulfide dehydrogenase (coenzyme Q2) SPBC2G5.06c - S. pombe              | 0 | 527  | 3  | 8  | 11 | 16 | 5.7  | 9.4  | 0.93 |
| An01g08430 | strong similarity to methylmalonate-semialdehyde dehydrogenase MMSDH - Rattus norvegicus                   | 0 | 600  | 1  | 18 | 5  | 11 | 8.5  | 5.0  | 0.92 |
| An01g08870 | strong similarity to component of COPII-coated vesicles Erv25 - Saccharomyces cerevisiae                   | 1 | 211  | 5  | 8  | 15 | 11 | 16.7 | 22.7 | 0.92 |
| An04g05260 | strong similarity to saccharopine reductase LYS3 - Magnaporthe grisea                                      | 0 | 448  | 0  | 1  | 5  | 1  | 0.9  | 2.6  | 0.91 |
| An08g01480 | strong similarity to tRNA ligase Trl1 - Saccharomyces cerevisiae                                           | 0 | 821  | 0  | 0  | 5  | 0  | 0.2  | 1.2  | 0.91 |
| An01g13530 | strong similarity to protein involved in the attachment of GPI-anchors to proteins Gpi8 - S. cerevisiae    | 0 | 402  | 1  | 2  | 1  | 0  | 2.3  | 0.7  | 0.91 |
| An04g08330 | strong similarity to orotidine-5-monophosphate pyrophosphorylase - Ajellomyces capsulatus [truncated ORF]- | 0 | 191  | 3  | 2  | 4  | 0  | 7.5  | 4.3  | 0.91 |
| An08g03590 | strong similarity to precursor of protein Emp24 - Saccharomyces cerevisiae                                 | 0 | 203  | 2  | 7  | 12 | 7  | 12.2 | 17.3 | 0.90 |
| An14g00370 | strong similarity to cytoplasmic ribosomal protein of the large subunit L13 - Rattus norvegicus            | 0 | 225  | 13 | 5  | 11 | 8  | 21.4 | 15.6 | 0.90 |
| An16g05420 | strong similarity to glucose-6-phosphate isomerase Pgi1 - Saccharomyces cerevisiae                         | 0 | 553  | 35 | 28 | 58 | 12 | 29.9 | 23.0 | 0.90 |
| An16g02460 | strong similarity to $\alpha$ subunit of the coatomer complex Ret1 - Saccharomyces cerevisiae              | 0 | 1206 | 15 | 30 | 26 | 14 | 9.8  | 6.1  | 0.90 |
| An01g08960 | strong similarity to iron transport multicopper oxidase Fet3 - Candida albicans                            | 1 | 613  | 0  | 0  | 1  | 3  | 0.2  | 1.3  | 0.90 |
| An12g02120 | similarity to hypothetical mold-specific protein MS8 - Ajellomyces capsulatus                              | 0 | 353  | 3  | 3  | 2  | 2  | 4.8  | 2.3  | 0.90 |
| An07g05920 | strong similarity to estrogen receptor-binding cyclophilin cypD - Bos primigenius taurus                   | 0 | 372  | 2  | 7  | 6  | 1  | 6.6  | 3.6  | 0.89 |
| An02g13220 | strong similarity to lysophospholipase phospholipase B - Penicillium notatum                               | 0 | 640  | 1  | 3  | 9  | 5  | 1.8  | 4.1  | 0.88 |
| An08g02280 | strong similarity to hypothetical protein YKR018c - Saccharomyces cerevisiae-                              | 0 | 692  | 1  | 3  | 1  | 0  | 1.7  | 0.4  | 0.88 |
| An07g01340 | weak similarity to phosphoenolpyruvate carboxylase - Escherichia coli                                      | 0 | 346  | 17 | 8  | 20 | 6  | 19.2 | 13.8 | 0.88 |
| An18g05810 | strong similarity to cytoplasmic ribosomal protein of the small subunit S26 - Homo sapiens                 | 0 | 119  | 1  | 3  | 4  | 5  | 9.8  | 14.4 | 0.86 |
| An18g02020 | disulfide isomerase tigA - Aspergillus niger                                                               | 0 | 359  | 16 | 29 | 25 | 26 | 33.0 | 25.9 | 0.86 |
| An05g01350 | strong similarity to hypothetical protein AN2579.2 - Aspergillus nidulans                                  | 1 | 419  | 0  | 0  | 2  | 1  | 0.3  | 1.5  | 0.86 |

|            |                                                                                                                      |   |      |    |    |     |    |      |      |      |
|------------|----------------------------------------------------------------------------------------------------------------------|---|------|----|----|-----|----|------|------|------|
| An14g01050 | similarity to serine/threonine protein kinase Yak1 - <i>Saccharomyces cerevisiae</i> -                               | 0 | 895  | 4  | 2  | 0   | 2  | 1.9  | 0.5  | 0.85 |
| An18g05050 | strong similarity to hypothetical protein encoded by B7F18.130 - <i>Neurospora crassa</i> -                          | 7 | 388  | 1  | 3  | 0   | 2  | 3.0  | 1.2  | 0.85 |
| An18g06250 | strong similarity to phosphopyruvate hydratase ENO1 - <i>Candida albicans</i>                                        | 0 | 438  | 8  | 5  | 26  | 3  | 8.0  | 12.1 | 0.85 |
| An11g03480 | strong similarity to hypothetical protein encoded by An01g01140 - <i>Aspergillus niger</i> -                         | 0 | 434  | 1  | 2  | 1   | 0  | 2.1  | 0.6  | 0.84 |
| An04g03130 | strong similarity to mannosylation protein Lec35 - <i>Cricetulus griseus</i> [putative sequencing error]             | 2 | 299  | 1  | 1  | 5   | 2  | 2.2  | 4.5  | 0.84 |
| An04g01520 | similarity to nuclear envelope protein cut11p - <i>Schizosaccharomyces pombe</i>                                     | 0 | 565  | 6  | 3  | 1   | 5  | 4.4  | 2.1  | 0.84 |
| An11g10070 | strong similarity to hypothetical protein Afu3g06270 - <i>Aspergillus fumigatus</i>                                  | 0 | 323  | 0  | 1  | 2   | 3  | 1.2  | 3.1  | 0.84 |
| An05g01770 | strong similarity to hypothetical protein Afu6g14020 - <i>Aspergillus fumigatus</i>                                  | 1 | 438  | 1  | 1  | 5   | 3  | 1.5  | 3.5  | 0.84 |
| An04g05320 | strong similarity to hypothetical protein TEMO - <i>Rattus norvegicus</i>                                            | 0 | 1963 | 0  | 3  | 15  | 4  | 0.5  | 1.8  | 0.83 |
| An15g05740 | strong similarity to GTP-binding protein Rab6 - <i>Homo sapiens</i>                                                  | 0 | 209  | 4  | 12 | 3   | 14 | 20.5 | 15.1 | 0.83 |
| An01g03580 | strong similarity to cytoplasmic ribosomal protein of the large subunit L18a Rpl20 - <i>Saccharomyces cerevisiae</i> | 0 | 198  | 15 | 15 | 21  | 14 | 40.1 | 32.3 | 0.83 |
| An08g04450 | similarity to hypothetical guanosine-diphosphatase - <i>Schizosaccharomyces pombe</i>                                | 1 | 561  | 6  | 13 | 23  | 18 | 9.0  | 13.3 | 0.83 |
| An14g01590 | strong similarity to sterol transmethylase ERG6 - <i>Candida albicans</i>                                            | 0 | 377  | 14 | 18 | 35  | 25 | 22.4 | 28.9 | 0.83 |
| An17g00090 | weak similarity to translocation protein Sec72 - <i>Saccharomyces cerevisiae</i>                                     | 0 | 194  | 0  | 3  | 3   | 5  | 4.7  | 7.9  | 0.83 |
| An18g03480 | strong similarity to sterol $\delta$ 14 15-reductase erg-3 - <i>Neurospora crassa</i>                                | 8 | 497  | 0  | 1  | 2   | 4  | 0.8  | 2.4  | 0.82 |
| An04g09130 | similarity to peroxisomal membrane protein PMP22 - <i>Arabidopsis thaliana</i>                                       | 3 | 224  | 2  | 4  | 1   | 4  | 7.6  | 4.4  | 0.82 |
| An11g09690 | strong similarity to proteasome 19S regulatory particle subunit Rpn5 - <i>Saccharomyces cerevisiae</i>               | 0 | 488  | 7  | 8  | 8   | 5  | 8.3  | 5.0  | 0.82 |
| An15g02200 | strong similarity to alcohol oxidase AOD1 - <i>Candida boidinii</i> -                                                | 0 | 602  | 6  | 16 | 20  | 0  | 9.7  | 6.1  | 0.82 |
| An07g07520 | strong similarity to vacuolar alkaline phosphatase Pho8 - <i>Saccharomyces cerevisiae</i>                            | 1 | 595  | 6  | 10 | 18  | 18 | 7.2  | 11.1 | 0.82 |
| An02g12140 | glucose-6-phosphate 1-dehydrogenase gsdA - <i>Aspergillus niger</i>                                                  | 0 | 510  | 14 | 14 | 17  | 11 | 14.5 | 10.1 | 0.81 |
| An11g11210 | strong similarity to ATP-dependent RNA helicase ste13p - <i>Schizosaccharomyces pombe</i>                            | 0 | 505  | 1  | 0  | 5   | 1  | 0.8  | 2.3  | 0.81 |
| An08g04070 | strong similarity to mitochondrial receptor complex chain MOM22 - <i>Neurospora crassa</i>                           | 0 | 153  | 3  | 5  | 3   | 5  | 14.5 | 10.0 | 0.81 |
| An01g07190 | strong similarity to component of the translocase of mitochondrial inner membrane Tim54 - <i>S. cerevisiae</i>       | 0 | 447  | 0  | 0  | 2   | 1  | 0.3  | 1.4  | 0.80 |
| An18g04730 | strong similarity to hypothetical protein SPCC622.11 - <i>Schizosaccharomyces pombe</i>                              | 9 | 687  | 0  | 0  | 2   | 2  | 0.2  | 1.2  | 0.80 |
| An02g13450 | weak similarity to protein CAP59 - <i>Cryptococcus neoformans</i>                                                    | 1 | 794  | 1  | 1  | 7   | 3  | 0.8  | 2.4  | 0.80 |
| An01g01820 | catalase R catR - <i>Aspergillus niger</i>                                                                           | 0 | 730  | 6  | 24 | 21  | 41 | 10.9 | 15.4 | 0.80 |
| An07g08990 | pyruvate kinase pkiA - <i>Aspergillus niger</i>                                                                      | 0 | 526  | 15 | 8  | 12  | 10 | 11.6 | 7.7  | 0.80 |
| An09g06590 | heat shock protein sspB - <i>Aspergillus niger</i>                                                                   | 0 | 702  | 65 | 61 | 106 | 44 | 46.9 | 38.7 | 0.79 |
| An18g02700 | similarity to cytochrome P-450 cyp509A1 - <i>Cunninghamella elegans</i>                                              | 1 | 529  | 2  | 9  | 20  | 6  | 5.7  | 9.0  | 0.78 |
| An16g05570 | strong similarity to aspartate transaminase - <i>Sus scrofa</i>                                                      | 0 | 419  | 11 | 11 | 15  | 7  | 14.0 | 9.7  | 0.78 |
| An18g01200 | strong similarity to O-methylsterigmatocystin oxidoreductase ord1 - <i>Aspergillus flavus</i>                        | 0 | 527  | 1  | 0  | 3   | 3  | 0.7  | 2.2  | 0.78 |
| An04g08980 | strong similarity to cytoplasmic ribosomal protein of the large subunit L43a - <i>Saccharomyces cerevisiae</i>       | 0 | 92   | 0  | 2  | 3   | 2  | 7.1  | 10.8 | 0.78 |
| An02g07570 | strong similarity to ergosterol biosynthesis protein Kes1 - <i>Saccharomyces cerevisiae</i>                          | 0 | 415  | 2  | 4  | 3   | 1  | 4.1  | 2.0  | 0.76 |
| An09g06750 | strong similarity to hypothetical protein B13I18.120 - <i>Neurospora crassa</i>                                      | 0 | 277  | 3  | 11 | 14  | 14 | 13.6 | 18.6 | 0.76 |
| An16g01870 | strong similarity to mRNA cleavage factor I 25 kDa subunit CFIM25 - <i>Homo sapiens</i>                              | 0 | 277  | 3  | 5  | 3   | 4  | 8.0  | 4.9  | 0.76 |
| An11g09570 | strong similarity to cytoplasmic ribosomal protein of the large subunit L37.b - <i>Saccharomyces cerevisiae</i>      | 0 | 95   | 1  | 1  | 3   | 2  | 6.8  | 10.4 | 0.75 |
| An05g00900 | strong similarity to hypothetical protein SPAC32A11.02c - <i>Schizosaccharomyces pombe</i>                           | 0 | 748  | 0  | 1  | 4   | 3  | 0.5  | 1.8  | 0.75 |
| An11g10380 | strong similarity to 26S proteasome regulatory subunit rpn3p - <i>Schizosaccharomyces pombe</i> -                    | 0 | 645  | 6  | 1  | 4   | 0  | 3.0  | 1.3  | 0.75 |
| An02g00890 | strong similarity to phosphoserine transaminase Ser1 - <i>Saccharomyces cerevisiae</i> -                             | 0 | 424  | 4  | 1  | 3   | 0  | 3.4  | 1.5  | 0.75 |
| An16g09320 | strong similarity to cytosolic alanine--tRNA ligase Ala1 - <i>Saccharomyces cerevisiae</i>                           | 0 | 961  | 9  | 8  | 39  | 2  | 4.7  | 7.8  | 0.75 |

|            |                                                                                                                                     |    |      |     |    |     |    |      |      |      |
|------------|-------------------------------------------------------------------------------------------------------------------------------------|----|------|-----|----|-----|----|------|------|------|
| An07g04940 | strong similarity to $\alpha$ -1,6-mannosyltransferase Hoc1 - <i>Saccharomyces cerevisiae</i>                                       | 0  | 362  | 0   | 1  | 4   | 1  | 1.1  | 2.7  | 0.75 |
| An08g05580 | strong similarity to precursor of isocitrate dehydrogenase (NAD <sup>+</sup> ) chain Idh2 - <i>Saccharomyces cerevisiae</i>         | 0  | 438  | 1   | 21 | 8   | 14 | 13.4 | 9.3  | 0.75 |
| An13g00440 | strong similarity to uridine-monophosphate kinase Ura6 - <i>Saccharomyces cerevisiae</i> -                                          | 0  | 212  | 1   | 2  | 2   | 0  | 4.3  | 2.1  | 0.75 |
| An14g04920 | triose-phosphate-isomerase tpiA from patent WO8704464-A - <i>Aspergillus niger</i> -                                                | 0  | 249  | 2   | 3  | 12  | 0  | 5.7  | 9.1  | 0.75 |
| An07g09170 | strong similarity to breast cancer resistance protein 1 BCRP1 - <i>Mus musculus</i>                                                 | 7  | 1034 | 2   | 4  | 13  | 7  | 1.6  | 3.6  | 0.74 |
| An04g02060 | strong similarity to 5-aminoimidazole-4-carboxamide ribotide transformylase Ade17 - <i>S. cerevisiae</i>                            | 0  | 646  | 16  | 11 | 23  | 3  | 11.1 | 7.4  | 0.74 |
| An01g09500 | strong similarity to cytosolic threonine--tRNA ligase Ths1 - <i>Saccharomyces cerevisiae</i>                                        | 0  | 718  | 6   | 8  | 25  | 8  | 5.3  | 8.4  | 0.74 |
| An04g01080 | strong similarity to ribonucleotide reductase from patent JP10014582-A - <i>Homo sapiens</i>                                        | 0  | 865  | 2   | 0  | 9   | 1  | 0.8  | 2.2  | 0.73 |
| An02g02750 | strong similarity to catalase cta1p - <i>Schizosaccharomyces pombe</i> -                                                            | 0  | 501  | 2   | 1  | 0   | 1  | 1.8  | 0.5  | 0.73 |
| An08g01410 | strong similarity to ER-Golgi transport protein Sft2 - <i>Saccharomyces cerevisiae</i> -                                            | 4  | 217  | 2   | 1  | 0   | 2  | 4.2  | 2.1  | 0.73 |
| An04g01750 | strong similarity to 5-methyltetrahydropteroyltriglutamate--homocysteine S-methyltransferase Met6 - <i>Saccharomyces cerevisiae</i> | 0  | 774  | 105 | 77 | 179 | 45 | 61.4 | 52.3 | 0.72 |
| An02g10450 | strong similarity to GTP-binding protein Vps1 - <i>Saccharomyces cerevisiae</i>                                                     | 0  | 697  | 9   | 16 | 22  | 30 | 9.5  | 13.6 | 0.72 |
| An17g02390 | strong similarity to cytoplasmic ribosomal protein of the small subunit Rp10b - <i>Saccharomyces cerevisiae</i>                     | 0  | 256  | 19  | 16 | 21  | 20 | 36.1 | 29.2 | 0.72 |
| An17g01670 | strong similarity to succinyl coenzyme A synthase $\alpha$ subunit SYRTSA - <i>Rattus norvegicus</i>                                | 0  | 332  | 6   | 4  | 4   | 5  | 8.2  | 5.2  | 0.71 |
| An11g09350 | strong similarity to mitochondrial NADH dehydrogenase ndh64 - <i>Neurospora crassa</i>                                              | 3  | 700  | 1   | 1  | 1   | 8  | 0.9  | 2.4  | 0.71 |
| An12g04660 | strong similarity to thiamin-phosphate pyrophosphorylase/hydroxyethylthiazole kinase Thi6 - <i>S. cerevisiae</i>                    | 0  | 519  | 0   | 2  | 6   | 2  | 1.3  | 3.0  | 0.71 |
| An09g06330 | similarity to protein fragment SEQ ID NO:5981 from patent EP1108790-A2 - <i>Corynebacterium glutamicum</i>                          | 3  | 679  | 3   | 7  | 4   | 3  | 4.0  | 2.0  | 0.70 |
| An02g02830 | strong similarity to protein RER1 - <i>Homo sapiens</i>                                                                             | 3  | 189  | 7   | 6  | 8   | 6  | 18.6 | 13.8 | 0.70 |
| An08g02460 | strong similarity to SNARE protein of Golgi compartment Gos1 - <i>Saccharomyces cerevisiae</i> -                                    | 1  | 227  | 1   | 2  | 0   | 2  | 4.0  | 2.0  | 0.70 |
| An03g04940 | strong similarity to Erv41 - <i>Saccharomyces cerevisiae</i>                                                                        | 0  | 399  | 7   | 4  | 12  | 12 | 7.5  | 11.1 | 0.69 |
| An04g02130 | similarity to U1 and U2 snRNPs component SmB - <i>Homo sapiens</i>                                                                  | 0  | 220  | 1   | 0  | 3   | 1  | 1.8  | 3.7  | 0.69 |
| An02g04690 | strong similarity to serine-type carboxypeptidase I cdpS - <i>Aspergillus saitoi</i> [putative sequencing error]                    | 0  | 524  | 0   | 0  | 2   | 1  | 0.2  | 1.2  | 0.69 |
| An11g01510 | similarity to the protein involved in sister chromatid segregation Src1 - <i>Saccharomyces cerevisiae</i>                           | 1  | 733  | 2   | 4  | 2   | 1  | 2.3  | 0.9  | 0.69 |
| An16g08570 | strong similarity to translation initiation factor 3 47 kDa subunit stt3p - <i>Schizosaccharomyces pombe</i>                        | 13 | 741  | 15  | 17 | 43  | 21 | 11.4 | 15.7 | 0.68 |
| An07g03680 | strong similarity to repressor protein qutR - <i>Aspergillus nidulans</i> -                                                         | 6  | 272  | 3   | 3  | 0   | 5  | 6.2  | 3.6  | 0.68 |
| An07g01960 | strong similarity to stearyl-CoA desaturase P-ole1 - <i>Pichia angusta</i>                                                          | 3  | 456  | 13  | 32 | 29  | 22 | 26.0 | 20.4 | 0.68 |
| An02g08100 | strong similarity to translin-like protein TRAX - <i>Gallus gallus</i> -                                                            | 0  | 235  | 2   | 1  | 1   | 1  | 3.9  | 1.9  | 0.67 |
| An15g06740 | strong similarity to cytoplasmic ribosomal protein of the large subunit L32 - <i>Drosophila subobscura</i>                          | 0  | 179  | 11  | 5  | 12  | 6  | 24.0 | 18.6 | 0.67 |
| An03g06950 | strong similarity to dynamin-related protein Dnm1 - <i>Saccharomyces cerevisiae</i>                                                 | 0  | 798  | 11  | 20 | 3   | 27 | 10.3 | 6.9  | 0.67 |
| An01g03160 | strong similarity to cytoplasmic ribosomal protein of the large subunit S8 - <i>Rattus norvegicus</i>                               | 0  | 200  | 8   | 9  | 9   | 10 | 22.8 | 17.6 | 0.67 |
| An06g01900 | similarity to polyphosphoinositide binding protein Ssh2p - <i>Glycine max</i>                                                       | 0  | 475  | 2   | 4  | 1   | 3  | 3.6  | 1.7  | 0.67 |
| An07g03920 | strong similarity to bile acid transporter Ybt1 - <i>Saccharomyces cerevisiae</i>                                                   | 16 | 1643 | 6   | 22 | 41  | 25 | 4.5  | 7.3  | 0.66 |
| An01g01000 | similarity to hypothetical protein BAC11036.1 - <i>Homo sapiens</i>                                                                 | 1  | 410  | 1   | 0  | 4   | 1  | 1.0  | 2.4  | 0.66 |
| An03g02990 | similarity to $\alpha$ -N-acetylglucosamine transferase GNT1 - <i>Kluyveromyces lactis</i>                                          | 0  | 410  | 1   | 0  | 4   | 1  | 1.0  | 2.4  | 0.66 |
| An08g10400 | strong similarity to UDP-galactose transport protein SpUGT - <i>Schizosaccharomyces pombe</i>                                       | 8  | 410  | 1   | 0  | 1   | 4  | 1.0  | 2.4  | 0.66 |
| An17g00880 | strong similarity to endometrium tumour EST encoded protein 137 from patent DE19817948-A1 - <i>H. sapiens</i>                       | 0  | 483  | 2   | 3  | 3   | 0  | 3.0  | 1.3  | 0.66 |
| An16g01820 | strong similarity to hypothetical inorganic phosphate transporter and regulator of Pho81p Pho88 - <i>Saccharomyces cerevisiae</i>   | 1  | 203  | 15  | 25 | 21  | 28 | 51.9 | 44.0 | 0.66 |
| An08g03270 | strong similarity to $\beta$ -COP Sec26 - <i>Saccharomyces cerevisiae</i>                                                           | 0  | 955  | 20  | 5  | 9   | 13 | 6.9  | 4.3  | 0.66 |

|            |                                                                                                                   |    |      |    |    |    |    |      |      |      |
|------------|-------------------------------------------------------------------------------------------------------------------|----|------|----|----|----|----|------|------|------|
| An02g09350 | strong similarity to sulfate transport protein shst2 - <i>Stylosanthes hamata</i>                                 | 10 | 730  | 6  | 5  | 2  | 6  | 4.1  | 2.1  | 0.66 |
| An15g01510 | strong similarity to P-type ATPase Drs2 - <i>Saccharomyces cerevisiae</i>                                         | 9  | 1193 | 0  | 2  | 7  | 4  | 0.5  | 1.7  | 0.66 |
| An08g00600 | similarity to glutaredoxin - <i>Oryza sativa</i> -                                                                | 1  | 252  | 1  | 3  | 1  | 2  | 4.6  | 2.5  | 0.65 |
| An11g01120 | strong similarity to NADPH-dependent aldehyde reductase - <i>Sporobolomyces salmonicolor</i>                      | 0  | 381  | 4  | 5  | 17 | 3  | 6.5  | 9.7  | 0.64 |
| An14g00900 | strong similarity to glycosylphosphatidylinositol anchor synthesis protein Mcd4 - <i>Saccharomyces cerevisiae</i> | 13 | 996  | 5  | 10 | 5  | 6  | 4.1  | 2.1  | 0.64 |
| An11g11280 | strong similarity to dihydrolipoamide succinyltransferase kgd2 - <i>Aspergillus fumigatus</i>                     | 0  | 469  | 7  | 1  | 11 | 8  | 4.7  | 7.5  | 0.64 |
| An01g09480 | strong similarity to phosphatidylserine synthase pS232 - <i>Triticum aestivum</i>                                 | 4  | 236  | 0  | 1  | 3  | 1  | 1.7  | 3.4  | 0.64 |
| An07g09570 | strong similarity to phosphatidate cytidyltransferase Cds1 - <i>Saccharomyces cerevisiae</i>                      | 8  | 453  | 2  | 5  | 14 | 3  | 4.3  | 7.0  | 0.63 |
| An09g05970 | strong similarity to cytosolic glutamate--tRNA ligase - <i>Arabidopsis thaliana</i>                               | 0  | 712  | 4  | 2  | 13 | 4  | 2.4  | 4.4  | 0.63 |
| An17g02180 | similarity to hypothetical eIF-3 p110 subunit - <i>Caenorhabditis elegans</i>                                     | 4  | 255  | 1  | 2  | 4  | 4  | 3.6  | 6.0  | 0.63 |
| An04g03495 | similarity to oligosaccharyltransferase $\delta$ subunit Swp1 - <i>Saccharomyces cerevisiae</i>                   | 4  | 287  | 8  | 10 | 19 | 15 | 16.8 | 21.7 | 0.63 |
| An16g02210 | strong similarity to proteasome 19S regulatory particle subunit Rpn12 - <i>Saccharomyces cerevisiae</i> -         | 0  | 278  | 2  | 3  | 4  | 0  | 5.1  | 2.9  | 0.62 |
| An01g03120 | strong similarity to phosphate transport protein Pho90 - <i>Saccharomyces cerevisiae</i>                          | 12 | 881  | 0  | 0  | 3  | 1  | 0.1  | 0.9  | 0.62 |
| 53357      | strong similarity to aldehyde dehydrogenase [ <i>Aspergillus terreus</i> NIH2624]                                 | 0  | 513  | 5  | 2  | 5  | 0  | 3.8  | 1.9  | 0.62 |
| An02g06300 | similarity to naaladase II - <i>Homo sapiens</i> -                                                                | 1  | 888  | 0  | 0  | 2  | 2  | 0.1  | 0.9  | 0.62 |
| An17g02340 | strong similarity to cytosolic serine--tRNA ligase Ses1 - <i>Saccharomyces cerevisiae</i>                         | 0  | 474  | 6  | 8  | 10 | 3  | 8.0  | 5.1  | 0.61 |
| 42743      | strong similarity to methyltransferase family protein [ <i>Aspergillus flavus</i> NRRL3357]                       | 0  | 263  | 11 | 8  | 19 | 2  | 19.3 | 14.7 | 0.61 |
| An01g10460 | similarity to hypothetical protein CAD21056.1 - <i>Neurospora crassa</i> -                                        | 1  | 544  | 2  | 2  | 1  | 1  | 2.2  | 0.8  | 0.61 |
| An05g00200 | strong similarity to ankyrin repeat-containing protein Akr1 - <i>Saccharomyces cerevisiae</i>                     | 5  | 731  | 5  | 8  | 19 | 11 | 4.8  | 7.5  | 0.60 |
| An17g00320 | strong similarity to hypothetical membrane protein YDR326c - <i>Saccharomyces cerevisiae</i>                      | 1  | 1252 | 0  | 0  | 4  | 1  | 0.1  | 0.8  | 0.60 |
| An12g04860 | strong similarity to cytoplasmic ribosomal protein of the large subunit L30 - <i>Saccharomyces cerevisiae</i>     | 0  | 106  | 2  | 6  | 4  | 5  | 20.9 | 16.2 | 0.60 |
| An11g09890 | strong similarity to mannosyltransferase 1 PMT1 - <i>Candida albicans</i>                                         | 10 | 944  | 8  | 19 | 13 | 12 | 7.6  | 4.9  | 0.59 |
| An11g05680 | similarity to cytochrome P450 3A13 - <i>Mus musculus</i>                                                          | 1  | 539  | 10 | 6  | 7  | 8  | 8.0  | 5.2  | 0.59 |
| An01g02900 | strong similarity to translation initiation factor Eif-5a.2 - <i>Saccharomyces cerevisiae</i>                     | 0  | 160  | 6  | 0  | 5  | 1  | 10.6 | 7.3  | 0.59 |
| An15g06310 | strong similarity to phosphatidylethanolamine methyltransferase cho2p - <i>Schizosaccharomyces pombe</i>          | 7  | 1077 | 17 | 26 | 25 | 18 | 10.5 | 7.3  | 0.59 |
| An08g00430 | strong similarity to precursor of carboxypeptidase Kex1 - <i>Saccharomyces cerevisiae</i>                         | 1  | 612  | 0  | 0  | 2  | 1  | 0.2  | 1.0  | 0.59 |
| An12g00510 | strong similarity to cytoplasmic ribosomal protein of the small subunit S24.e - <i>Saccharomyces cerevisiae</i>   | 0  | 133  | 6  | 10 | 9  | 10 | 32.3 | 26.4 | 0.58 |
| An02g02980 | strong similarity to protein influencing Itr1 expression Die2 - <i>Saccharomyces cerevisiae</i>                   | 9  | 566  | 2  | 6  | 3  | 3  | 3.9  | 2.1  | 0.57 |
| An13g00540 | strong similarity to hypothetical protein Afu7g04060 - <i>Aspergillus fumigatus</i>                               | 1  | 265  | 0  | 2  | 4  | 2  | 2.5  | 4.4  | 0.57 |
| 208521     | strong similarity to FAD binding domain protein [ <i>Aspergillus clavatus</i> NRRL 1]                             | 1  | 581  | 1  | 3  | 2  | 0  | 2.0  | 0.8  | 0.57 |
| An18g05770 | strong similarity to component of chaperonin-containing T-complex Cct7 - <i>Saccharomyces cerevisiae</i>          | 0  | 631  | 0  | 0  | 1  | 2  | 0.2  | 1.0  | 0.57 |
| An03g02530 | similarity to hypothetical proteinase encoded by SCD8A.14c - <i>Streptomyces coelicolor</i>                       | 0  | 328  | 2  | 3  | 8  | 4  | 4.4  | 6.9  | 0.57 |
| An08g10500 | strong similarity to hypothetical protein EAA62682.1 - <i>Aspergillus nidulans</i>                                | 0  | 268  | 1  | 0  | 1  | 3  | 1.5  | 3.0  | 0.56 |
| An04g06920 | extracellular $\alpha$ -glucosidase agIU - <i>Aspergillus niger</i>                                               | 0  | 985  | 2  | 3  | 13 | 3  | 1.5  | 3.0  | 0.56 |
| An16g02360 | strong similarity to pyridoxine 4-dehydrogenase PLR - <i>Schizosaccharomyces pombe</i> -                          | 0  | 329  | 5  | 1  | 5  | 0  | 5.1  | 3.0  | 0.56 |
| An17g00210 | strong similarity to hypothetical oxidoreductase CAB46711.1 - <i>Schizosaccharomyces pombe</i>                    | 0  | 360  | 4  | 2  | 11 | 3  | 4.7  | 7.3  | 0.55 |
| An12g01350 | strong similarity to cytoplasmic ribosomal protein of the small subunit S4 - <i>Saccharomyces cerevisiae</i>      | 0  | 259  | 15 | 18 | 34 | 23 | 33.7 | 40.0 | 0.55 |
| An12g04500 | strong similarity to transport ATPase Drs2 - <i>Saccharomyces cerevisiae</i>                                      | 7  | 1358 | 0  | 0  | 3  | 2  | 0.1  | 0.7  | 0.55 |
| An01g04570 | strong similarity to capsular associated protein CAP10 - <i>Filobasidiella neoformans</i>                         | 9  | 997  | 0  | 0  | 3  | 1  | 0.1  | 0.8  | 0.55 |
| An03g03900 | similarity to single-stranded DNA-binding protein Rim1 - <i>Saccharomyces cerevisiae</i>                          | 0  | 148  | 2  | 3  | 2  | 3  | 9.7  | 6.7  | 0.54 |

|            |                                                                                                        |    |      |    |    |    |    |      |      |      |
|------------|--------------------------------------------------------------------------------------------------------|----|------|----|----|----|----|------|------|------|
| An15g04150 | strong similarity to oxidoreductase, actinorhodin production encoded by Orf11 - Streptomyces lividans- | 0  | 293  | 2  | 1  | 2  | 0  | 3.1  | 1.5  | 0.54 |
| An08g05670 | strong similarity to nitrate permease crnA - Aspergillus nidulans                                      | 12 | 504  | 0  | 1  | 1  | 4  | 0.8  | 2.0  | 0.54 |
| An15g05290 | strong similarity to bile acid transporter Ybt1 - Saccharomyces cerevisiae                             | 14 | 1542 | 6  | 18 | 28 | 27 | 4.1  | 6.5  | 0.53 |
| An15g07040 | strong similarity to phospholipase D Spo14 - Saccharomyces cerevisiae                                  | 0  | 1214 | 2  | 10 | 7  | 1  | 2.7  | 1.3  | 0.52 |
| An04g07060 | strong similarity to peptide ABC transporter protein Mdl1 - Saccharomyces cerevisiae                   | 5  | 787  | 0  | 1  | 1  | 5  | 0.5  | 1.5  | 0.52 |
| An17g02240 | strong similarity to cytoplasmic ribosomal protein of the large subunit L23a - Rattus norvegicus       | 0  | 154  | 3  | 2  | 4  | 1  | 9.3  | 6.4  | 0.52 |
| An11g04730 | prolyl aminopeptidase papA - Aspergillus niger                                                         | 0  | 511  | 3  | 2  | 8  | 5  | 2.8  | 4.8  | 0.52 |
| An08g05640 | strong similarity to nitrite reductase (NADH) niiA - Aspergillus nidulans                              | 0  | 1097 | 31 | 25 | 36 | 24 | 13.4 | 9.9  | 0.51 |
| An04g00410 | strong similarity to dipeptidyl peptidase III - Rattus norvegicus-                                     | 0  | 707  | 7  | 13 | 41 | 0  | 7.5  | 10.6 | 0.51 |
| An01g02810 | strong similarity to cytochrome P450 sterol $\delta$ 22-desaturase Erg5 - Saccharomyces cerevisiae     | 0  | 531  | 1  | 0  | 3  | 2  | 0.7  | 1.9  | 0.51 |
| An13g00620 | strong similarity to 80K protein H precursor G19P1 - Homo sapiens                                      | 0  | 568  | 11 | 25 | 20 | 20 | 16.7 | 12.9 | 0.51 |
| An08g07420 | strong similarity to multifunctional pyrimidine biosynthesis enzyme pyrABCN - Aspergillus nidulans     | 0  | 2277 | 10 | 4  | 30 | 10 | 1.7  | 3.2  | 0.50 |
| An09g06800 | strong similarity to leucyl aminopeptidase Ape2 - Saccharomyces cerevisiae-                            | 0  | 882  | 4  | 9  | 30 | 0  | 4.0  | 6.2  | 0.50 |
| An04g07080 | similarity to hypothetical protein SPBC2G5.01 - Schizosaccharomyces pombe                              | 1  | 433  | 6  | 13 | 3  | 17 | 11.7 | 8.5  | 0.50 |
| An07g01970 | strong similarity to cytoplasmic metalloproteinase mepB - Aspergillus fumigatus-                       | 0  | 716  | 1  | 5  | 16 | 0  | 2.4  | 4.2  | 0.50 |
| An04g04940 | strong similarity to hypothetical protein Afu4g11550 - Aspergillus fumigatus                           | 4  | 303  | 2  | 5  | 6  | 9  | 6.4  | 9.2  | 0.50 |
| An11g06860 | strong similarity to multidrug transporter bmr3 - Bacillus subtilis                                    | 12 | 550  | 1  | 0  | 3  | 2  | 0.7  | 1.8  | 0.49 |
| An05g02280 | similarity to esterase from patent WO9802556-A2 - Alcaligenes sp.                                      | 0  | 375  | 1  | 5  | 1  | 4  | 4.5  | 2.6  | 0.49 |
| An08g07360 | strong similarity to mitochondrial import receptor TOM20 - Neurospora crassa                           | 1  | 167  | 4  | 9  | 4  | 11 | 21.0 | 16.7 | 0.49 |
| 53656      | strong similarity to Pc24g00650 [Penicillium chrysogenum Wisconsin 54-1255]                            | 0  | 134  | 3  | 1  | 4  | 0  | 8.7  | 6.1  | 0.49 |
| An12g00410 | strong similarity to RNA binding protein 47 RBP47 - Nicotiana glauca                                   | 0  | 402  | 1  | 6  | 4  | 2  | 4.9  | 2.9  | 0.49 |
| An02g02020 | strong similarity to vacuolar H(+)-transporting ATPase subunit B Vma2 - Saccharomyces cerevisiae       | 0  | 507  | 19 | 14 | 18 | 19 | 17.2 | 13.3 | 0.49 |
| An12g08610 | glucokinase glkA - Aspergillus niger-                                                                  | 0  | 495  | 6  | 10 | 16 | 0  | 8.7  | 6.0  | 0.49 |
| An15g03940 | strong similarity to monosaccharide transporter AmMst-1 - Amanita muscaria                             | 10 | 527  | 2  | 2  | 6  | 5  | 2.2  | 3.9  | 0.48 |
| An07g09190 | strong similarity to very long-chain fatty acyl-CoA synthase Fat1 - Saccharomyces cerevisiae           | 3  | 655  | 1  | 5  | 1  | 3  | 2.6  | 1.2  | 0.48 |
| An07g10350 | protein O-mannosyl transferase pmtA - Aspergillus niger                                                | 9  | 741  | 8  | 18 | 26 | 25 | 9.3  | 12.5 | 0.48 |
| An08g03690 | strong similarity to ADP-ribosylation factor arf1 - Ajellomyces capsulatus                             | 0  | 183  | 2  | 1  | 5  | 2  | 5.0  | 7.4  | 0.47 |
| An02g14210 | strong similarity to hypothetical agmanitase - Escherichia coli                                        | 0  | 422  | 3  | 3  | 9  | 5  | 4.0  | 6.2  | 0.47 |
| An05g01070 | strong similarity to 7-aminocholesterol resistance protein Rta1 - Saccharomyces cerevisiae             | 7  | 320  | 0  | 1  | 3  | 1  | 1.2  | 2.5  | 0.47 |
| An01g03350 | strong similarity to C-8 sterol isomerase erg-1 - Neurospora crassa                                    | 1  | 215  | 6  | 12 | 7  | 14 | 22.4 | 18.0 | 0.47 |
| An14g02280 | strong similarity to hypothetical protein Afu4g03090 - Aspergillus fumigatus                           | 1  | 342  | 0  | 3  | 5  | 3  | 2.7  | 4.5  | 0.47 |
| An04g08820 | strong similarity to glucosyltransferase Alg8 - Saccharomyces cerevisiae                               | 10 | 580  | 0  | 1  | 4  | 1  | 0.7  | 1.7  | 0.47 |
| An11g10260 | strong similarity to $\alpha$ N-acetylglucosamine transferase - Kluyveromyces lactis                   | 1  | 345  | 2  | 1  | 6  | 2  | 2.6  | 4.4  | 0.46 |
| An16g08470 | similarity to hypothetical cell growth regulator OS-9 - Homo sapiens                                   | 0  | 509  | 4  | 6  | 6  | 3  | 5.4  | 3.4  | 0.46 |
| An03g05000 | similarity to human transmembrane protein HTPN-73 from patent WO9961471-A2 - Homo sapiens              | 7  | 457  | 3  | 5  | 3  | 4  | 4.8  | 3.0  | 0.46 |
| An08g10710 | strong similarity to proteasome 19S regulatory particle subunit Rpn9 - Saccharomyces cerevisiae        | 0  | 381  | 3  | 2  | 2  | 2  | 3.8  | 2.1  | 0.46 |
| An03g03650 | strong similarity to hypothetical protein Afu3g04020 - Aspergillus fumigatus                           | 0  | 332  | 0  | 1  | 3  | 1  | 1.2  | 2.4  | 0.45 |
| An08g02770 | strong similarity to vacuolar H(+)-ATPase activator subunit Vma13 - Saccharomyces cerevisiae           | 0  | 478  | 11 | 8  | 7  | 13 | 10.6 | 7.7  | 0.45 |
| An01g04250 | strong similarity to uroporphyrinogen decarboxylase from patent WO9925839-A1 - Thielavia terrestris-   | 0  | 363  | 1  | 3  | 3  | 0  | 3.2  | 1.7  | 0.45 |
| An04g04990 | strong similarity to mannose-1-phosphate guanyltransferase MPG1 - Trichoderma reesei-                  | 0  | 364  | 3  | 1  | 1  | 2  | 3.2  | 1.7  | 0.45 |

|            |                                                                                                               |   |      |    |    |    |    |      |      |      |
|------------|---------------------------------------------------------------------------------------------------------------|---|------|----|----|----|----|------|------|------|
| An12g03990 | strong similarity to hypothetical protein EAA57923.1 - <i>Aspergillus nidulans</i>                            | 0 | 769  | 5  | 23 | 11 | 18 | 9.6  | 6.9  | 0.45 |
| An01g12570 | strong similarity to histidinol dehydrogenase his-3 - <i>Neurospora crassa</i>                                | 0 | 866  | 5  | 4  | 21 | 1  | 2.9  | 4.7  | 0.45 |
| An06g00710 | similarity to $\beta$ -lactamase from patent FR2792651-A1 - <i>Pyrococcus abyssi</i>                          | 0 | 1084 | 4  | 3  | 2  | 2  | 1.8  | 0.7  | 0.45 |
| An18g02480 | strong similarity to DNA repair protein XAB2 - <i>Homo sapiens</i> -                                          | 0 | 822  | 1  | 2  | 0  | 1  | 1.1  | 0.3  | 0.45 |
| An04g05630 | similarity to nuclear pore complex subunit Nup100 - <i>Saccharomyces cerevisiae</i> -                         | 0 | 1949 | 3  | 2  | 0  | 1  | 0.7  | 0.1  | 0.45 |
| An08g06400 | strong similarity to actin-related protein arp2p - <i>Schizosaccharomyces pombe</i> [truncated ORF]           | 0 | 341  | 1  | 0  | 2  | 2  | 1.1  | 2.4  | 0.44 |
| An15g01350 | strong similarity to hypothetical cleft lip and palate transmembrane protein 1 CLPTM1 - <i>Homo sapiens</i>   | 5 | 601  | 4  | 8  | 7  | 4  | 5.4  | 3.5  | 0.44 |
| An12g00720 | strong similarity to 138 kD subunit of DNA-dependent RNA polymerase II rpb2p - <i>S. pombe</i>                | 0 | 1256 | 0  | 0  | 3  | 1  | 0.1  | 0.6  | 0.44 |
| An07g04850 | An02g01510                                                                                                    | 0 | 346  | 1  | 0  | 3  | 1  | 1.1  | 2.3  | 0.44 |
| An12g04870 | strong similarity to cytoplasmic ribosomal protein of the large subunit L10 - <i>Saccharomyces cerevisiae</i> | 0 | 223  | 27 | 18 | 26 | 31 | 53.1 | 46.5 | 0.44 |
| An08g05610 | nitrate reductase (NADPH) niaD - <i>Aspergillus niger</i> -                                                   | 0 | 867  | 6  | 2  | 20 | 0  | 2.6  | 4.3  | 0.44 |
| An07g10420 | strong similarity to cell division cycle protein Cdc50 - <i>Saccharomyces cerevisiae</i>                      | 2 | 402  | 1  | 3  | 7  | 3  | 2.9  | 4.7  | 0.43 |
| An15g00170 | strong similarity to protein kinase skp1p - <i>Schizosaccharomyces pombe</i>                                  | 0 | 394  | 6  | 5  | 6  | 5  | 7.6  | 5.3  | 0.42 |
| An16g08550 | strong similarity to ATP synthase coupling factor (F0) subunit e Tim11 - <i>Saccharomyces cerevisiae</i>      | 1 | 92   | 2  | 4  | 4  | 7  | 18.4 | 22.5 | 0.42 |
| An17g00910 | strong similarity to 4-aminobutyrate transaminase gatA - <i>Aspergillus nidulans</i>                          | 0 | 498  | 0  | 8  | 1  | 6  | 4.4  | 2.7  | 0.42 |
| An08g02310 | similarity to HC-toxin non-ribosomal peptide synthase HTS1 - <i>Cochliobolus carbonum</i>                     | 0 | 6242 | 25 | 15 | 10 | 14 | 1.7  | 0.7  | 0.41 |
| An11g09670 | strong similarity to cytoplasmic ribosomal protein of the small subunit S27 - <i>Homo sapiens</i>             | 0 | 82   | 1  | 2  | 4  | 2  | 11.1 | 14.3 | 0.40 |
| An02g01830 | cytochrome c cyc - <i>Aspergillus niger</i>                                                                   | 0 | 112  | 5  | 8  | 4  | 12 | 31.4 | 26.6 | 0.40 |
| An09g05290 | strong similarity to exonuclease II SPAC17A5.14 - <i>Schizosaccharomyces pombe</i>                            | 0 | 1406 | 2  | 7  | 19 | 5  | 1.8  | 3.1  | 0.40 |
| An15g06390 | strong similarity to ribosomal RNA processing protein Rrp5 - <i>Saccharomyces cerevisiae</i>                  | 0 | 1822 | 3  | 0  | 12 | 1  | 0.5  | 1.3  | 0.40 |
| An08g05730 | strong similarity to cytoplasmic ribosomal protein of the large subunit L1 - <i>Saccharomyces cerevisiae</i>  | 0 | 300  | 3  | 2  | 10 | 1  | 4.8  | 6.9  | 0.40 |
| An18g06440 | strong similarity to COPII vesicle component Yip3 - <i>Saccharomyces cerevisiae</i>                           | 3 | 173  | 5  | 3  | 10 | 5  | 12.8 | 16.2 | 0.39 |
| An07g03200 | strong similarity to adaptor complex AP-1 medium chain AP47 - <i>Mus musculus</i>                             | 0 | 418  | 3  | 1  | 2  | 1  | 2.8  | 1.5  | 0.39 |
| An02g07120 | strong similarity to viral integration site protein int-6/EIF-3 P48 - <i>Mus musculus</i>                     | 0 | 452  | 12 | 19 | 18 | 18 | 18.1 | 14.6 | 0.39 |
| 181397     | strong similarity to fatty-acyl coenzyme A oxidase (Pox1), putative [ <i>Aspergillus fumigatus</i> A1163]     | 0 | 694  | 1  | 0  | 4  | 1  | 0.6  | 1.4  | 0.39 |
| An02g14560 | oligosaccharyltransferase $\alpha$ subunit ostA - <i>Aspergillus niger</i>                                    | 1 | 503  | 23 | 56 | 46 | 53 | 41.1 | 35.7 | 0.39 |
| An16g04640 | strong similarity to hypothetical protein SPCC1281.03c - <i>Schizosaccharomyces pombe</i>                     | 2 | 186  | 0  | 2  | 4  | 1  | 3.5  | 5.3  | 0.38 |
| An15g01890 | strong similarity to $\beta$ -glucosidase precursor bgl2 - <i>Coccidioides immitis</i>                        | 0 | 936  | 0  | 0  | 2  | 1  | 0.1  | 0.7  | 0.38 |
| An02g03860 | strong similarity to hypothetical protein B1D1.160 - <i>Neurospora crassa</i> -                               | 0 | 1265 | 6  | 6  | 9  | 0  | 2.6  | 1.4  | 0.38 |
| An01g02600 | strong similarity to $\gamma$ 1-adaptin - <i>Homo sapiens</i>                                                 | 0 | 848  | 4  | 4  | 4  | 2  | 2.6  | 1.4  | 0.38 |
| An02g03520 | strong similarity to G protein-binding protein CRFG - <i>Homo sapiens</i>                                     | 0 | 655  | 3  | 0  | 4  | 5  | 1.4  | 2.6  | 0.38 |
| An02g03570 | strong similarity to membrane protein YBR159w - <i>Saccharomyces cerevisiae</i>                               | 3 | 346  | 8  | 19 | 19 | 13 | 20.7 | 16.9 | 0.37 |
| An04g01830 | similarity to hypothetical DEC1 protein homolog - <i>Schizosaccharomyces pombe</i>                            | 0 | 937  | 2  | 2  | 9  | 3  | 1.2  | 2.4  | 0.37 |
| An02g02410 | similarity to high density lipoprotein-binding protein HBP - <i>Homo sapiens</i>                              | 0 | 976  | 0  | 0  | 2  | 1  | 0.1  | 0.6  | 0.37 |
| An16g07390 | strong similarity to endoplasmic reticulum signal peptidase subunit Spc2 - <i>Saccharomyces cerevisiae</i>    | 2 | 209  | 2  | 7  | 4  | 6  | 11.8 | 9.1  | 0.37 |
| An01g09260 | strong similarity to aldehyde dehydrogenase (NADP+) - <i>Homo sapiens</i>                                     | 0 | 500  | 3  | 6  | 11 | 8  | 4.9  | 7.0  | 0.37 |
| An09g06580 | strong similarity to ras-GTPase-activating protein SH3-domain binding protein G3BP - <i>Mus musculus</i>      | 0 | 537  | 5  | 2  | 4  | 2  | 3.6  | 2.2  | 0.37 |
| An08g03190 | strong similarity to tubulin $\beta$ chain $\beta$ -tubulin - <i>Aspergillus flavus</i>                       | 0 | 447  | 28 | 30 | 29 | 43 | 34.1 | 29.3 | 0.36 |
| An07g05160 | similarity to hypothetical protein C01B10.8 - <i>Caenorhabditis elegans</i>                                   | 5 | 542  | 2  | 5  | 3  | 3  | 3.6  | 2.2  | 0.36 |
| An04g01780 | strong similarity to hypothetical protein YAR002c-a - <i>Saccharomyces cerevisiae</i>                         | 1 | 232  | 3  | 6  | 9  | 8  | 10.7 | 13.6 | 0.36 |



|            |                                                                                                                                                |    |      |    |    |    |    |      |      |      |
|------------|------------------------------------------------------------------------------------------------------------------------------------------------|----|------|----|----|----|----|------|------|------|
| An07g07880 | similarity to ORFX ORF2689 polypeptide sequence SEQ ID NO:5378 from patent WO200058473-A2 - Homo sapiens                                       | 0  | 517  | 0  | 5  | 7  | 5  | 2.8  | 4.4  | 0.36 |
| An16g04160 | strong similarity to galactokinase Gal1 - Saccharomyces cerevisiae-                                                                            | 0  | 524  | 3  | 3  | 5  | 0  | 3.2  | 1.9  | 0.35 |
| An16g02820 | strong similarity to fatty acid omega-hydroxylase CYP505 - Fusarium oxysporum                                                                  | 0  | 1104 | 6  | 8  | 5  | 7  | 3.4  | 2.0  | 0.35 |
| An12g00800 | strong similarity to C2-domain family vesicle protein GLUT4 - Rattus norvegicus                                                                | 1  | 1520 | 19 | 21 | 58 | 20 | 6.9  | 9.3  | 0.35 |
| An11g02620 | strong similarity to alanine transaminase ALA2 - Hordeum vulgare-                                                                              | 0  | 567  | 2  | 5  | 6  | 0  | 3.4  | 2.1  | 0.35 |
| An11g10320 | strong similarity to cytoskeleton assembly control protein homolog Sla2 - Saccharomyces cerevisiae                                             | 0  | 1015 | 3  | 1  | 10 | 2  | 1.2  | 2.2  | 0.34 |
| An03g01280 | strong similarity to glutamine--tRNA ligase - Saccharomyces cerevisiae                                                                         | 0  | 625  | 3  | 4  | 12 | 4  | 3.1  | 4.8  | 0.34 |
| An04g09890 | strong similarity to hypothetical cell wall $\alpha$ -glucan synthase ags1p - Schizosaccharomyces pombe                                        | 13 | 2397 | 0  | 4  | 8  | 8  | 0.5  | 1.2  | 0.34 |
| An04g00670 | strong similarity to hypothetical coiled-coil protein similar to human congenital heart disease protein CAC05252.1 - Schizosaccharomyces pombe | 1  | 196  | 1  | 3  | 2  | 2  | 6.0  | 4.1  | 0.33 |
| An01g05650 | strong similarity to tubulin $\alpha$ -1 chain tubA - Aspergillus nidulans                                                                     | 0  | 448  | 19 | 13 | 23 | 15 | 18.9 | 15.5 | 0.33 |
| An17g00540 | similarity to suppressor of S.cerevisiae sin4 mutation Rlr1 - Saccharomyces cerevisiae                                                         | 0  | 2274 | 0  | 0  | 3  | 2  | 0.1  | 0.4  | 0.33 |
| An08g03960 | strong similarity to hypothetical endoplasmic reticulum associated protein - Schizosaccharomyces pombe                                         | 7  | 254  | 4  | 5  | 10 | 7  | 9.7  | 12.4 | 0.33 |
| An07g05820 | strong similarity to hypothetical transmembrane protein usgS - Aspergillus nidulans                                                            | 4  | 366  | 4  | 10 | 13 | 13 | 10.3 | 13.1 | 0.32 |
| An07g06840 | strong similarity to precursor of dihydrolipoamide dehydrogenase Lpd1 - Saccharomyces cerevisiae                                               | 0  | 514  | 26 | 41 | 57 | 27 | 34.2 | 29.7 | 0.32 |
| An16g08830 | strong similarity to component of ER protein-translocation subcomplex Sec71 from patent WO9949028-A1 - Saccharomyces cerevisiae                | 1  | 270  | 5  | 15 | 11 | 13 | 19.8 | 16.4 | 0.32 |
| An08g06770 | strong similarity to cytoplasmic isoleucine--tRNA ligase IIs1 - Saccharomyces cerevisiae-                                                      | 0  | 1077 | 8  | 3  | 25 | 0  | 2.8  | 4.3  | 0.32 |
| An15g00690 | strong similarity to 14.8 kD subunit of NADH:ubiquinone reductase - Neurospora crassa                                                          | 0  | 123  | 0  | 6  | 3  | 8  | 13.8 | 16.9 | 0.32 |
| An02g14450 | secretory pathway Ca <sup>2+</sup> -ATPase pmrA - Aspergillus niger                                                                            | 6  | 1028 | 2  | 6  | 3  | 3  | 2.2  | 1.1  | 0.32 |
| An03g01320 | strong similarity to hypothetical protein mlr2056 - Mesorhizobium loti                                                                         | 1  | 256  | 2  | 4  | 9  | 3  | 6.6  | 8.8  | 0.32 |
| An16g02560 | strong similarity to hypothetical $\beta$ -lactamase XF1621 - Xylella fastidiosa-                                                              | 0  | 506  | 1  | 2  | 1  | 1  | 1.8  | 0.9  | 0.31 |
| An02g07690 | strong similarity to chromosome segregation protein mal3p - Schizosaccharomyces pombe                                                          | 0  | 246  | 6  | 3  | 6  | 4  | 10.1 | 7.7  | 0.31 |
| An18g04030 | similarity to Topoisomerase I TopoI - Filobasidiella neoformans-                                                                               | 0  | 514  | 1  | 2  | 2  | 0  | 1.8  | 0.9  | 0.31 |
| An02g12750 | strong similarity to cytoskeleton specific chaperonin subunit Cct4 - Saccharomyces cerevisiae                                                  | 0  | 536  | 2  | 2  | 1  | 2  | 2.2  | 1.2  | 0.31 |
| An11g05000 | strong similarity to Niemann-Pick C1 protein - Homo sapiens                                                                                    | 14 | 1277 | 1  | 8  | 12 | 10 | 1.9  | 3.2  | 0.30 |
| An04g03400 | strong similarity to aldehyde dehydrogenase aldA - Aspergillus niger                                                                           | 0  | 502  | 6  | 4  | 7  | 3  | 5.4  | 3.8  | 0.30 |
| An12g01020 | strong similarity to acetamidase amdS - Aspergillus nidulans                                                                                   | 0  | 579  | 6  | 17 | 19 | 23 | 10.6 | 13.2 | 0.30 |
| An02g08660 | strong similarity to hypothetical protein H04M03.4 - Caenorhabditis elegans                                                                    | 0  | 510  | 17 | 12 | 28 | 6  | 15.1 | 12.2 | 0.30 |
| An02g11200 | similarity to 13 kD subunit of NADH:ubiquinone reductase - Bos taurus                                                                          | 0  | 292  | 0  | 3  | 1  | 6  | 3.1  | 4.6  | 0.30 |
| An03g00730 | strong similarity to copper amine oxidase AO-I from patent JP08070872-A - Aspergillus niger-                                                   | 0  | 668  | 2  | 5  | 6  | 0  | 2.9  | 1.8  | 0.29 |
| An12g03980 | strong similarity to hypothetical protein AAN52526.1 - Pichia angusta                                                                          | 2  | 176  | 1  | 2  | 1  | 2  | 5.2  | 3.6  | 0.29 |
| An08g07290 | aldehyde dehydrogenase aldA - Aspergillus niger                                                                                                | 0  | 497  | 19 | 14 | 42 | 15 | 17.5 | 20.9 | 0.29 |
| An14g01030 | strong similarity to translation initiation factor eIF-3 subunit - Homo sapiens [truncated ORF]                                                | 0  | 505  | 11 | 15 | 29 | 17 | 13.7 | 16.6 | 0.29 |
| An09g06650 | strong similarity to core protein II of ubiquinol--cytochrome c reductase CAA42214.1 - Bos primigenius taurus                                  | 0  | 458  | 32 | 48 | 61 | 42 | 45.7 | 40.8 | 0.29 |
| An12g02080 | strong similarity to cytochrome P450 monooxygenase stcS - Aspergillus nidulans [putative frameshift]                                           | 0  | 510  | 3  | 10 | 9  | 16 | 6.9  | 9.0  | 0.29 |
| An02g05870 | strong similarity to coatomer $\beta$ subunit copB2 - Homo sapiens [putative frameshift]                                                       | 0  | 873  | 6  | 7  | 24 | 3  | 4.0  | 5.7  | 0.28 |
| An02g01690 | strong similarity to p150 component of the COPII coat of secretory pathway vesicles Sec31 - S. cerevisiae                                      | 0  | 1259 | 2  | 1  | 7  | 3  | 0.7  | 1.5  | 0.28 |
| An01g14730 | similarity to cis cis-muconate lactonizing enzyme I TcMLE - Trichosporon cutaneum                                                              | 0  | 391  | 2  | 5  | 5  | 2  | 5.0  | 3.5  | 0.28 |

|            |                                                                                                                            |    |      |    |    |     |    |      |      |      |
|------------|----------------------------------------------------------------------------------------------------------------------------|----|------|----|----|-----|----|------|------|------|
| An11g02040 | strong similarity to phosphogluconate dehydrogenase Gnd1 - <i>Saccharomyces cerevisiae</i>                                 | 0  | 508  | 62 | 52 | 103 | 46 | 58.7 | 53.1 | 0.28 |
| An14g03050 | strong similarity to hypothetical protein of the UPF0028 family - <i>Schizosaccharomyces pombe</i>                         | 2  | 1482 | 1  | 0  | 4   | 2  | 0.3  | 0.8  | 0.28 |
| An02g03010 | strong similarity to chromosome segregation protein cut14p - <i>Schizosaccharomyces pombe</i>                              | 0  | 1179 | 2  | 6  | 3   | 3  | 1.9  | 1.0  | 0.28 |
| An17g01330 | strong similarity to adenosine kinase - <i>Cricetulus griseus</i>                                                          | 0  | 353  | 3  | 4  | 13  | 1  | 5.5  | 7.4  | 0.27 |
| An11g00010 | similarity to antiviral GTPase Mx1 - <i>Oncorhynchus mykiss</i>                                                            | 0  | 802  | 2  | 17 | 8   | 12 | 6.3  | 4.6  | 0.27 |
| An07g10400 | strong similarity to cell division control protein Cdc68 - <i>Saccharomyces cerevisiae</i>                                 | 0  | 1020 | 0  | 1  | 4   | 1  | 0.4  | 1.0  | 0.27 |
| An07g02770 | strong similarity to hypothetical protein YKL195w - <i>Saccharomyces cerevisiae</i>                                        | 0  | 270  | 0  | 2  | 2   | 3  | 2.4  | 3.7  | 0.26 |
| An01g06040 | strong similarity to hypothetical membrane protein YOL077c - <i>Saccharomyces cerevisiae</i>                               | 0  | 358  | 3  | 3  | 5   | 1  | 4.7  | 3.3  | 0.26 |
| An02g09290 | hypothetical protein-                                                                                                      | 0  | 608  | 1  | 2  | 1   | 1  | 1.5  | 0.7  | 0.26 |
| An18g02990 | similarity to mitochondrial ribosomal protein Mrp20 - <i>Saccharomyces cerevisiae</i> -                                    | 0  | 196  | 1  | 2  | 1   | 2  | 4.6  | 3.2  | 0.26 |
| An08g00880 | strong similarity to hypothetical branched-chain $\alpha$ -ketoacid dehydrogenase E1 $\beta$ subunit - <i>Homo sapiens</i> | 0  | 375  | 8  | 13 | 9   | 16 | 14.9 | 12.3 | 0.26 |
| An07g07340 | strong similarity to luminal ER-protein retention receptor ERD2 - <i>Kluyveromyces marxianus</i>                           | 6  | 335  | 2  | 1  | 6   | 1  | 2.7  | 4.0  | 0.26 |
| An14g02360 | strong similarity to U2 snRNA-specific protein A - <i>Homo sapiens</i>                                                     | 0  | 253  | 3  | 1  | 2   | 2  | 4.6  | 3.2  | 0.26 |
| An04g01940 | strong similarity to translation initiation factor eIF2 $\gamma$ chain Gcd11 - <i>Saccharomyces cerevisiae</i>             | 0  | 513  | 9  | 4  | 9   | 5  | 6.8  | 5.1  | 0.26 |
| An12g08560 | strong similarity to proteinase SlpE - <i>Streptomyces lividans</i>                                                        | 2  | 624  | 0  | 3  | 7   | 1  | 1.5  | 2.5  | 0.26 |
| An15g06020 | strong similarity to ubiquitin activating protein Uba1 - <i>Saccharomyces cerevisiae</i> -                                 | 0  | 1034 | 6  | 8  | 29  | 0  | 3.6  | 5.1  | 0.26 |
| An04g01230 | strong similarity to hypothetical ECM33 homolog SPCC1223.12c - <i>Schizosaccharomyces pombe</i>                            | 0  | 401  | 1  | 3  | 5   | 4  | 2.9  | 4.3  | 0.26 |
| An08g03490 | similarity to elongation factor 1 $\beta$ EF-1 - <i>Oryctolagus cuniculus</i>                                              | 0  | 302  | 6  | 3  | 7   | 3  | 8.2  | 6.3  | 0.25 |
| An03g04060 | strong similarity to cadmium resistance protein Ycf1 - <i>Saccharomyces cerevisiae</i>                                     | 12 | 1541 | 5  | 23 | 32  | 23 | 4.8  | 6.5  | 0.25 |
| An02g07500 | strong similarity to saccharopine dehydrogenase LYS1 - <i>Candida albicans</i> -                                           | 0  | 377  | 3  | 3  | 6   | 0  | 4.5  | 3.1  | 0.25 |
| An13g00090 | strong similarity to eburicol 14 $\alpha$ -demethylase cyp51 - <i>Uncinula necator</i>                                     | 2  | 556  | 5  | 13 | 19  | 14 | 8.7  | 10.9 | 0.25 |
| An12g08760 | strong similarity to vacuolar ATPase subunit E Vma-4 - <i>Neurospora crassa</i>                                            | 0  | 231  | 4  | 7  | 6   | 7  | 13.0 | 10.5 | 0.25 |
| An11g11310 | strong similarity to histone H2B - <i>Aspergillus nidulans</i>                                                             | 0  | 141  | 4  | 5  | 8   | 3  | 17.5 | 14.7 | 0.25 |
| An05g00070 | strong similarity to leukotriene-A4 hydrolase - <i>Mus musculus</i> -                                                      | 0  | 664  | 1  | 3  | 3   | 0  | 1.8  | 1.0  | 0.25 |
| An17g02170 | strong similarity to centromere/microtubule-binding protein Cbf5 - <i>Saccharomyces cerevisiae</i>                         | 0  | 485  | 4  | 1  | 8   | 3  | 3.0  | 4.3  | 0.24 |
| An08g00310 | strong similarity to septin aspD - <i>Aspergillus nidulans</i>                                                             | 0  | 346  | 5  | 4  | 16  | 1  | 7.1  | 9.1  | 0.24 |
| An13g00080 | strong similarity to hypothetical conserved protein B2F7.100 - <i>Neurospora crassa</i>                                    | 0  | 238  | 1  | 0  | 2   | 1  | 1.6  | 2.7  | 0.24 |
| An14g04180 | strong similarity to H <sup>+</sup> -transporting ATP synthase $\beta$ chain - <i>Neurospora crassa</i> [truncated ORF]    | 0  | 417  | 71 | 70 | 134 | 85 | 88.3 | 95.0 | 0.24 |
| An15g02340 | strong similarity to argininosuccinate synthase Arg1 - <i>Saccharomyces cerevisiae</i>                                     | 0  | 417  | 6  | 4  | 17  | 2  | 6.6  | 8.4  | 0.24 |
| An02g12120 | strong similarity to cytoplasmic ribosomal protein of the large subunit Rpl37b - <i>Saccharomyces cerevisiae</i>           | 0  | 109  | 3  | 2  | 4   | 2  | 13.1 | 10.8 | 0.24 |
| An16g07120 | strong similarity to regulator protein Sin3 - <i>Saccharomyces cerevisiae</i>                                              | 0  | 1531 | 0  | 0  | 2   | 1  | 0.1  | 0.4  | 0.23 |
| An01g12380 | strong similarity to ATP-binding cassette transporter PMR1 - <i>Penicillium digitatum</i>                                  | 13 | 1539 | 0  | 0  | 1   | 2  | 0.1  | 0.4  | 0.23 |
| An07g04190 | strong similarity to dolichyl-diphosphooligosaccharide-protein glycosyltransferase DDOST - <i>Gallus gallus</i>            | 1  | 458  | 30 | 44 | 41  | 55 | 42.3 | 38.0 | 0.23 |
| An01g09220 | weak similarity to tyrosinase melC2 - <i>Streptomyces lincolnensis</i> -                                                   | 0  | 406  | 2  | 4  | 6   | 0  | 4.2  | 2.9  | 0.23 |
| An03g04560 | strong similarity to morphine dehydrogenase - <i>Pseudomonas putida</i> -                                                  | 0  | 283  | 3  | 1  | 4   | 0  | 4.1  | 2.9  | 0.23 |
| An03g03660 | strong similarity to glutathione reductase Glr1 - <i>Saccharomyces cerevisiae</i> -                                        | 0  | 472  | 2  | 5  | 7   | 0  | 4.1  | 2.9  | 0.23 |
| An18g03100 | strong similarity to hypothetical precursor of secretory protein Ssp120 - <i>Saccharomyces cerevisiae</i>                  | 0  | 199  | 6  | 4  | 7   | 5  | 13.7 | 11.3 | 0.23 |
| An02g10310 | strong similarity to glycogen synthase - <i>Neurospora crassa</i>                                                          | 0  | 713  | 3  | 1  | 1   | 2  | 1.6  | 0.9  | 0.23 |
| An01g04280 | strong similarity to dnaJ protein homolog Ydj1 - <i>Saccharomyces cerevisiae</i>                                           | 0  | 413  | 5  | 1  | 3   | 3  | 4.1  | 2.8  | 0.23 |
| An16g07470 | similarity to mediator of 40S ribosomal subunit assembly gar2p - <i>Schizosaccharomyces pombe</i>                          | 0  | 381  | 3  | 0  | 5   | 2  | 2.4  | 3.6  | 0.23 |

|            |                                                                                                                  |   |      |    |    |    |    |      |      |      |
|------------|------------------------------------------------------------------------------------------------------------------|---|------|----|----|----|----|------|------|------|
| An09g04170 | strong similarity to protein Sly1 - <i>Saccharomyces cerevisiae</i>                                              | 0 | 705  | 3  | 0  | 6  | 2  | 1.3  | 2.2  | 0.23 |
| An01g09520 | strong similarity to mitogen-activated protein kinase mPKA - <i>Aspergillus nidulans</i>                         | 0 | 421  | 5  | 1  | 2  | 4  | 4.0  | 2.8  | 0.22 |
| An08g06090 | similarity to nucleoporin nup184p - <i>Schizosaccharomyces pombe</i>                                             | 0 | 1832 | 1  | 0  | 2  | 4  | 0.2  | 0.6  | 0.22 |
| An07g08170 | strong similarity to IMP dehydrogenase IMH3 - <i>Candida albicans</i>                                            | 0 | 533  | 16 | 8  | 21 | 21 | 12.0 | 14.4 | 0.22 |
| An02g07210 | aspartic protease pepE - <i>Aspergillus niger</i>                                                                | 0 | 398  | 8  | 12 | 16 | 8  | 13.4 | 11.1 | 0.22 |
| An08g05500 | strong similarity to mitochondrial ribosomal protein of the large subunit Yml3 - <i>Saccharomyces cerevisiae</i> | 0 | 371  | 4  | 1  | 1  | 4  | 3.9  | 2.7  | 0.22 |
| An07g06990 | strong similarity to hypothetical protein SPCC594.04c - <i>Schizosaccharomyces pombe</i>                         | 2 | 373  | 1  | 4  | 1  | 4  | 3.8  | 2.7  | 0.21 |
| An08g04470 | strong similarity to mitochondrial elongation factor Tu - <i>Arabidopsis thaliana</i>                            | 0 | 440  | 4  | 10 | 3  | 13 | 8.6  | 6.8  | 0.21 |
| An12g00820 | strong similarity to UTP-glucose-1-phosphate uridylyltransferase Ugp1 - <i>Saccharomyces cerevisiae</i>          | 0 | 521  | 34 | 12 | 50 | 26 | 23.2 | 26.5 | 0.21 |
| An18g02760 | similarity to hypothetical protein T21J18.40 - <i>Arabidopsis thaliana</i>                                       | 0 | 1689 | 0  | 0  | 1  | 2  | 0.1  | 0.4  | 0.21 |
| An03g01090 | similarity to $\alpha$ -1,6-mannosyltransferase Hoc1 - <i>Saccharomyces cerevisiae</i>                           | 0 | 413  | 2  | 1  | 6  | 1  | 2.2  | 3.3  | 0.21 |
| An18g00730 | strong similarity to capsule-associated protein CAP59 - <i>Cryptococcus neoformans</i>                           | 1 | 430  | 3  | 7  | 7  | 4  | 6.4  | 4.8  | 0.21 |
| An01g04320 | strong similarity to COPII vesicle coat component protein Erv46 - <i>Saccharomyces cerevisiae</i>                | 2 | 406  | 8  | 11 | 24 | 9  | 12.5 | 14.9 | 0.21 |
| An04g06200 | strong similarity to dihydrosphingosine/sphingosine phosphate lyase Dpl1 - <i>Saccharomyces cerevisiae</i>       | 0 | 636  | 6  | 7  | 10 | 4  | 5.5  | 4.1  | 0.21 |
| An04g03680 | similarity to glucanase ZmGnsN4 from patent WO200073470-A2 - <i>Zea mays</i>                                     | 0 | 281  | 0  | 1  | 2  | 1  | 1.4  | 2.2  | 0.20 |
| An18g06230 | strong similarity to proteasome 19S regulatory particle subunit Rpt4 - <i>Saccharomyces cerevisiae</i> -         | 0 | 393  | 3  | 2  | 0  | 5  | 3.6  | 2.5  | 0.20 |
| An15g01680 | strong similarity to signal peptide-containing protein SIGP from patent WO9933981-A2 - <i>Homo sapiens</i>       | 5 | 355  | 0  | 2  | 3  | 2  | 1.8  | 2.8  | 0.20 |
| 55153      | strong similarity to nonribosomal peptide synthetase; NRPS [ <i>Hypocrea virens</i> ]                            | 0 | 5640 | 19 | 6  | 4  | 14 | 1.2  | 0.6  | 0.20 |
| An15g00160 | strong similarity to transcription regulator CaGCR3 - <i>Candida albicans</i> -                                  | 0 | 849  | 4  | 4  | 17 | 0  | 2.6  | 3.7  | 0.20 |
| An02g06530 | strong similarity to protein required for dispersion of mitochondria cluA - <i>Dictyostelium discoideum</i>      | 0 | 1249 | 6  | 3  | 16 | 4  | 2.0  | 3.0  | 0.20 |
| An15g03090 | strong similarity to C-3 sterol dehydrogenase/C-4 decarboxylase ERG26 - <i>Candida albicans</i>                  | 0 | 412  | 4  | 2  | 10 | 2  | 4.1  | 5.5  | 0.20 |
| An15g01690 | strong similarity to cytoplasmic ribosomal protein of the large subunit L14.a - <i>Saccharomyces cerevisiae</i>  | 0 | 149  | 8  | 9  | 11 | 11 | 30.6 | 27.2 | 0.19 |
| An18g02470 | strong similarity to vacuolar ATPase subunit D Vma-8 - <i>Neurospora crassa</i> -                                | 0 | 266  | 2  | 1  | 1  | 2  | 3.4  | 2.4  | 0.19 |
| An18g05180 | strong similarity to hypothetical membrane protein YCR044c - <i>Saccharomyces cerevisiae</i>                     | 7 | 374  | 1  | 1  | 3  | 2  | 1.7  | 2.7  | 0.19 |
| An14g05020 | strong similarity to armadillo repeat-containing protein Vac8 - <i>Saccharomyces cerevisiae</i> -                | 0 | 576  | 2  | 5  | 0  | 7  | 3.4  | 2.3  | 0.19 |
| An08g09230 | strong similarity to isotrichodermin C-15 hydroxylase Tri11 - <i>Fusarium sporotrichioides</i>                   | 1 | 500  | 3  | 3  | 2  | 4  | 3.4  | 2.3  | 0.19 |
| An16g02940 | strong similarity to protein fragment SEQ ID NO:69506 from patent EP1033405-A2 - <i>Zea mays</i>                 | 0 | 267  | 4  | 3  | 5  | 3  | 7.3  | 5.7  | 0.19 |
| An16g05050 | similarity to importin RanBP7 - <i>Homo sapiens</i>                                                              | 0 | 1045 | 4  | 3  | 5  | 1  | 1.9  | 1.1  | 0.19 |
| An03g05070 | strong similarity to proclavaminc acid amidino hydrolase pah - <i>Streptomyces clavuligerus</i>                  | 0 | 382  | 2  | 0  | 3  | 2  | 1.7  | 2.6  | 0.19 |
| An12g07510 | similarity to secreted protein #70 from patent WO9925825-A2 - <i>Homo sapiens</i>                                | 1 | 176  | 0  | 3  | 3  | 3  | 5.2  | 6.7  | 0.19 |
| An04g02020 | strong similarity to cyclophilin cypB - <i>Aspergillus nidulans</i>                                              | 2 | 212  | 6  | 24 | 29 | 19 | 37.4 | 41.3 | 0.19 |
| An02g12430 | precursor of mitochondrial isocitrate dehydrogenase icdA - <i>Aspergillus niger</i>                              | 0 | 413  | 5  | 4  | 2  | 8  | 6.0  | 4.6  | 0.19 |
| An07g08740 | weak similarity to 75 kDa invariant surface glycoprotein ISG75 - <i>Trypanosoma brucei</i>                       | 0 | 314  | 0  | 1  | 2  | 1  | 1.2  | 2.0  | 0.18 |
| An12g07850 | strong similarity to fumarate hydratase fumR - <i>Rhizopus oryzae</i>                                            | 0 | 533  | 7  | 14 | 13 | 12 | 10.5 | 8.6  | 0.18 |
| An08g00520 | strong similarity to protein sonA - <i>Aspergillus nidulans</i>                                                  | 0 | 359  | 2  | 2  | 2  | 2  | 3.3  | 2.3  | 0.18 |
| An09g06790 | secretion related GTPase srgB - <i>Aspergillus niger</i>                                                         | 0 | 201  | 6  | 12 | 13 | 10 | 24.0 | 21.1 | 0.18 |
| An07g10040 | strong similarity to coproporphyrinogen oxidase III Hem13 - <i>Saccharomyces cerevisiae</i>                      | 0 | 440  | 0  | 5  | 4  | 1  | 3.3  | 2.3  | 0.18 |
| An02g14080 | strong similarity to asparagine--tRNA ligase ASNS - <i>Thermus aquaticus</i>                                     | 0 | 574  | 4  | 7  | 11 | 1  | 5.2  | 3.9  | 0.18 |
| An07g10110 | strong similarity to 26S proteasome regulatory chain 12 rp12 - <i>Homo sapiens</i>                               | 0 | 356  | 3  | 2  | 6  | 4  | 4.0  | 5.3  | 0.18 |
| An01g08420 | strong similarity to calcium-binding protein precursor cnx1p - <i>Schizosaccharomyces pombe</i>                  | 1 | 562  | 31 | 60 | 95 | 49 | 42.4 | 46.4 | 0.18 |

|            |                                                                                                      |    |      |    |    |    |    |      |      |      |
|------------|------------------------------------------------------------------------------------------------------|----|------|----|----|----|----|------|------|------|
| An02g14100 | similarity to cDNA RNA-binding protein TIA-1 - Mus musculus                                          | 0  | 833  | 0  | 1  | 3  | 1  | 0.5  | 1.0  | 0.18 |
| An08g07840 | NADPH cytochrome P450 oxidoreductase cprA - Aspergillus niger [possible sequencing error]            | 1  | 695  | 20 | 51 | 80 | 35 | 26.8 | 30.0 | 0.18 |
| An11g09790 | strong similarity to sulfate adenylyltransferase sC - Aspergillus nidulans                           | 0  | 574  | 18 | 13 | 22 | 16 | 14.3 | 12.1 | 0.18 |
| An01g02430 | strong similarity to D-amino-acid oxidase DAO - Fusarium solani-                                     | 0  | 363  | 3  | 1  | 4  | 0  | 3.2  | 2.2  | 0.18 |
| An09g00620 | similarity to estradiol 17- $\beta$ -dehydrogenase HSD17B1 - Rattus norvegicus                       | 0  | 283  | 5  | 9  | 11 | 13 | 13.3 | 15.6 | 0.18 |
| An01g12720 | similarity to tumour suppressor protein TSA305 from patent WO9928457-A1 - Homo sapiens               | 0  | 689  | 2  | 6  | 5  | 3  | 3.2  | 2.2  | 0.18 |
| An15g00410 | strong similarity to acetate-inducible gene aciA - Aspergillus nidulans                              | 0  | 360  | 9  | 9  | 21 | 1  | 13.4 | 11.3 | 0.18 |
| An09g02800 | strong similarity to serine O-acetyltransferase cysA - Aspergillus nidulans                          | 14 | 1779 | 1  | 4  | 1  | 2  | 0.8  | 0.4  | 0.18 |
| An14g06530 | similarity to nucleoporin Nup192 - Saccharomyces cerevisiae-                                         | 0  | 1786 | 4  | 1  | 0  | 3  | 0.8  | 0.4  | 0.18 |
| An04g02800 | strong similarity to pyrroline-5-carboxylate reductase ProC - Pseudomonas aeruginosa                 | 0  | 286  | 6  | 1  | 1  | 7  | 6.8  | 5.4  | 0.18 |
| An08g04100 | strong similarity to serine palmitoyltransferase 2 Lcb2 - Saccharomyces cerevisiae                   | 1  | 676  | 3  | 2  | 8  | 3  | 2.1  | 3.1  | 0.18 |
| An04g03270 | strong similarity to proteasome 19S regulatory particle subunit Rpn2 - Saccharomyces cerevisiae      | 0  | 1147 | 4  | 2  | 12 | 2  | 1.5  | 2.3  | 0.17 |
| An16g01860 | strong similarity to protease involved in a-factor processing Ste23 - Saccharomyces cerevisiae       | 0  | 1167 | 0  | 6  | 10 | 4  | 1.4  | 2.2  | 0.17 |
| An18g06760 | strong similarity to NAD(+)-isocitrate dehydrogenase subunit I idh1 - Ajellomyces capsulatus         | 0  | 385  | 1  | 3  | 2  | 2  | 3.0  | 2.1  | 0.17 |
| An07g02990 | similarity to RNA-binding protein AUF1 - Homo sapiens                                                | 0  | 315  | 7  | 0  | 7  | 6  | 6.2  | 7.7  | 0.17 |
| An08g08600 | similarity to protein cw11p - Schizosaccharomyces pombe                                              | 4  | 325  | 4  | 10 | 6  | 11 | 11.6 | 9.7  | 0.17 |
| An01g06060 | strong similarity to GTP-binding protein rab11 - Rattus norvegicus                                   | 0  | 211  | 6  | 11 | 13 | 15 | 21.6 | 24.4 | 0.17 |
| An12g00220 | strong similarity to hypothetical protein EAA61911.1 - Aspergillus nidulans                          | 1  | 154  | 1  | 4  | 2  | 4  | 9.3  | 7.6  | 0.17 |
| An14g00220 | strong similarity to hypothetical protein SPAC17C9.06 - Schizosaccharomyces pombe                    | 0  | 514  | 9  | 17 | 21 | 23 | 13.4 | 15.6 | 0.17 |
| An16g05910 | strong similarity to cholesterol 7 $\alpha$ -hydroxylase CYP7 - Sus scrofa                           | 1  | 499  | 3  | 3  | 4  | 8  | 3.4  | 4.5  | 0.16 |
| An04g05300 | strong similarity to fructose-1,6-bisphosphatase fbpA - Aspergillus oryzae                           | 0  | 355  | 1  | 0  | 2  | 1  | 1.1  | 1.8  | 0.16 |
| An08g10490 | strong similarity to spindle pole body-associated protein dis1p - Schizosaccharomyces pombe          | 0  | 935  | 1  | 0  | 3  | 1  | 0.4  | 0.9  | 0.16 |
| An16g04940 | strong similarity to cytoplasmic ribosomal protein of the small subunit S12 AS1 - Podospora anserina | 0  | 153  | 4  | 4  | 4  | 6  | 14.5 | 12.4 | 0.16 |
| An02g04530 | strong similarity to cyclopropane-fatty-acyl-phospholipid synthase - Escherichia coli                | 2  | 510  | 3  | 11 | 13 | 12 | 7.4  | 9.0  | 0.16 |
| An16g04100 | strong similarity to transcription regulator protein Cdc39 - Saccharomyces cerevisiae-               | 0  | 2361 | 7  | 6  | 11 | 0  | 1.5  | 0.9  | 0.16 |
| An09g05950 | strong similarity to plasma membrane ATPase PMA1 - Kluyveromyces lactis                              | 9  | 1019 | 1  | 1  | 0  | 1  | 0.6  | 0.3  | 0.16 |
| An13g01080 | strong similarity to ATP phosphoribosyltransferase his1p - Schizosaccharomyces pombe                 | 0  | 307  | 3  | 1  | 7  | 1  | 3.8  | 5.0  | 0.16 |
| An04g02150 | similarity to amino acid system N transporter SN1 - Rattus norvegicus                                | 11 | 750  | 1  | 4  | 7  | 4  | 1.9  | 2.8  | 0.16 |
| An04g05930 | strong similarity to very long chain fatty acid synthase Tsc13 - Saccharomyces cerevisiae            | 6  | 309  | 0  | 4  | 5  | 3  | 3.8  | 5.0  | 0.16 |
| An04g05000 | strong similarity to hypothetical protein AN80 from patent WO9924580-A2 - Aspergillus nidulans       | 0  | 420  | 1  | 3  | 1  | 3  | 2.8  | 1.9  | 0.16 |
| An06g02180 | weak similarity to Traf2 and NCK interacting kinase (splice variant 8) - Homo sapiens                | 0  | 1053 | 3  | 1  | 2  | 1  | 1.1  | 0.6  | 0.16 |
| An16g04270 | strong similarity to vacuolar protein sorting-associated protein Vps35 - Saccharomyces cerevisiae    | 0  | 866  | 15 | 22 | 10 | 35 | 11.3 | 9.5  | 0.15 |
| An02g03250 | strong similarity to 3-isopropylmalate dehydratase LEU2 - Phycomyces blakesleeana                    | 0  | 772  | 5  | 0  | 10 | 1  | 1.9  | 2.7  | 0.15 |
| An01g13160 | strong similarity to $\alpha$ -isopropylmalate synthase Leu4 - Saccharomyces cerevisiae-             | 0  | 626  | 3  | 3  | 6  | 0  | 2.7  | 1.9  | 0.15 |
| An07g02190 | strong similarity to protein Sec7 - Saccharomyces cerevisiae                                         | 0  | 1793 | 1  | 0  | 1  | 4  | 0.2  | 0.6  | 0.15 |
| An16g02970 | strong similarity to cytoplasmic serine hydroxymethyltransferase Shm2 - Saccharomyces cerevisiae     | 0  | 471  | 27 | 17 | 54 | 17 | 24.6 | 27.4 | 0.15 |
| An08g06330 | strong similarity to $\epsilon$ -COP - Cricetulus griseus                                            | 0  | 324  | 1  | 3  | 3  | 5  | 3.6  | 4.7  | 0.15 |
| An12g01890 | strong similarity to squalene synthase ERG9 - Candida utilis                                         | 1  | 472  | 18 | 28 | 42 | 32 | 25.6 | 28.5 | 0.15 |
| An01g13070 | strong similarity to signal recognition particle receptor Sec63 - Saccharomyces cerevisiae           | 3  | 653  | 15 | 27 | 22 | 31 | 16.9 | 14.8 | 0.15 |
| An08g01790 | strong similarity to eukaryotic initiation factor 3H1 subunit TIF3H1 - Arabidopsis thaliana          | 0  | 365  | 4  | 3  | 7  | 6  | 5.3  | 6.7  | 0.15 |

|            |                                                                                                                |    |      |    |    |     |    |      |      |      |
|------------|----------------------------------------------------------------------------------------------------------------|----|------|----|----|-----|----|------|------|------|
| An11g01260 | similarity to hypothetical protein - Magnaporthe grisea                                                        | 2  | 492  | 1  | 1  | 2   | 3  | 1.3  | 2.0  | 0.15 |
| An01g00150 | strong similarity to nuclear protein Enp1 - Saccharomyces cerevisiae                                           | 0  | 493  | 2  | 0  | 3   | 2  | 1.3  | 2.0  | 0.15 |
| An03g04280 | strong similarity to pyridoxine synthesis component pyroA - Aspergillus nidulans                               | 0  | 309  | 8  | 12 | 19  | 14 | 17.3 | 19.6 | 0.14 |
| An02g14380 | hexokinase hxk - Aspergillus niger-                                                                            | 0  | 490  | 6  | 6  | 14  | 0  | 6.6  | 5.3  | 0.14 |
| An01g07860 | strong similarity to hypothetical membrane transport protein YGR125w - Saccharomyces cerevisiae                | 10 | 1066 | 1  | 0  | 2   | 2  | 0.4  | 0.8  | 0.14 |
| An17g00370 | strong similarity to hypothetical single-stranded TG1-3 binding protein tcg - Schizosaccharomyces pombe        | 0  | 361  | 10 | 4  | 14  | 10 | 10.5 | 12.2 | 0.14 |
| An10g00150 | strong similarity to cytochrome P450 monooxygenase TRI4 - Myrothecium roridum                                  | 2  | 508  | 2  | 0  | 2   | 3  | 1.3  | 2.0  | 0.14 |
| An05g00050 | strong similarity to prolidase - Suberites domuncula-                                                          | 0  | 466  | 2  | 2  | 4   | 0  | 2.5  | 1.7  | 0.14 |
| 204514     | strong similarity to UV excision repair protein (RadW), putative [Aspergillus clavatus NRRL 1]                 | 0  | 369  | 2  | 1  | 1   | 2  | 2.5  | 1.7  | 0.14 |
| An02g10440 | strong similarity to H <sup>+</sup> -transporting ATPase vma-1 - Neurospora crassa                             | 0  | 604  | 14 | 14 | 27  | 20 | 12.3 | 14.2 | 0.14 |
| An04g01530 | strong similarity to transport vesicle docking protein Pep12 - Saccharomyces cerevisiae                        | 1  | 273  | 4  | 11 | 6   | 19 | 14.8 | 16.8 | 0.14 |
| An17g02140 | strong similarity to vanadate resistance protein Van2 - Saccharomyces cerevisiae                               | 9  | 381  | 7  | 7  | 14  | 10 | 9.9  | 11.6 | 0.13 |
| An14g07200 | strong similarity to catalase C catC - Aspergillus nidulans-                                                   | 0  | 490  | 2  | 2  | 4   | 0  | 2.4  | 1.7  | 0.13 |
| An05g00880 | strong similarity to dnaJ protein homolog Scj1 - Saccharomyces cerevisiae                                      | 0  | 416  | 6  | 8  | 14  | 3  | 9.1  | 7.6  | 0.13 |
| An04g08800 | strong similarity to mitochondrial carrier Leu5 - Saccharomyces cerevisiae                                     | 1  | 435  | 0  | 1  | 2   | 1  | 0.9  | 1.5  | 0.13 |
| An04g01720 | similarity to DnaJ protein SIS1 - Cryptococcus curvatus                                                        | 0  | 355  | 3  | 6  | 7   | 9  | 7.0  | 8.4  | 0.13 |
| An18g05910 | strong similarity to hypothetical glycosyl transferase SPCC330.08 - Schizosaccharomyces pombe                  | 1  | 545  | 1  | 1  | 3   | 2  | 1.2  | 1.8  | 0.13 |
| An02g04000 | strong similarity to pyruvate dehydrogenase kinase isoform 2 - Zea mays                                        | 0  | 438  | 0  | 1  | 1   | 2  | 0.9  | 1.4  | 0.13 |
| An18g04840 | strong similarity to translation elongation factor 1 $\alpha$ - Podospora anserina [putative sequencing error] | 0  | 460  | 84 | 59 | 128 | 67 | 81.2 | 76.7 | 0.13 |
| An02g10700 | strong similarity to alkane-hydroxylating cytochrome P-450 CYP52A3-A - Candida maltosa                         | 1  | 506  | 2  | 2  | 2   | 2  | 2.3  | 1.6  | 0.13 |
| An09g05260 | strong similarity to cell division control protein Cdc12 - Saccharomyces cerevisiae                            | 0  | 383  | 2  | 2  | 7   | 1  | 3.1  | 4.0  | 0.13 |
| An06g01540 | strong similarity to serine C-palmitoyltransferase chain Lcb1 - Saccharomyces cerevisiae                       | 0  | 504  | 4  | 4  | 6   | 3  | 4.4  | 3.4  | 0.13 |
| An14g00990 | strong similarity to trifunctional protein of the $\beta$ -oxidation fox-2 - Neurospora crassa                 | 0  | 901  | 4  | 4  | 15  | 1  | 2.5  | 3.3  | 0.13 |
| An16g03320 | strong similarity to transport protein Sec24A - Homo sapiens                                                   | 0  | 1009 | 6  | 2  | 4   | 4  | 2.2  | 1.5  | 0.12 |
| An03g05200 | strong similarity to carboxypeptidase S1 - Penicillium janthinellum                                            | 0  | 566  | 9  | 3  | 10  | 4  | 5.7  | 4.6  | 0.12 |
| An16g07110 | strong similarity to acetyl-CoA hydrolase Ach1 - Saccharomyces cerevisiae                                      | 0  | 525  | 3  | 5  | 5   | 4  | 4.2  | 3.3  | 0.12 |
| An01g10340 | similarity to hypothetical fatty acid elongation protein Sur4 - Saccharomyces cerevisiae                       | 5  | 543  | 10 | 17 | 20  | 14 | 13.2 | 11.5 | 0.12 |
| An09g04010 | strong similarity to chitin synthase C chsC - Aspergillus fumigatus                                            | 7  | 914  | 0  | 7  | 2   | 5  | 2.1  | 1.5  | 0.12 |
| An07g09320 | similarity to 2-hydroxyruconate-semialdehyde hydrolase phnD - Pseudomonas sp.                                  | 0  | 408  | 2  | 2  | 5   | 3  | 2.9  | 3.8  | 0.12 |
| An03g02040 | strong similarity to cyclopropane-fatty-acyl-phospholipid synthase - Escherichia coli-                         | 0  | 428  | 2  | 1  | 0   | 3  | 2.1  | 1.5  | 0.12 |
| An14g03020 | similarity to secreted protein SEQ ID NO:58 from patent WO9957132-A1 - Homo sapiens                            | 5  | 737  | 2  | 1  | 1   | 6  | 1.2  | 1.8  | 0.12 |
| An02g09370 | similarity to translation initiation factor eIF-2 $\alpha$ chain EIF2A - Homo sapiens                          | 0  | 332  | 3  | 3  | 7   | 4  | 5.1  | 6.2  | 0.12 |
| An09g00670 | strong similarity to GPI-anchored $\beta$ (1-3)glucanosyltransferase gel3 - Aspergillus fumigatus              | 1  | 541  | 2  | 6  | 5   | 4  | 4.1  | 3.2  | 0.12 |
| An02g09250 | strong similarity to subunit of the vacuolar ATPase Vma6 - Saccharomyces cerevisiae                            | 0  | 362  | 6  | 5  | 9   | 10 | 8.3  | 9.7  | 0.12 |
| An15g02810 | similarity to phosphatidylinositol phosphate phosphatase Inp52 - Saccharomyces cerevisiae                      | 1  | 441  | 2  | 1  | 1   | 2  | 2.1  | 1.4  | 0.12 |
| An08g03910 | strong similarity to cytoplasmic ribosomal protein of the large subunit L10a - Rattus norvegicus               | 0  | 217  | 28 | 14 | 33  | 32 | 51.0 | 54.5 | 0.11 |
| An02g08450 | secretory AAA-ATPase nsfA - Aspergillus niger                                                                  | 0  | 728  | 5  | 4  | 11  | 6  | 3.4  | 4.3  | 0.11 |
| An08g02210 | strong similarity to RNase L inhibitor - Homo sapiens [putative sequencing error]                              | 0  | 782  | 7  | 5  | 12  | 10 | 4.2  | 5.2  | 0.11 |
| An14g03360 | strong similarity to choline-transport mutant SCT1 suppressor protein - Saccharomyces cerevisiae               | 4  | 711  | 5  | 11 | 12  | 7  | 6.0  | 4.9  | 0.11 |
| An02g14750 | strong similarity to actin-related protein - Homo sapiens                                                      | 0  | 472  | 0  | 3  | 2   | 1  | 1.9  | 1.3  | 0.11 |

|            |                                                                                                                    |    |      |    |    |    |    |      |      |      |
|------------|--------------------------------------------------------------------------------------------------------------------|----|------|----|----|----|----|------|------|------|
| An16g00920 | strong similarity to peroxisomal membrane protein PMP20 - <i>Candida boidinii</i>                                  | 0  | 166  | 1  | 1  | 3  | 1  | 3.9  | 4.9  | 0.11 |
| An08g05790 | strong similarity to glycogen phosphorylase Gph1 - <i>Saccharomyces cerevisiae</i>                                 | 0  | 881  | 16 | 17 | 38 | 3  | 9.9  | 8.5  | 0.11 |
| An16g08490 | strong similarity to dolichyl-phosphate-D-mannose--protein O-mannosyltransferase Pmt4 – <i>S. cerevisiae</i>       | 10 | 771  | 4  | 10 | 11 | 14 | 4.9  | 6.0  | 0.11 |
| An08g07020 | similarity to mannosyl transferase Alg9 - <i>Saccharomyces cerevisiae</i>                                          | 10 | 602  | 3  | 5  | 3  | 6  | 3.7  | 2.8  | 0.11 |
| An13g00740 | similarity to cyclopropane-fatty-acyl-phospholipid synthase - <i>Escherichia coli</i>                              | 2  | 517  | 10 | 30 | 35 | 29 | 20.4 | 22.5 | 0.10 |
| An01g03550 | strong similarity to urease URE1 - <i>Cryptococcus neoformans</i>                                                  | 0  | 831  | 1  | 2  | 6  | 1  | 1.1  | 1.6  | 0.10 |
| An16g04580 | strong similarity to hypothetical protein HSPC021 - <i>Homo sapiens</i>                                            | 2  | 476  | 13 | 15 | 18 | 18 | 15.6 | 13.8 | 0.10 |
| An16g09200 | strong similarity to U5 snRNP-specific protein U5-116kD - <i>Mus musculus</i>                                      | 0  | 990  | 3  | 1  | 6  | 3  | 1.2  | 1.7  | 0.10 |
| An18g01670 | 6-phosphofructokinase pfkA - <i>Aspergillus niger</i>                                                              | 0  | 783  | 4  | 2  | 10 | 2  | 2.2  | 2.9  | 0.10 |
| An02g13670 | similarity to human secreted protein fragment from patent WO9909155-A1 - <i>Homo sapiens</i>                       | 6  | 492  | 4  | 3  | 5  | 3  | 4.0  | 3.1  | 0.10 |
| An07g07830 | similarity to hypothetical protein YIL039w - <i>Saccharomyces cerevisiae</i>                                       | 2  | 564  | 1  | 0  | 1  | 2  | 0.7  | 1.1  | 0.10 |
| An02g03580 | strong similarity to lipid metabolism protein YER044c from patent WO200058521-A2 - <i>S. cerevisiae</i>            | 0  | 149  | 0  | 4  | 3  | 2  | 7.9  | 6.7  | 0.10 |
| An02g08080 | strong similarity to cytoplasmic ribosomal protein of the large subunit L22 - <i>Xenopus laevis</i>                | 0  | 124  | 5  | 7  | 10 | 6  | 26.2 | 24.0 | 0.10 |
| An02g09160 | strong similarity to hypothetical protein YOR311c - <i>Saccharomyces cerevisiae</i>                                | 5  | 384  | 1  | 5  | 5  | 2  | 4.4  | 3.5  | 0.10 |
| An01g08590 | strong similarity to hypothetical protein YKR088c - <i>Saccharomyces cerevisiae</i> -                              | 5  | 340  | 2  | 1  | 6  | 0  | 2.7  | 3.4  | 0.10 |
| An04g08830 | similarity to Golgi membrane protein Emp47 - <i>Saccharomyces cerevisiae</i>                                       | 1  | 415  | 7  | 21 | 23 | 22 | 17.9 | 19.8 | 0.10 |
| An11g03970 | similarity to hypothetical AAA family ATPase SCD8A.32c - <i>Streptomyces coelicolor</i>                            | 0  | 596  | 7  | 4  | 9  | 4  | 5.0  | 4.1  | 0.10 |
| An01g06120 | strong similarity to 4- $\alpha$ -glucanotransferase / amylo-16-glucosidase Gdb1 - <i>Saccharomyces cerevisiae</i> | 0  | 1539 | 1  | 13 | 15 | 0  | 2.5  | 1.8  | 0.09 |
| An14g04190 | strong similarity to 14- $\alpha$ -glucan branching enzyme Glc3 - <i>Saccharomyces cerevisiae</i>                  | 0  | 692  | 2  | 2  | 4  | 0  | 1.7  | 1.2  | 0.09 |
| An07g08280 | strong similarity to 3-Hydroxy-3-methylglutaryl-CoA reductase HMGR - <i>Gibberella fujikuroi</i>                   | 6  | 1114 | 9  | 25 | 13 | 29 | 8.1  | 6.9  | 0.09 |
| An01g01550 | strong similarity to catalase cat1 - <i>Aspergillus fumigatus</i>                                                  | 0  | 727  | 6  | 18 | 18 | 12 | 8.8  | 7.6  | 0.09 |
| An16g04330 | strong similarity to mannose phospho-dolichol synthase dpm1 - <i>Hypocrea jecorina</i>                             | 0  | 245  | 9  | 15 | 14 | 18 | 26.0 | 23.9 | 0.09 |
| An01g13220 | dnaK-type molecular chaperone lhsA - <i>Aspergillus niger</i>                                                      | 1  | 1000 | 13 | 64 | 82 | 40 | 20.2 | 22.1 | 0.09 |
| An11g11140 | strong similarity to nuclear pore membrane protein Pom152 - <i>Saccharomyces cerevisiae</i>                        | 0  | 1255 | 6  | 22 | 32 | 16 | 5.9  | 7.0  | 0.09 |
| An14g00180 | strong similarity to proteasome 19S regulatory particle subunit Rpt6 - <i>Saccharomyces cerevisiae</i>             | 0  | 389  | 3  | 0  | 5  | 1  | 2.3  | 3.0  | 0.08 |
| An08g06570 | strong similarity to transketolase Tkl1 - <i>Saccharomyces cerevisiae</i>                                          | 0  | 684  | 48 | 34 | 93 | 17 | 31.4 | 29.1 | 0.08 |
| An13g00710 | strong similarity to copper amine oxidase AO-I - <i>Aspergillus niger</i>                                          | 0  | 688  | 8  | 11 | 27 | 5  | 7.4  | 8.5  | 0.08 |
| An16g03640 | similarity to phosphatidylcholine-sterol O-acyltransferase Lcat - <i>Mus musculus</i>                              | 1  | 628  | 1  | 2  | 1  | 2  | 1.5  | 1.0  | 0.08 |
| An07g02360 | similarity to 6-hydroxy-D-nicotine oxidase 6-HDNO - <i>Arthrobacter oxidans</i>                                    | 0  | 551  | 8  | 8  | 16 | 4  | 7.8  | 6.7  | 0.08 |
| An18g05210 | similarity to multifunctional $\beta$ -oxidation protein - <i>Neurospora crassa</i>                                | 0  | 322  | 2  | 3  | 3  | 3  | 4.4  | 3.6  | 0.08 |
| An12g04710 | similarity to negative regulator of Cdc Fourty two Vtc1 - <i>Saccharomyces cerevisiae</i>                          | 3  | 808  | 9  | 15 | 22 | 8  | 7.9  | 6.8  | 0.08 |
| An15g06230 | strong similarity to aminonitrophenyl propanediol resistance protein Anp1 - <i>Saccharomyces cerevisiae</i>        | 1  | 491  | 2  | 4  | 8  | 3  | 3.4  | 4.2  | 0.08 |
| An04g05980 | strong similarity to v-SNARE Vti1 - <i>Saccharomyces cerevisiae</i>                                                | 1  | 224  | 5  | 10 | 6  | 18 | 18.0 | 19.7 | 0.08 |
| An02g09930 | strong similarity to subunit VI of cytochrome c oxidase Cox6 - <i>Saccharomyces cerevisiae</i>                     | 0  | 158  | 2  | 10 | 8  | 8  | 20.6 | 18.8 | 0.08 |
| An08g00830 | strong similarity to protein phosphatase type 2C Ptc2 - <i>Saccharomyces cerevisiae</i> -                          | 0  | 424  | 2  | 1  | 6  | 0  | 2.1  | 2.8  | 0.08 |
| An11g10200 | strong similarity to subunit VIa of cytochrome c oxidase Cox13 - <i>Saccharomyces cerevisiae</i>                   | 0  | 141  | 2  | 6  | 6  | 7  | 15.7 | 17.3 | 0.08 |
| An09g03070 | strong similarity to $\alpha$ -glucan synthase mok1p - <i>Schizosaccharomyces pombe</i>                            | 13 | 2426 | 2  | 16 | 19 | 15 | 2.0  | 2.6  | 0.07 |
| An04g05850 | strong similarity to cytoplasmic ribosomal protein of the small subunit rps6p - <i>Schizosaccharomyces pombe</i>   | 0  | 237  | 6  | 9  | 13 | 11 | 17.0 | 18.6 | 0.07 |
| An16g03370 | strong similarity to sensor/transporter protein for cell wall integrity Cwh43 - <i>Saccharomyces cerevisiae</i>    | 16 | 911  | 10 | 23 | 25 | 17 | 9.6  | 8.4  | 0.07 |
| An13g02980 | strong similarity to hypothetical protein FG01228.1 - <i>Fusarium graminearum</i>                                  | 0  | 180  | 1  | 3  | 4  | 3  | 6.5  | 7.5  | 0.07 |

|            |                                                                                                                     |   |      |     |    |     |     |      |      |      |
|------------|---------------------------------------------------------------------------------------------------------------------|---|------|-----|----|-----|-----|------|------|------|
| An06g00300 | similarity to phosphate/phosphoenolpyruvate translocator TABPPT8 - <i>Nicotiana tabacum</i>                         | 9 | 339  | 3   | 5  | 6   | 4   | 6.5  | 5.6  | 0.07 |
| An18g01320 | strong similarity to extracellular protease precursor Bar1 - <i>Saccharomyces cerevisiae</i>                        | 0 | 456  | 0   | 3  | 4   | 2   | 2.0  | 2.6  | 0.07 |
| An04g06320 | strong similarity to hypothetical protein SPAC19A8.14 - <i>Schizosaccharomyces pombe</i>                            | 1 | 215  | 2   | 2  | 5   | 0   | 5.4  | 4.6  | 0.07 |
| An14g01960 | strong similarity to aberrant X segregation Axs - <i>Drosophila melanogaster</i>                                    | 5 | 734  | 4   | 3  | 6   | 2   | 2.7  | 2.1  | 0.07 |
| An18g02740 | similarity to cytochrome P450 3A7 - <i>Homo sapiens</i>                                                             | 2 | 590  | 5   | 8  | 13  | 9   | 6.0  | 6.9  | 0.07 |
| An16g05090 | strong similarity to endonuclease SceI 75 kDa subunit Ens1 - <i>Saccharomyces cerevisiae</i>                        | 0 | 666  | 6   | 24 | 17  | 22  | 11.9 | 10.7 | 0.07 |
| An17g00780 | similarity to protease B processing protein Pbn1 - <i>Saccharomyces cerevisiae</i>                                  | 1 | 503  | 0   | 3  | 4   | 2   | 1.8  | 2.3  | 0.07 |
| An07g09800 | strong similarity to hypothetical polyphosphate synthase Vtc3 - <i>Saccharomyces cerevisiae</i>                     | 3 | 794  | 8   | 23 | 29  | 11  | 10.3 | 9.2  | 0.06 |
| An11g00510 | strong similarity to ATP citrate lyase ACL1 - <i>Sordaria macrospora</i>                                            | 0 | 656  | 54  | 55 | 100 | 49  | 43.4 | 41.1 | 0.06 |
| An02g09940 | strong similarity to $\alpha$ -1 2-mannosyltransferase Ktr1 - <i>Saccharomyces cerevisiae</i>                       | 1 | 398  | 8   | 10 | 21  | 8   | 12.1 | 13.4 | 0.06 |
| An12g00130 | strong similarity to mRNA processing protein of cytochrome c oxidase Mss51 - <i>Saccharomyces cerevisiae</i>        | 0 | 524  | 0   | 3  | 5   | 1   | 1.7  | 2.2  | 0.06 |
| An04g00220 | strong similarity to methionine-N-acetyltransferase Nat2 - <i>Saccharomyces cerevisiae</i>                          | 0 | 288  | 0   | 2  | 1   | 3   | 2.3  | 2.8  | 0.06 |
| 124807     | strong similarity to zinc binding enoyl reductase [ <i>Aspergillus fumigatus</i> Af293]                             | 0 | 357  | 3   | 4  | 6   | 6   | 5.5  | 6.3  | 0.06 |
| An15g03900 | strong similarity to heavy metal ion resistance protein Zrc1 - <i>Saccharomyces cerevisiae</i>                      | 5 | 431  | 0   | 5  | 1   | 5   | 3.3  | 2.7  | 0.06 |
| An11g03380 | similarity to monoglyceride lipase mgll - <i>Mus musculus</i>                                                       | 0 | 301  | 0   | 2  | 2   | 2   | 2.2  | 2.7  | 0.06 |
| 56745      | strong similarity to pre-mRNA splicing factor (Srp1), putative [ <i>Neosartorya fischeri</i> NRRL 181]              | 0 | 222  | 2   | 2  | 4   | 3   | 5.3  | 6.1  | 0.06 |
| An12g03960 | strong similarity to acyltransferase ataA - <i>Aspergillus nidulans</i>                                             | 2 | 293  | 3   | 7  | 6   | 7   | 9.3  | 8.3  | 0.06 |
| An04g08480 | strong similarity to cell division control protein SLY2 homolog YKL196c - <i>Saccharomyces cerevisiae</i>           | 0 | 196  | 4   | 2  | 5   | 5   | 8.6  | 9.7  | 0.06 |
| 53706      | strong similarity to C-4 methyl sterol oxidase Erg25 [ <i>Aspergillus fumigatus</i> Af293]                          | 2 | 298  | 4   | 6  | 9   | 4   | 9.2  | 8.2  | 0.06 |
| An12g03600 | strong similarity to diacylglycerol acyltransferase DAGAT - <i>Arabidopsis thaliana</i>                             | 9 | 456  | 5   | 0  | 4   | 2   | 3.1  | 2.6  | 0.06 |
| 211885     | strong similarity to polyketide synthase [ <i>Aspergillus fumigatus</i> Af293]                                      | 0 | 2443 | 115 | 77 | 146 | 111 | 20.5 | 19.0 | 0.06 |
| An05g00540 | strong similarity to cytoplasmic ribosomal protein of the large subunit L19 - <i>Saccharomyces cerevisiae</i>       | 0 | 201  | 5   | 12 | 11  | 12  | 22.7 | 21.1 | 0.06 |
| An06g01730 | strong similarity to mtRNA splice defect-suppressing mitochondrial carrier Mrs3 - <i>Saccharomyces cerevisiae</i>   | 0 | 319  | 0   | 2  | 1   | 3   | 2.0  | 2.5  | 0.06 |
| An02g02340 | strong similarity to chitin synthase with a myosin motor-like domain csmA - <i>Aspergillus nidulans</i>             | 6 | 1760 | 6   | 14 | 18  | 17  | 3.0  | 3.6  | 0.06 |
| An04g05490 | strong similarity to protein fragment SEQ ID NO:4306 from patent EP1033405-A2 - <i>Arabidopsis thaliana</i>         | 0 | 469  | 1   | 4  | 6   | 0   | 3.1  | 2.5  | 0.05 |
| An18g03490 | similarity to cation-dependent mannose 6-phosphate receptor precursor CD-MPR-Bos taurus                             | 1 | 324  | 0   | 2  | 2   | 2   | 2.0  | 2.5  | 0.05 |
| An12g01320 | strong similarity to linoleate diol synthase - <i>Gaeumannomyces graminis</i>                                       | 0 | 1181 | 2   | 3  | 8   | 2   | 1.2  | 1.6  | 0.05 |
| An16g01730 | similarity to acid phosphatase precursor rPAP - <i>Rattus norvegicus</i>                                            | 1 | 476  | 2   | 3  | 3   | 3   | 3.0  | 2.5  | 0.05 |
| An07g02170 | similarity to transport protein Bos1 - <i>Saccharomyces cerevisiae</i>                                              | 1 | 244  | 1   | 3  | 1   | 6   | 4.8  | 5.5  | 0.05 |
| An08g10060 | strong similarity to small G-protein Gsp1 - <i>Candida albicans</i>                                                 | 0 | 214  | 3   | 3  | 7   | 3   | 7.9  | 8.9  | 0.05 |
| An07g05570 | strong similarity to chitin synthase chs1 - <i>Aspergillus nidulans</i>                                             | 7 | 915  | 0   | 4  | 6   | 2   | 1.3  | 1.7  | 0.05 |
| An02g07600 | strong similarity to succinate dehydrogenase Sdh1 - <i>Saccharomyces cerevisiae</i>                                 | 0 | 656  | 3   | 6  | 4   | 7   | 3.8  | 3.2  | 0.05 |
| An13g01220 | strong similarity to hypothetical suppressor of bem1/bud5 bem46p - <i>Schizosaccharomyces pombe</i>                 | 0 | 292  | 3   | 4  | 4   | 5   | 6.7  | 5.9  | 0.05 |
| An08g03493 | strong similarity to hypothetical protein AN1161.2 - <i>Aspergillus nidulans</i>                                    | 2 | 108  | 0   | 3  | 2   | 2   | 8.4  | 7.5  | 0.05 |
| An07g03190 | strong similarity to RNase III domain protein Afu5g09670 - <i>Aspergillus fumigatus</i> [putative sequencing error] | 0 | 339  | 1   | 1  | 1   | 3   | 1.9  | 2.4  | 0.05 |
| An04g03930 | lysine aminopeptidase apsA - <i>Aspergillus niger</i>                                                               | 0 | 881  | 14  | 19 | 41  | 2   | 9.9  | 8.9  | 0.05 |
| An18g03810 | strong similarity to cytoplasmic ribosomal protein of the large subunit L13a - <i>Saccharomyces cerevisiae</i>      | 0 | 202  | 9   | 7  | 14  | 11  | 21.3 | 22.8 | 0.05 |
| 54765      | strong similarity to tetratricopeptide repeat domain protein [ <i>Neosartorya fischeri</i> NRRL 181]                | 0 | 300  | 2   | 5  | 5   | 4   | 6.5  | 5.7  | 0.05 |
| An09g00500 | weak similarity to transcription factor Arg81 - <i>Saccharomyces cerevisiae</i>                                     | 1 | 874  | 4   | 9  | 9   | 7   | 4.0  | 3.4  | 0.05 |
| An11g11250 | strong similarity to interferon-induced dsRNA-activated protein kinase inhibitor P58 - <i>Homo sapiens</i>          | 0 | 507  | 4   | 7  | 8   | 6   | 5.9  | 5.2  | 0.05 |

|            |                                                                                                              |    |      |    |    |    |    |      |      |      |
|------------|--------------------------------------------------------------------------------------------------------------|----|------|----|----|----|----|------|------|------|
| An01g14250 | strong similarity to $\delta$ subunit of the coatomer $\delta$ -coat protein CopD - Bos taurus [deleted ORF] | 0  | 518  | 3  | 2  | 2  | 4  | 2.8  | 2.3  | 0.05 |
| An02g00110 | strong similarity to hypothetical protein encoded by An11g10340 - Aspergillus niger-                         | 0  | 318  | 1  | 3  | 5  | 0  | 3.7  | 3.1  | 0.05 |
| An12g01360 | strong similarity to hypothetical cytochrome P450 protein 2E4.050 - Neurospora crassa                        | 2  | 592  | 7  | 7  | 16 | 7  | 6.4  | 7.2  | 0.05 |
| An03g03770 | strong similarity to squalene monooxygenase - Rattus norvegicus                                              | 3  | 512  | 11 | 21 | 23 | 20 | 16.5 | 15.3 | 0.04 |
| An07g03570 | strong similarity to sorbitol utilization protein sou2 - Candida albicans                                    | 0  | 293  | 1  | 3  | 6  | 1  | 4.0  | 4.6  | 0.04 |
| An01g02840 | strong similarity to translation initiation factor IF2 - Homo sapiens                                        | 0  | 1061 | 5  | 4  | 13 | 3  | 2.3  | 2.8  | 0.04 |
| An07g03880 | serine proteinase pepC - Aspergillus niger                                                                   | 0  | 497  | 2  | 5  | 10 | 2  | 3.9  | 4.5  | 0.04 |
| An16g08150 | strong similarity to dipeptidyl-peptidase V DPP V - Aspergillus fumigatus                                    | 0  | 732  | 8  | 12 | 9  | 17 | 7.3  | 6.5  | 0.04 |
| An12g00790 | strong similarity to stress-induced protein Sti1 - Saccharomyces cerevisiae-                                 | 0  | 629  | 1  | 4  | 6  | 0  | 2.3  | 1.9  | 0.04 |
| An07g09270 | strong similarity to hypothetical protein SPAC1F12.09 - Schizosaccharomyces pombe                            | 2  | 812  | 0  | 3  | 3  | 3  | 1.1  | 1.4  | 0.04 |
| An01g14070 | strong similarity to karyopherin $\beta$ Kap95 - Saccharomyces cerevisiae-                                   | 0  | 880  | 4  | 11 | 19 | 0  | 4.6  | 4.0  | 0.04 |
| An01g06560 | strong similarity to argininosuccinate lyase ASAL - Candida albicans                                         | 0  | 464  | 16 | 10 | 30 | 5  | 14.9 | 13.8 | 0.04 |
| An01g10000 | strong similarity to ATP-binding cassette transporter abc1p - Schizosaccharomyces pombe                      | 14 | 1501 | 0  | 1  | 2  | 1  | 0.3  | 0.4  | 0.04 |
| An04g01950 | strong similarity to zinc-metalloprotease Ste24 - Saccharomyces cerevisiae                                   | 5  | 456  | 9  | 14 | 20 | 16 | 13.4 | 14.4 | 0.04 |
| An15g00980 | strong similarity to maintaining mitochondrial morphology protein MMM1 - Neurospora crassa                   | 1  | 484  | 2  | 0  | 2  | 2  | 1.3  | 1.7  | 0.04 |
| An01g13920 | strong similarity to adenylosuccinate synthase ade2p - Schizosaccharomyces pombe                             | 0  | 424  | 5  | 2  | 4  | 5  | 4.6  | 4.0  | 0.04 |
| An01g05510 | strong similarity to GABA-A receptor $\epsilon$ -like subunit - Homo sapiens                                 | 0  | 320  | 4  | 2  | 6  | 4  | 5.3  | 5.9  | 0.04 |
| An13g03940 | strong similarity to long-chain-acyl-CoA dehydrogenase precursor LCAD - Rattus norvegicus                    | 0  | 415  | 1  | 3  | 3  | 2  | 2.8  | 2.4  | 0.04 |
| An07g06080 | strong similarity to casein kinase-1 homolog hhp1p - Schizosaccharomyces pombe                               | 0  | 370  | 3  | 1  | 2  | 5  | 3.2  | 3.7  | 0.04 |
| An18g03200 | strong similarity to actin like protein act2p - Schizosaccharomyces pombe                                    | 0  | 439  | 4  | 3  | 5  | 4  | 4.4  | 3.9  | 0.04 |
| An04g07020 | strong similarity to syntaxin Tlg2 - Saccharomyces cerevisiae                                                | 0  | 373  | 2  | 2  | 2  | 5  | 3.1  | 3.6  | 0.04 |
| An07g06430 | strong similarity to glycoprotein glucosyltransferase gpt1p - Schizosaccharomyces pombe                      | 0  | 1495 | 12 | 40 | 53 | 29 | 9.1  | 10.0 | 0.03 |
| An02g04250 | similarity to protein p58 - Rattus norvegicus                                                                | 1  | 324  | 8  | 14 | 16 | 18 | 18.1 | 19.2 | 0.03 |
| An18g02720 | strong similarity to hypothetical glutathione S-transferase CAA19067.1 - Schizosaccharomyces pombe           | 0  | 226  | 1  | 5  | 7  | 1  | 7.5  | 6.8  | 0.03 |
| An08g01000 | strong similarity to aspartate transaminase aspC - Methanobacterium thermoformicicum                         | 0  | 386  | 2  | 2  | 6  | 1  | 3.0  | 3.5  | 0.03 |
| An02g04880 | strong similarity to arginine--tRNA ligase Msr1 - Saccharomyces cerevisiae                                   | 0  | 646  | 3  | 4  | 10 | 2  | 3.0  | 3.5  | 0.03 |
| An05g00410 | strong similarity to serine hydroxymethyl-transferase I Shm1 - Candida albicans                              | 0  | 534  | 1  | 1  | 4  | 0  | 1.2  | 1.5  | 0.03 |
| An18g06220 | strong similarity to $\alpha$ -mannosidase Mns1 - Saccharomyces cerevisiae                                   | 1  | 663  | 0  | 7  | 10 | 2  | 2.9  | 3.4  | 0.03 |
| An02g08670 | strong similarity to hypothetical phosphate/PEP translocator protein At2g25520 - Arabidopsis thaliana        | 11 | 399  | 1  | 3  | 4  | 3  | 2.9  | 3.4  | 0.03 |
| An07g03740 | strong similarity to hypothetical protein SPAC25H1.07 - Schizosaccharomyces pombe                            | 1  | 946  | 21 | 43 | 38 | 49 | 17.7 | 16.7 | 0.03 |
| An15g01740 | similarity to succinate-semialdehyde dehydrogenase NAD(P) <sup>+</sup> gabD - Escherichia coli               | 0  | 650  | 6  | 10 | 9  | 12 | 6.6  | 6.0  | 0.03 |
| An09g05870 | strong similarity to nucleoside-diphosphate kinase NDK-1 - Neurospora crassa                                 | 0  | 153  | 12 | 6  | 13 | 12 | 31.5 | 30.1 | 0.03 |
| An18g05230 | strong similarity to proteasome 19S regulatory particle subunit Rpt5 - Saccharomyces cerevisiae              | 0  | 464  | 3  | 1  | 3  | 2  | 2.5  | 2.1  | 0.03 |
| An11g04370 | strong similarity to cytochrome b5 - Mortierella alpina                                                      | 1  | 138  | 5  | 6  | 9  | 8  | 21.7 | 22.9 | 0.03 |
| An09g05880 | strong similarity to $\alpha$ -glucosidase ModA - Dictyostelium discoideum                                   | 1  | 957  | 32 | 69 | 91 | 62 | 27.6 | 28.9 | 0.03 |
| An16g07620 | endoplasmic reticulum oxidising protein EroA - Aspergillus niger                                             | 0  | 600  | 4  | 7  | 12 | 6  | 5.0  | 5.6  | 0.03 |
| An07g10100 | strong similarity to adenylate kinase Adk1 - Saccharomyces cerevisiae                                        | 0  | 258  | 5  | 24 | 20 | 24 | 29.8 | 31.1 | 0.03 |
| An18g05890 | similarity to pyruvate dehydrogenase phosphatase isoenzyme 1 PDP1 - Rattus norvegicus                        | 0  | 602  | 4  | 11 | 14 | 10 | 6.7  | 7.3  | 0.03 |
| An03g05010 | strong similarity to cell wall biosynthesis protein MNN9 - Candida albicans                                  | 1  | 392  | 2  | 4  | 2  | 8  | 4.3  | 4.8  | 0.03 |
| An14g05510 | strong similarity to dihydrosphingosine-1-phosphate phosphatase Ysr3 - Saccharomyces cerevisiae              | 5  | 533  | 3  | 4  | 3  | 6  | 3.7  | 3.2  | 0.03 |



|            |                                                                                                                 |   |      |    |    |    |    |      |      |      |
|------------|-----------------------------------------------------------------------------------------------------------------|---|------|----|----|----|----|------|------|------|
| An07g02960 | strong similarity to cytoplasmic ribosomal protein of the small subunit S13.e - <i>Saccharomyces cerevisiae</i> | 0 | 151  | 3  | 8  | 10 | 7  | 19.8 | 20.9 | 0.03 |
| An07g09830 | strong similarity to hypothetical protein encoded by B19C19.110 - <i>Neurospora crassa</i>                      | 1 | 517  | 2  | 2  | 4  | 1  | 2.3  | 1.9  | 0.03 |
| An18g06270 | strong similarity to 14-3-3 protein homolog artA - <i>Aspergillus nidulans</i>                                  | 0 | 272  | 17 | 14 | 26 | 17 | 30.1 | 28.8 | 0.03 |
| An01g08850 | strong similarity to Gβ like protein cpcB - <i>Aspergillus nidulans</i>                                         | 0 | 316  | 11 | 8  | 14 | 12 | 16.1 | 15.1 | 0.03 |
| An15g01860 | strong similarity to malate synthase acuE - <i>Aspergillus nidulans</i> -                                       | 0 | 542  | 2  | 2  | 0  | 5  | 2.2  | 1.8  | 0.03 |
| An13g00780 | strong similarity to hypothetical protein CAD21419.1 - <i>Neurospora crassa</i>                                 | 1 | 286  | 4  | 2  | 2  | 6  | 5.9  | 5.4  | 0.03 |
| An14g03910 | strong similarity to α-1 2-mannosyltransferase kre2 - <i>Candida albicans</i>                                   | 1 | 392  | 5  | 11 | 16 | 9  | 11.0 | 11.7 | 0.03 |
| An18g03010 | strong similarity to 26S proteasome regulatory subunit S2 - <i>Homo sapiens</i>                                 | 0 | 906  | 11 | 16 | 25 | 11 | 7.9  | 7.3  | 0.03 |
| An09g02540 | similarity to hypothetical membrane protein YIL067c - <i>Saccharomyces cerevisiae</i>                           | 7 | 681  | 0  | 2  | 3  | 1  | 1.0  | 1.2  | 0.03 |
| An12g07570 | strong similarity to synaptobrevin Snc2 - <i>Saccharomyces cerevisiae</i>                                       | 1 | 135  | 1  | 2  | 2  | 3  | 6.7  | 7.3  | 0.03 |
| An11g06770 | strong similarity to skin cell protein from patent WO9955865-A1 - <i>Rattus sp.</i> -                           | 1 | 593  | 2  | 2  | 0  | 5  | 2.0  | 1.7  | 0.03 |
| An02g08300 | strong similarity to hypothetical protein EAL85123.1 - <i>Aspergillus fumigatus</i>                             | 0 | 164  | 3  | 6  | 13 | 1  | 15.1 | 15.9 | 0.02 |
| An10g00530 | strong similarity to myo-inositol-1-phosphate synthase INO1 - <i>Arabidopsis thaliana</i>                       | 0 | 533  | 44 | 25 | 65 | 31 | 33.9 | 32.7 | 0.02 |
| An02g12640 | strong similarity to RNA-binding protein 30 - <i>Nicotiana plumbaginifolia</i> -                                | 0 | 538  | 3  | 1  | 7  | 0  | 2.2  | 2.5  | 0.02 |
| An11g02590 | strong similarity to peroxisomal membrane protein Pmp27 - <i>Saccharomyces cerevisiae</i>                       | 0 | 235  | 1  | 2  | 2  | 2  | 3.9  | 3.5  | 0.02 |
| An18g06050 | strong similarity to casein kinase i homolog cki1p - <i>Schizosaccharomyces pombe</i>                           | 1 | 567  | 1  | 3  | 3  | 4  | 2.1  | 2.4  | 0.02 |
| An12g08030 | strong similarity to NADH oxidoreductase complex I subunit Sub2 - <i>Saccharomyces cerevisiae</i>               | 0 | 440  | 7  | 2  | 3  | 9  | 5.6  | 5.1  | 0.02 |
| 225665     | strong similarity to hypothetical protein AFUB 053450, putative Sec12 homologue - <i>Aspergillus fumigatus</i>  | 0 | 622  | 7  | 13 | 17 | 10 | 8.6  | 8.0  | 0.02 |
| An08g04910 | strong similarity to 22 kD subunit NADH:ubiquinone reductase - <i>Neurospora crassa</i>                         | 0 | 159  | 0  | 3  | 2  | 3  | 5.7  | 6.2  | 0.02 |
| An16g04170 | strong similarity to acetolactate synthase protein from patent EP257993-A - <i>Saccharomyces cerevisiae</i> -   | 0 | 690  | 2  | 2  | 0  | 5  | 1.7  | 1.4  | 0.02 |
| An02g02010 | strong similarity to cytoplasmic tyrosine--tRNA ligase Tyrrs - <i>Saccharomyces cerevisiae</i>                  | 0 | 382  | 2  | 4  | 6  | 2  | 4.4  | 4.0  | 0.02 |
| An16g05260 | strong similarity to eukaryotic translation initiation factor 3 subunit p42 - <i>Homo sapiens</i>               | 0 | 288  | 2  | 1  | 2  | 2  | 3.2  | 2.8  | 0.02 |
| An07g02650 | strong similarity to translation elongation factor 3 Yef3 - <i>Saccharomyces cerevisiae</i>                     | 0 | 1064 | 55 | 48 | 99 | 44 | 25.3 | 24.3 | 0.02 |
| An15g03780 | strong similarity to ras pathway interacting protein moe1p - <i>Schizosaccharomyces pombe</i>                   | 0 | 586  | 3  | 3  | 6  | 4  | 2.9  | 3.2  | 0.02 |
| An07g03430 | strong similarity to hypothetical protein CAD70902.1 - <i>Neurospora crassa</i>                                 | 0 | 294  | 2  | 1  | 2  | 2  | 3.1  | 2.8  | 0.02 |
| An02g12420 | strong similarity to trifunctional C1-tetrahydrofolate synthase Ade3 - <i>Saccharomyces cerevisiae</i>          | 0 | 930  | 1  | 1  | 3  | 1  | 0.7  | 0.9  | 0.02 |
| An03g02525 | similarity to hypothetical proteinase encoded by 2SC3B6.04c - <i>Streptomyces coelicolor</i>                    | 0 | 199  | 1  | 6  | 9  | 2  | 9.8  | 10.4 | 0.02 |
| An07g07760 | strong similarity to DNA damage checkpoint protein rad24p - <i>Schizosaccharomyces pombe</i>                    | 0 | 260  | 18 | 12 | 27 | 15 | 30.5 | 29.5 | 0.02 |
| An08g08750 | carboxypeptidase Y cpy from patent WO9609397-A1 - <i>Aspergillus niger</i> -                                    | 0 | 557  | 1  | 8  | 12 | 0  | 4.4  | 4.0  | 0.02 |
| An15g00070 | strong similarity to malate dehydrogenase precursor MDH - <i>Mus musculus</i>                                   | 0 | 330  | 8  | 11 | 19 | 10 | 15.4 | 16.1 | 0.02 |
| An18g03980 | strong similarity to glutamate carboxypeptidase II - <i>Rattus norvegicus</i> -                                 | 1 | 765  | 1  | 3  | 7  | 0  | 1.5  | 1.8  | 0.02 |
| An01g04690 | strong similarity to peroxisomal transporter Ant1 - <i>Saccharomyces cerevisiae</i>                             | 3 | 335  | 1  | 2  | 2  | 2  | 2.7  | 2.4  | 0.02 |
| An04g05880 | strong similarity to linoleate diol synthase - <i>Gaeumannomyces graminis</i>                                   | 0 | 1080 | 7  | 16 | 29 | 7  | 5.7  | 6.1  | 0.02 |
| An01g11960 | similarity to brefeldin A resistance protein Bfr1 - <i>Saccharomyces cerevisiae</i> -                           | 0 | 506  | 4  | 2  | 8  | 0  | 3.3  | 3.0  | 0.02 |
| An14g04940 | strong similarity to mRNA turnover 4 protein Mrt4 - <i>Saccharomyces cerevisiae</i>                             | 0 | 234  | 3  | 2  | 5  | 3  | 6.1  | 6.6  | 0.01 |
| An11g01550 | strong similarity to cytochrome P450 52A4 - <i>Candida maltosa</i>                                              | 0 | 521  | 5  | 1  | 5  | 3  | 3.2  | 2.9  | 0.01 |
| An08g07050 | strong similarity to 189 kD subunit of DNA-directed RNA polymerase I rpa190p - <i>Schizosaccharomyces pombe</i> | 0 | 1680 | 5  | 3  | 8  | 2  | 1.3  | 1.1  | 0.01 |
| An01g06970 | strong similarity to D-arabinose dehydrogenase Ara1 - <i>Saccharomyces cerevisiae</i>                           | 0 | 325  | 6  | 7  | 16 | 4  | 10.8 | 11.4 | 0.01 |
| An08g04250 | strong similarity to dynamin-related protein msp1p - <i>Schizosaccharomyces pombe</i>                           | 0 | 919  | 2  | 2  | 2  | 5  | 1.3  | 1.5  | 0.01 |
| An18g05170 | similarity to phosphoacetylglucosamine mutase AGM1 - <i>Candida albicans</i>                                    | 0 | 552  | 4  | 2  | 7  | 1  | 3.1  | 2.8  | 0.01 |

|            |                                                                                                                |    |      |    |    |    |    |      |      |      |
|------------|----------------------------------------------------------------------------------------------------------------|----|------|----|----|----|----|------|------|------|
| An18g03310 | strong similarity to cytoplasmic ribosomal protein of the small subunit S3 - <i>Saccharomyces cerevisiae</i>   | 0  | 266  | 18 | 8  | 24 | 15 | 25.9 | 26.8 | 0.01 |
| An07g03660 | similarity to hypothetical protein CAD37045.1 - <i>Neurospora crassa</i>                                       | 0  | 263  | 0  | 5  | 1  | 7  | 5.4  | 5.8  | 0.01 |
| An09g06680 | citrate synthase citA - <i>Aspergillus niger</i>                                                               | 0  | 474  | 19 | 19 | 27 | 30 | 21.1 | 21.9 | 0.01 |
| An02g12010 | strong similarity to inorganic pyrophosphatase Ipp1 - <i>Saccharomyces cerevisiae</i>                          | 0  | 406  | 6  | 9  | 22 | 1  | 9.9  | 10.4 | 0.01 |
| An11g03230 | strong similarity to cytochrome P450 sterol $\delta$ 22-desaturase Erg5 - <i>Saccharomyces cerevisiae</i>      | 0  | 534  | 10 | 13 | 22 | 13 | 11.5 | 12.0 | 0.01 |
| An02g13250 | strong similarity to water channel protein aquaporin 3 AQP3 - <i>Rattus norvegicus</i>                         | 6  | 285  | 2  | 1  | 4  | 1  | 3.2  | 3.5  | 0.01 |
| An02g11720 | strong similarity to $\alpha$ -mannosidase msd2 - <i>Aspergillus nidulans</i>                                  | 0  | 1089 | 1  | 3  | 3  | 4  | 1.1  | 1.2  | 0.01 |
| 53140      | strong similarity to mitochondrial cytochrome b2, putative [ <i>Aspergillus flavus</i> NRRL3357]               | 0  | 477  | 1  | 2  | 4  | 0  | 1.9  | 1.7  | 0.01 |
| An02g09910 | strong similarity to fatty acid elongase Fen1 - <i>Saccharomyces cerevisiae</i>                                | 7  | 342  | 5  | 4  | 6  | 8  | 7.2  | 7.6  | 0.01 |
| An01g07640 | similarity to hypothetical membrane protein YPL087w - <i>Saccharomyces cerevisiae</i>                          | 7  | 299  | 2  | 1  | 3  | 2  | 3.0  | 3.3  | 0.01 |
| An07g09110 | similarity to monooxygenase VioC - <i>Chromobacterium violaceum</i>                                            | 0  | 499  | 0  | 3  | 2  | 2  | 1.8  | 1.6  | 0.01 |
| An17g02290 | strong similarity to myosin Myo2 - <i>Saccharomyces cerevisiae</i>                                             | 0  | 1572 | 2  | 0  | 2  | 2  | 0.4  | 0.5  | 0.01 |
| An15g01700 | strong similarity to nascent polypeptide-associated complex $\alpha$ chain $\alpha$ -NAC - <i>Mus musculus</i> | 0  | 202  | 3  | 2  | 6  | 1  | 7.1  | 6.7  | 0.01 |
| An01g08780 | strong similarity to high affinity hexose transporter Hxt1 - <i>Saccharomyces cerevisiae</i>                   | 10 | 540  | 2  | 1  | 2  | 2  | 1.7  | 1.5  | 0.01 |
| An01g14200 | strong similarity to fatty acid hydroxylase Scs7 - <i>Saccharomyces cerevisiae</i>                             | 3  | 372  | 4  | 3  | 8  | 3  | 5.2  | 5.6  | 0.01 |
| An04g05380 | strong similarity to cell wall antigen 6C5 from patent WO200048620-A1 - <i>Candida albicans</i>                | 0  | 348  | 2  | 1  | 3  | 2  | 2.6  | 2.9  | 0.01 |
| An04g06310 | strong similarity to hypothetical protein CAB91735.2 - <i>Neurospora crassa</i>                                | 1  | 257  | 3  | 7  | 7  | 7  | 10.6 | 10.2 | 0.01 |
| An08g10670 | strong similarity to mitogen-activated protein kinase FsMAPK - <i>Fusarium solani</i>                          | 0  | 354  | 0  | 3  | 3  | 2  | 2.6  | 2.8  | 0.01 |
| An02g09470 | strong similarity to hypothetical Ca <sup>2+</sup> -transporting ATPase Spf1 - <i>Saccharomyces cerevisiae</i> | 0  | 1277 | 30 | 55 | 83 | 44 | 17.4 | 18.0 | 0.01 |
| An11g10630 | similarity to translation initiation factor 3 complex protein Prt1 - <i>Homo sapiens</i>                       | 0  | 591  | 1  | 2  | 3  | 1  | 1.5  | 1.4  | 0.01 |
| An03g04660 | weak similarity to hypothetical protein YGR165w - <i>Saccharomyces cerevisiae</i> -                            | 0  | 387  | 4  | 3  | 0  | 11 | 5.0  | 5.4  | 0.01 |
| An02g01260 | weak similarity to $\beta$ transducin-like protein het-e1 - <i>Podospira anserina</i>                          | 0  | 1404 | 2  | 2  | 1  | 6  | 0.8  | 1.0  | 0.01 |
| An11g04650 | similarity to $\alpha$ -complex protein 1 CP-1 - <i>Homo sapiens</i>                                           | 0  | 421  | 4  | 3  | 6  | 5  | 4.6  | 4.9  | 0.01 |
| An02g07470 | strong similarity to fructose-bisphosphate aldolase Fba1 - <i>Saccharomyces cerevisiae</i>                     | 0  | 360  | 9  | 6  | 18 | 3  | 11.2 | 10.8 | 0.01 |
| An07g09550 | strong similarity to mitochondrial ribosomal protein Nam9 - <i>Saccharomyces cerevisiae</i>                    | 0  | 436  | 3  | 0  | 1  | 4  | 2.1  | 2.3  | 0.01 |
| An09g00260 | $\alpha$ -galactosidase aglC - <i>Aspergillus niger</i>                                                        | 0  | 748  | 1  | 2  | 2  | 2  | 1.2  | 1.1  | 0.01 |
| An02g09260 | strong similarity to nucleolar protein Nop5 - <i>Saccharomyces cerevisiae</i>                                  | 0  | 580  | 5  | 3  | 6  | 5  | 3.8  | 3.6  | 0.01 |
| An07g09920 | strong similarity to NADH-dependent glutamate synthase NADH-GOGAT - <i>Medicago sativa</i>                     | 0  | 2126 | 38 | 12 | 66 | 10 | 6.2  | 6.5  | 0.01 |
| An01g10750 | strong similarity to hypothetical acid phosphatase CAB58405.1 - <i>Schizosaccharomyces pombe</i>               | 0  | 603  | 6  | 7  | 11 | 7  | 5.8  | 5.5  | 0.01 |
| An14g02080 | strong similarity to prolidase - <i>Aureobacterium anophageum</i>                                              | 0  | 480  | 2  | 3  | 6  | 2  | 3.0  | 3.2  | 0.01 |
| An14g03110 | strong similarity to cytochrome P450 monooxygenase TRI4 - <i>Myrothecium roridum</i>                           | 0  | 521  | 2  | 1  | 3  | 2  | 1.7  | 1.9  | 0.01 |
| An18g05820 | strong similarity to hypothetical protein SPAC24C9.05c - <i>Schizosaccharomyces pombe</i>                      | 1  | 609  | 0  | 9  | 4  | 10 | 4.1  | 4.3  | 0.01 |
| An03g02770 | strong similarity to hypothetical protein YLR361c - <i>Saccharomyces cerevisiae</i>                            | 2  | 551  | 0  | 3  | 3  | 2  | 1.7  | 1.8  | 0.01 |
| An02g13740 | strong similarity to Gly-X carboxypeptidase precursor Yscs - <i>Saccharomyces cerevisiae</i> -                 | 0  | 578  | 1  | 2  | 5  | 0  | 1.6  | 1.7  | 0.01 |
| An09g02270 | strong similarity to triacylglycerol lipase lipI - <i>Geotrichum candidum</i>                                  | 0  | 592  | 1  | 2  | 3  | 2  | 1.5  | 1.7  | 0.01 |
| An03g00640 | similarity to neutral amino acid permease mtr - <i>Neurospora crassa</i>                                       | 11 | 599  | 1  | 2  | 3  | 2  | 1.5  | 1.7  | 0.01 |
| An06g00310 | similarity to carboxypeptidase D - <i>Penicillium janthinellum</i>                                             | 0  | 605  | 0  | 3  | 4  | 1  | 1.5  | 1.6  | 0.01 |
| An02g00210 | strong similarity to nonribosomal peptide synthase MxA - <i>Stigmatella aurantiaca</i>                         | 0  | 1276 | 14 | 12 | 26 | 10 | 5.4  | 5.2  | 0.01 |
| An14g03280 | strong similarity to dihydroxy-acid dehydratase Ilv3 - <i>Saccharomyces cerevisiae</i> -                       | 0  | 615  | 1  | 2  | 5  | 0  | 1.5  | 1.6  | 0.01 |
| An04g02850 | similarity to X-Pro dipeptidyl-peptidase IV - <i>Xanthomonas maltophilia</i> -                                 | 0  | 663  | 3  | 4  | 11 | 0  | 2.9  | 3.1  | 0.01 |

|            |                                                                                                                               |   |      |    |    |    |    |      |      |      |
|------------|-------------------------------------------------------------------------------------------------------------------------------|---|------|----|----|----|----|------|------|------|
| An09g01240 | strong similarity to phospholipase B - <i>Penicillium notatum</i>                                                             | 0 | 638  | 0  | 3  | 2  | 3  | 1.4  | 1.6  | 0.01 |
| An09g03940 | strong similarity to ketol-acid reductoisomerase ilv-2 - <i>Neurospora crassa</i>                                             | 0 | 401  | 12 | 19 | 25 | 21 | 20.4 | 20.9 | 0.01 |
| An04g00430 | strong similarity to branched-chain-amino-acid aminotransferase Bat2 - <i>Saccharomyces cerevisiae</i>                        | 0 | 412  | 1  | 4  | 6  | 1  | 3.5  | 3.3  | 0.01 |
| An15g04140 | strong similarity to polyketide synthase PKS1 - <i>Cochliobolus heterostrophus</i>                                            | 0 | 2565 | 21 | 4  | 20 | 14 | 2.6  | 2.4  | 0.01 |
| An14g04400 | strong similarity to succinate dehydrogenase iron-sulfur protein subunit Sdh2 - <i>Saccharomyces cerevisiae</i>               | 0 | 300  | 11 | 16 | 18 | 22 | 23.9 | 24.4 | 0.01 |
| An03g06360 | strong similarity to chitin synthase C chsC - <i>Aspergillus fumigatus</i>                                                    | 6 | 873  | 0  | 1  | 2  | 0  | 0.4  | 0.5  | 0.01 |
| An09g05480 | strong similarity to ubiquitin specific protease HAUSP - <i>Homo sapiens</i>                                                  | 0 | 1155 | 2  | 13 | 19 | 4  | 3.5  | 3.7  | 0.00 |
| An12g07580 | strong similarity to acetylglutamate kinase/N-acetyl- $\gamma$ -glutamyl-phosphate reductase arg-6 - <i>Neurospora crassa</i> | 0 | 903  | 1  | 2  | 0  | 5  | 1.0  | 1.1  | 0.00 |
| An08g09010 | strong similarity to spliceosomal protein SAPI30 - <i>Homo sapiens</i>                                                        | 0 | 1209 | 3  | 6  | 13 | 1  | 2.0  | 2.2  | 0.00 |
| An08g10650 | strong similarity to transport protein Sec24 - <i>Saccharomyces cerevisiae</i>                                                | 0 | 919  | 10 | 12 | 10 | 23 | 6.4  | 6.6  | 0.00 |
| An12g04020 | strong similarity to acetyl-CoA carboxylase SPAC56E4.04c - <i>Schizosaccharomyces pombe</i>                                   | 0 | 2283 | 46 | 16 | 54 | 33 | 7.1  | 6.9  | 0.00 |
| An01g03480 | strong similarity to sorbitol dehydrogenase gutB - <i>Bacillus subtilis</i>                                                   | 0 | 340  | 7  | 5  | 15 | 3  | 9.6  | 9.8  | 0.00 |
| An04g08430 | strong similarity to hypothetical protein AN1817.2 - <i>Aspergillus nidulans</i>                                              | 1 | 92   | 1  | 1  | 1  | 2  | 7.1  | 6.9  | 0.00 |
| An01g04600 | PDI related protein A prpA - <i>Aspergillus niger</i>                                                                         | 0 | 464  | 9  | 38 | 46 | 21 | 26.6 | 26.2 | 0.00 |
| An02g05400 | strong similarity to 146D nuclear protein - <i>Xenopus laevis</i>                                                             | 0 | 1206 | 3  | 0  | 4  | 1  | 0.8  | 0.8  | 0.00 |
| An08g06940 | strong similarity to histone H4.1 - <i>Aspergillus nidulans</i>                                                               | 0 | 103  | 1  | 1  | 1  | 2  | 6.3  | 6.1  | 0.00 |
| An04g02030 | strong similarity to ATP-dependent RNA helicase Ded1 - <i>Saccharomyces cerevisiae</i>                                        | 0 | 678  | 25 | 13 | 22 | 32 | 14.8 | 14.5 | 0.00 |
| An16g05930 | strong similarity to hypothetical protein EAA59446.1 - <i>Aspergillus nidulans</i>                                            | 0 | 300  | 5  | 9  | 10 | 10 | 12.6 | 12.3 | 0.00 |
| An07g07430 | strong similarity to cytoplasmic ribosomal protein of the large subunit L34.b - <i>Saccharomyces cerevisiae</i>               | 0 | 117  | 1  | 1  | 1  | 2  | 5.6  | 5.4  | 0.00 |
| An08g04480 | strong similarity to hypothetical protein B3E4.60 - <i>Neurospora crassa</i>                                                  | 2 | 858  | 28 | 38 | 54 | 40 | 20.2 | 19.9 | 0.00 |
| An16g08010 | strong similarity to Casein kinase CK II - <i>Arabidopsis thaliana</i>                                                        | 0 | 335  | 5  | 5  | 9  | 6  | 8.2  | 8.3  | 0.00 |
| An01g06670 | strong similarity to peptidyl-prolyl isomerase FKBP-21 - <i>Neurospora crassa</i>                                             | 0 | 135  | 1  | 1  | 2  | 1  | 4.8  | 4.7  | 0.00 |
| An01g01830 | strong similarity to catalase/peroxidase cpeB - <i>Streptomyces reticuli</i>                                                  | 0 | 762  | 32 | 36 | 89 | 8  | 23.4 | 23.1 | 0.00 |
| An13g00430 | similarity to pre-induction sporulation gene acoB - <i>Aspergillus nidulans</i>                                               | 0 | 375  | 3  | 11 | 10 | 10 | 10.1 | 9.9  | 0.00 |
| An03g05290 | similarity to glucan 1,3- $\beta$ -glucosidase Bgl2 - <i>Saccharomyces cerevisiae</i>                                         | 0 | 464  | 1  | 6  | 4  | 6  | 4.2  | 4.1  | 0.00 |
| An02g10200 | strong similarity to protein TRRAP - <i>Homo sapiens</i>                                                                      | 0 | 3911 | 2  | 1  | 2  | 2  | 0.2  | 0.2  | 0.00 |
| An08g08840 | strong similarity to glutamate decarboxylase GAD1 - <i>Arabidopsis thaliana</i>                                               | 0 | 515  | 6  | 4  | 11 | 4  | 5.3  | 5.4  | 0.00 |
| An01g12370 | similarity to hypothetical protein SPCC285.11 - <i>Schizosaccharomyces pombe</i>                                              | 0 | 525  | 2  | 8  | 8  | 7  | 5.2  | 5.3  | 0.00 |
| An02g06030 | strong similarity to urate oxidase uaz - <i>Aspergillus flavus</i>                                                            | 0 | 302  | 4  | 4  | 5  | 7  | 7.3  | 7.5  | 0.00 |
| An08g02470 | strong similarity to cytoplasmic ribosomal protein of the large subunit L35 - <i>Rattus norvegicus</i>                        | 0 | 121  | 2  | 4  | 5  | 4  | 14.0 | 14.2 | 0.00 |
| An02g05900 | similarity to hypothetical protein AA57718.1 - <i>Aspergillus nidulans</i>                                                    | 1 | 124  | 0  | 6  | 4  | 5  | 13.6 | 13.8 | 0.00 |
| An10g00480 | similarity to hypothetical GPI-anchor biosynthesis PIG-F related protein CAD70892.1 - <i>Neurospora crassa</i>                | 3 | 259  | 1  | 1  | 1  | 2  | 2.5  | 2.4  | 0.00 |
| An07g02820 | strong similarity to hypothetical protein SPBC1539.04 - <i>Schizosaccharomyces pombe</i>                                      | 3 | 287  | 8  | 20 | 28 | 13 | 25.8 | 26.1 | 0.00 |
| An04g05870 | strong similarity to E3 ubiquitin ligase Tom1 - <i>Saccharomyces cerevisiae</i>                                               | 0 | 4068 | 4  | 7  | 14 | 3  | 0.7  | 0.8  | 0.00 |
| An15g06260 | strong similarity to GU4 nucleic-binding protein 1 Arc1 - <i>Saccharomyces cerevisiae</i>                                     | 0 | 448  | 2  | 6  | 9  | 3  | 4.9  | 5.0  | 0.00 |
| 211875     | strong similarity to aldose 1-epimerase family protein, putative [ <i>Aspergillus clavatus</i> NRRL 1]                        | 0 | 398  | 4  | 12 | 11 | 12 | 10.8 | 10.7 | 0.00 |
| An04g05220 | strong similarity to subunit 6 of ubiquinol--cytochrome-c reductase Qcr6 - <i>Saccharomyces cerevisiae</i>                    | 0 | 167  | 3  | 3  | 5  | 4  | 10.1 | 10.3 | 0.00 |
| An14g02990 | similarity to hypothetical protein KIAA1715 - <i>Homo sapiens</i>                                                             | 2 | 430  | 1  | 1  | 2  | 1  | 1.5  | 1.5  | 0.00 |
| An04g02090 | pyruvate carboxylase pyc - <i>Aspergillus niger</i>                                                                           | 0 | 1192 | 53 | 37 | 80 | 49 | 19.8 | 19.6 | 0.00 |
| An02g05210 | strong similarity to synexin (annexin VII) - <i>Mus musculus</i>                                                              | 0 | 449  | 2  | 0  | 1  | 2  | 1.4  | 1.4  | 0.00 |

|            |                                                                                                       |    |      |    |    |     |    |      |      |      |
|------------|-------------------------------------------------------------------------------------------------------|----|------|----|----|-----|----|------|------|------|
| An11g09880 | similarity to hypothetical protein CAE76201.1 - Neurospora crassa                                     | 1  | 235  | 2  | 4  | 5   | 4  | 7.2  | 7.3  | 0.00 |
| An17g01815 | strong similarity to translation initiation factor Eif6 - Saccharomyces cerevisiae                    | 0  | 247  | 3  | 3  | 6   | 3  | 6.8  | 6.9  | 0.00 |
| An01g06480 | strong similarity to TCP1 complex $\beta$ chain TCP1 $\beta$ - Saccharomyces cerevisiae               | 0  | 531  | 2  | 0  | 1   | 2  | 1.2  | 1.2  | 0.00 |
| An02g05700 | strong similarity to translation elongation factor eEF-2 - Cricetus griseus                           | 0  | 844  | 62 | 57 | 123 | 48 | 36.8 | 36.7 | 0.00 |
| An15g00570 | strong similarity to bifunctional purine synthase ade1p - Schizosaccharomyces pombe-                  | 0  | 808  | 4  | 4  | 12  | 0  | 2.7  | 2.8  | 0.00 |
| An17g00240 | strong similarity to hypothetical protein YER036c - Saccharomyces cerevisiae                          | 0  | 613  | 2  | 0  | 1   | 2  | 1.1  | 1.0  | 0.00 |
| An08g05160 | strong similarity to oleate $\delta$ -12 desaturase odeA - Aspergillus nidulans                       | 4  | 466  | 9  | 16 | 15  | 21 | 14.2 | 14.1 | 0.00 |
| An02g10350 | strong similarity to farnesyl-pyrophosphate synthase FPPS - Gibberella fujikuroi-                     | 0  | 346  | 2  | 4  | 9   | 0  | 4.9  | 5.0  | 0.00 |
| An17g01550 | strong similarity to Na <sup>+</sup> -H <sup>+</sup> antiporter Nha2 - Saccharomyces cerevisiae       | 12 | 707  | 0  | 2  | 1   | 2  | 0.9  | 0.9  | 0.00 |
| An07g07420 | strong similarity to splicing factor PRP8 - Homo sapiens                                              | 0  | 2407 | 9  | 1  | 3   | 12 | 1.1  | 1.2  | 0.00 |
| 211733     | strong similarity to PX domain protein [Aspergillus fumigatus Af293]                                  | 1  | 1024 | 2  | 0  | 1   | 2  | 0.6  | 0.6  | 0.00 |
| An16g03090 | strong similarity to small nucleolar RNP component Nop56 - Saccharomyces cerevisiae                   | 0  | 519  | 2  | 4  | 7   | 2  | 3.3  | 3.3  | 0.00 |
| An16g09260 | strong similarity to dnaK-type molecular chaperone Ssb2 - Saccharomyces cerevisiae                    | 0  | 614  | 11 | 15 | 21  | 17 | 11.2 | 11.3 | 0.00 |
| An18g03290 | strong similarity to regulator subunit of the protein phosphatase 2A PR65 - Xenopus laevis            | 0  | 616  | 4  | 2  | 8   | 1  | 2.7  | 2.8  | 0.00 |
| An05g00530 | strong similarity to translational regulator HsGCN1 - Homo sapiens                                    | 0  | 2589 | 8  | 0  | 10  | 2  | 0.9  | 0.9  | 0.00 |
| An08g06560 | strong similarity to spermidine synthase Spe3 - Saccharomyces cerevisiae                              | 0  | 292  | 5  | 6  | 15  | 1  | 10.2 | 10.2 | 0.00 |
| An14g03820 | strong similarity to UDP-glucose 4-epimerase Gal10 - Saccharomyces cerevisiae                         | 0  | 371  | 7  | 6  | 10  | 9  | 9.5  | 9.5  | 0.00 |
| An17g01110 | strong similarity to 17.2 kD subunit of NADH:ubiquinone reductase b17.2 - Bos taurus                  | 0  | 140  | 1  | 3  | 2   | 4  | 8.4  | 8.4  | 0.00 |
| An16g01570 | strong similarity to Arp2/3 complex 21kDa subunit ARC21 - Homo sapiens                                | 0  | 188  | 3  | 1  | 2   | 4  | 6.2  | 6.2  | 0.00 |
| An02g07090 | strong similarity to ASNA1 product arsenite translocating ATPase - Homo sapiens-                      | 0  | 341  | 3  | 1  | 6   | 0  | 3.4  | 3.4  | 0.00 |
| An18g05090 | similarity to retinal short-chain dehydrogenase/reductase retSDR1 - Mus musculus                      | 3  | 387  | 1  | 3  | 2   | 4  | 3.0  | 3.0  | 0.00 |
| An07g05830 | strong similarity to formamidase fmdS - Aspergillus nidulans-                                         | 0  | 413  | 2  | 2  | 6   | 0  | 2.8  | 2.8  | 0.00 |
| An12g10590 | strong similarity to hypothetical protein EAU36877, a novel DnaK-type chaperone - Aspergillus terreus | 0  | 489  | 2  | 2  | 4   | 2  | 2.4  | 2.4  | 0.00 |
| An04g02500 | strong similarity to glycolipid N-tetradecanoyltransferase Nmt - Ajellomyces capsulatus               | 0  | 491  | 3  | 1  | 2   | 4  | 2.4  | 2.4  | 0.00 |
| An16g01030 | strong similarity to phenylacetate hydroxylase pahA - Penicillium chrysogenum                         | 0  | 516  | 4  | 0  | 3   | 3  | 2.3  | 2.3  | 0.00 |
| An15g06360 | similarity to multifunctional glutamine-proline--tRNA ligase Aats-glupro - Drosophila melanogaster    | 0  | 604  | 4  | 0  | 5   | 1  | 1.9  | 1.9  | 0.00 |
