# Supplementary material
Source: PubMed Central journal article supplement (PMC2897441)
Supplement: supp_76_13_4421__3.pdf [file supp_76_13_4421__3.pdf]

**SUPPLEMENTAL TABLE S3.** Proteins from non-secretory organelles. NSAF normalized spectral abundance factor; SpC: spectral counts, Sorb: sorbitol addition; X: xylose addition. Blue cells: proteins over-represented on sorbitol; orange cells: proteins over-represented on xylose.

| A. niger Locus | Description                                                                                         | SpC  |     | NSAF.10 <sup>4</sup> |      |
|----------------|-----------------------------------------------------------------------------------------------------|------|-----|----------------------|------|
|                |                                                                                                     | Sorb | Xyl | Sorb                 | Xyl  |
| <b>NUCLEAR</b> |                                                                                                     |      |     |                      |      |
| An06g01440     | similarity to heterogeneous nuclear ribonucleoprotein (hnRNP) Tom34 - Saccharomyces cerevisiae      | 29   | 27  | 22.9                 | 14.8 |
| An11g11310     | strong similarity to histone H2B - Aspergillus nidulans                                             | 9    | 11  | 17.5                 | 14.7 |
| An03g06670     | weak similarity to myosin-like protein Mlp1 - Saccharomyces cerevisiae                              | 122  | 248 | 15.3                 | 21.6 |
| An07g05820     | strong similarity to hypothetical transmembrane protein usgS - Aspergillus nidulans                 | 14   | 26  | 10.3                 | 13.1 |
| An15g06440     | strong similarity to karyopherin alpha Srp1 - Saccharomyces cerevisiae                              | 21   | 17  | 10.2                 | 5.8  |
| An16g01870     | strong similarity to mRNA cleavage factor I 25 kDa subunit CFIM25 - Homo sapiens                    | 8    | 7   | 8.0                  | 4.9  |
| An08g10060     | strong similarity to small G-protein Gsp1 - Candida albicans                                        | 6    | 10  | 7.9                  | 8.9  |
| An15g00170     | strong similarity to protein kinase skp1p - Schizosaccharomyces pombe                               | 11   | 11  | 7.6                  | 5.3  |
| An08g06940     | strong similarity to histone H4.1 - Aspergillus nidulans                                            | 2    | 3   | 6.3                  | 6.1  |
| An07g02990     | similarity to RNA-binding protein AUF1 - Homo sapiens                                               | 7    | 13  | 6.2                  | 7.7  |
| An14g04940     | strong similarity to mRNA turnover 4 protein Mrt4 - Saccharomyces cerevisiae                        | 5    | 8   | 6.1                  | 6.6  |
| An11g11140     | strong similarity to nuclear pore membrane protein Pom152 - Saccharomyces cerevisiae                | 28   | 48  | 5.9                  | 7.0  |
| An12g07790     | strong similarity to transcription factor btf3p - Schizosaccharomyces pombe-                        | 3    | 2   | 5.9                  | 2.9  |
| An12g08030     | strong similarity to NADH oxidoreductase complex I subunit Sub2 - Saccharomyces cerevisiae          | 9    | 12  | 5.6                  | 5.1  |
| An07g02690     | similarity to hypothetical regulational protein PBK1 - Homo sapiens-                                | 8    | 4   | 5.4                  | 2.0  |
| An01g12230     | strong similarity to nucleolar protein Nop1 - Saccharomyces cerevisiae                              | 6    | 18  | 5.4                  | 10.7 |
| An14g00100     | strong similarity to nucleoporin-interacting protein Nic96 - Saccharomyces cerevisiae               | 20   | 10  | 5.4                  | 1.9  |
| 56745          | strong similarity to pre-mRNA splicing factor (Srp1), putative [Neosartorya fischeri NRRL 181]      | 4    | 7   | 5.3                  | 6.1  |
| An07g01520     | strong similarity to nucleoporin Nup170 - Saccharomyces cerevisiae                                  | 25   | 11  | 4.9                  | 1.5  |
| An12g00410     | strong similarity to RNA binding protein 47 RBP47 - Nicotiana plumbaginifolia                       | 7    | 6   | 4.9                  | 2.9  |
| An01g06040     | strong similarity to hypothetical membrane protein YOL077c - Saccharomyces cerevisiae               | 6    | 6   | 4.7                  | 3.3  |
| An16g01810     | strong similarity to histone H2A variant pht1p - Schizosaccharomyces pombe-                         | 2    | 1   | 4.7                  | 2.0  |
| An14g02360     | strong similarity to U2 snRNA-specific protein A - Homo sapiens                                     | 4    | 4   | 4.6                  | 3.2  |
| An01g14070     | strong similarity to karyopherin $\beta$ Kap95 - Saccharomyces cerevisiae-                          | 15   | 19  | 4.6                  | 4.0  |
| An04g01520     | similarity to nuclear envelope protein cut11p - Schizosaccharomyces pombe                           | 9    | 6   | 4.4                  | 2.1  |
| An09g00500     | weak similarity to transcription factor Arg81 - Saccharomyces cerevisiae                            | 13   | 16  | 4.0                  | 3.4  |
| An02g08100     | strong similarity to translin-like protein TRAX - Gallus gallus-                                    | 3    | 2   | 3.9                  | 1.9  |
| An02g09260     | strong similarity to nucleolar protein Nop5 - Saccharomyces cerevisiae                              | 8    | 11  | 3.8                  | 3.6  |
| An15g00140     | similarity to transcription repressor Tup1 - Saccharomyces cerevisiae-                              | 8    | 4   | 3.8                  | 1.4  |
| An08g00520     | strong similarity to protein sonA - Aspergillus nidulans                                            | 4    | 4   | 3.3                  | 2.3  |
| An16g03090     | strong similarity to small nucleolar RNP component Nop56 - Saccharomyces cerevisiae                 | 6    | 9   | 3.3                  | 3.3  |
| An07g03430     | strong similarity to hypothetical protein CAD70902.1 - Neurospora crassa                            | 3    | 4   | 3.1                  | 2.8  |
| An17g02170     | strong similarity to centromere/microtubule-binding protein Cbf5 - Saccharomyces cerevisiae         | 5    | 11  | 3.0                  | 4.3  |
| An15g00160     | strong similarity to transcription regulator CaGCR3 - Candida albicans-                             | 8    | 17  | 2.6                  | 3.7  |
| An02g03860     | strong similarity to hypothetical protein B1D1.160 - Neurospora crassa-                             | 12   | 9   | 2.6                  | 1.4  |
| An07g06730     | strong similarity to cut3p - Schizosaccharomyces pombe-                                             | 12   | 3   | 2.5                  | 0.5  |
| An11g01510     | similarity to the protein involved in sister chromatid segregation Src1 - Saccharomyces cerevisiae  | 6    | 3   | 2.3                  | 0.9  |
| An07g09830     | strong similarity to hypothetical protein encoded by B19C19.110 - Neurospora crassa                 | 4    | 5   | 2.3                  | 1.9  |
| An18g01170     | strong similarity to poly(ADP-ribose) polymerase NAP protein from patent WO200004173-A1 - Zea mays- | 5    | 0   | 2.2                  | 0.1  |
| An02g12640     | strong similarity to RNA-binding protein 30 - Nicotiana plumbaginifolia-                            | 4    | 7   | 2.2                  | 2.5  |
| An08g09010     | strong similarity to spliceosomal protein SAP130 - Homo sapiens                                     | 9    | 14  | 2.0                  | 2.2  |

|                      |                                                                                                                          |     |     |      |       |
|----------------------|--------------------------------------------------------------------------------------------------------------------------|-----|-----|------|-------|
| An02g03940           | strong similarity to glucose repression mediator protein Ssn6 - <i>Saccharomyces cerevisiae</i> -                        | 6   | 1   | 2.0  | 0.3   |
| An02g14750           | strong similarity to actin-related protein - <i>Homo sapiens</i>                                                         | 3   | 3   | 1.9  | 1.3   |
| An16g05050           | similarity to importin RanBP7 - <i>Homo sapiens</i>                                                                      | 7   | 6   | 1.9  | 1.1   |
| An04g02130           | similarity to U1 and U2 snRNPs component Smb - <i>Homo sapiens</i>                                                       | 1   | 4   | 1.8  | 3.7   |
| An02g03520           | strong similarity to G protein-binding protein CRFG - <i>Homo sapiens</i>                                                | 3   | 9   | 1.4  | 2.6   |
| An01g00150           | strong similarity to nuclear protein Enp1 - <i>Saccharomyces cerevisiae</i>                                              | 2   | 5   | 1.3  | 2.0   |
| An08g07050           | strong similarity to 189 kD subunit of DNA-directed RNA polymerase I rpa190p - <i>Schizosaccharomyces pombe</i>          | 8   | 10  | 1.3  | 1.1   |
| An15g01240           | strong similarity to protein required for accurate mitotic chromosome segregation Cse1 - <i>Saccharomyces cerevisiae</i> | 4   | 23  | 1.2  | 4.4   |
| An16g09200           | strong similarity to U5 snRNP-specific protein U5-116kD - <i>Mus musculus</i>                                            | 4   | 9   | 1.2  | 1.7   |
| An07g07420           | strong similarity to splicing factor PRP8 - <i>Homo sapiens</i>                                                          | 10  | 15  | 1.1  | 1.2   |
| An18g02480           | strong similarity to DNA repair protein XAB2 - <i>Homo sapiens</i> -                                                     | 3   | 1   | 1.1  | 0.3   |
| An11g04870           | strong similarity to ribonucleoprotein autoantigen Sm-D - <i>Homo sapiens</i>                                            | 0   | 4   | 1.1  | 6.7   |
| An14g06530           | similarity to nucleoporin Nup192 - <i>Saccharomyces cerevisiae</i> -                                                     | 5   | 3   | 0.8  | 0.4   |
| An02g05400           | strong similarity to 146D nuclear protein - <i>Xenopus laevis</i>                                                        | 3   | 5   | 0.8  | 0.8   |
| An04g05870           | strong similarity to E3 ubiquitin ligase Tom1 - <i>Saccharomyces cerevisiae</i>                                          | 11  | 17  | 0.7  | 0.8   |
| An04g05630           | similarity to nuclear pore complex subunit Nup100 - <i>Saccharomyces cerevisiae</i> -                                    | 5   | 1   | 0.7  | 0.1   |
| An04g02640           | strong similarity to protein pescadillo - <i>Homo sapiens</i>                                                            | 1   | 11  | 0.6  | 3.1   |
| An15g06390           | strong similarity to ribosomal RNA processing protein Rrp5 - <i>Saccharomyces cerevisiae</i>                             | 3   | 13  | 0.5  | 1.3   |
| An07g10400           | strong similarity to cell division control protein Cdc68 - <i>Saccharomyces cerevisiae</i>                               | 1   | 5   | 0.4  | 1.0   |
| An02g10200           | strong similarity to protein TRRAP - <i>Homo sapiens</i>                                                                 | 3   | 4   | 0.2  | 0.2   |
| An08g06090           | similarity to nucleoporin nup184p - <i>Schizosaccharomyces pombe</i>                                                     | 1   | 6   | 0.2  | 0.6   |
| An11g01770           | strong similarity to 135 kD subunit of DNA-directed RNA polymerase I - <i>Neurospora crassa</i>                          | 0   | 8   | 0.1  | 1.3   |
| An12g00720           | strong similarity to 138 kD subunit of DNA-dependent RNA polymerase II rpb2p - <i>Schizosaccharomyces pombe</i>          | 0   | 4   | 0.1  | 0.6   |
| An16g07120           | strong similarity to regulator protein Sin3 - <i>Saccharomyces cerevisiae</i>                                            | 0   | 3   | 0.1  | 0.4   |
| An17g00540           | similarity to suppressor of <i>S.cerevisiae</i> sin4 mutation Rlr1 - <i>Saccharomyces cerevisiae</i>                     | 0   | 5   | 0.1  | 0.4   |
| <b>MITOCHONDRIAL</b> |                                                                                                                          |     |     |      |       |
| An18g04220           | strong similarity to mitochondrial ADP/ATP carrier anc1p - <i>Schizosaccharomyces pombe</i>                              | 114 | 207 | 93.4 | 117.3 |
| An14g04180           | strong similarity to H <sup>+</sup> -transporting ATP synthase $\beta$ chain - <i>Neurospora crassa</i> [truncated ORF]  | 141 | 219 | 88.3 | 95.0  |
| An01g13600           | strong similarity to mitochondrial phosphate transport protein Mir1 - <i>Saccharomyces cerevisiae</i>                    | 56  | 116 | 46.8 | 66.9  |
| An09g06650           | strong similarity to core protein II of ubiquinol--cytochrome c reductase CAA42214.1 - <i>Bos primigenius taurus</i>     | 80  | 103 | 45.7 | 40.8  |
| An04g04060           | strong similarity to cytochrome-c peroxidase precursor Ccp1 - <i>Saccharomyces cerevisiae</i>                            | 63  | 67  | 45.4 | 33.5  |
| An07g06840           | strong similarity to precursor of dihydrolipoamide dehydrogenase Lpd1 - <i>Saccharomyces cerevisiae</i>                  | 67  | 84  | 34.2 | 29.7  |
| An16g07410           | strong similarity to mitochondrial F1-ATPase alpha-subunit Atp1 - <i>Saccharomyces cerevisiae</i>                        | 68  | 136 | 32.1 | 44.3  |
| An09g05870           | strong similarity to nucleoside-diphosphate kinase NDK-1 - <i>Neurospora crassa</i>                                      | 18  | 25  | 31.5 | 30.1  |
| An02g01830           | cytochrome c cyc - <i>Aspergillus niger</i>                                                                              | 13  | 16  | 31.4 | 26.6  |
| 203715               | strong similarity to outer mitochondrial membrane protein porin [ <i>Aspergillus clavatus</i> NRRL 1]                    | 41  | 76  | 30.9 | 39.4  |
| An07g02180           | strong similarity to dihydrolipoamide acetyltransferase Lat1 - <i>Saccharomyces cerevisiae</i>                           | 78  | 58  | 30.3 | 15.6  |
| An12g04940           | strong similarity to mitochondrial heat shock protein Hsp60 - <i>Saccharomyces cerevisiae</i>                            | 60  | 146 | 26.8 | 45.0  |
| An02g11910           | similarity to mitochondrial pyruvate dehydrogenase complex protein Pdx1 - <i>Saccharomyces cerevisiae</i>                | 28  | 22  | 25.7 | 14.0  |
| An14g04400           | strong similarity to succinate dehydrogenase iron-sulfur protein subunit Sdh2 - <i>Saccharomyces cerevisiae</i>          | 27  | 40  | 23.9 | 24.4  |
| An01g00100           | strong similarity to pyruvate dehydrogenase $\beta$ chain precursor Pdb1 - <i>Saccharomyces cerevisiae</i>               | 32  | 32  | 22.6 | 15.7  |
| An02g12770           | strong similarity to succinate dehydrogenase Sdh1 - <i>Saccharomyces cerevisiae</i>                                      | 54  | 123 | 22.0 | 34.5  |
| An07g02160           | strong similarity to mitochondrial malate dehydrogenase Mdh1 - <i>Saccharomyces cerevisiae</i>                           | 28  | 55  | 21.8 | 29.4  |
| An15g01710           | strong similarity to F1Fo-ATP synthase subunit 7 ATP7 - <i>Kluyveromyces lactis</i>                                      | 14  | 38  | 21.8 | 40.1  |
| An09g06680           | citrate synthase citA - <i>Aspergillus niger</i>                                                                         | 38  | 57  | 21.1 | 21.9  |

|            |                                                                                                                             |    |     |      |      |
|------------|-----------------------------------------------------------------------------------------------------------------------------|----|-----|------|------|
| An08g07360 | strong similarity to mitochondrial import receptor TOM20 - <i>Neurospora crassa</i>                                         | 13 | 15  | 21.0 | 16.7 |
| An02g09930 | strong similarity to subunit VI of cytochrome c oxidase Cox6 - <i>Saccharomyces cerevisiae</i>                              | 12 | 16  | 20.6 | 18.8 |
| An09g03940 | strong similarity to ketol-acid reductoisomerase ilv-2 - <i>Neurospora crassa</i>                                           | 31 | 46  | 20.4 | 20.9 |
| An16g07290 | strong similarity to F1Fo-ATP synthase subunit 4 ATP4 - <i>Kluyveromyces lactis</i>                                         | 17 | 40  | 18.7 | 29.9 |
| An01g06180 | strong similarity to cytochrome c1 of ubiquinol--cytochrome c reductase CYT-1 - <i>Neurospora crassa</i>                    | 22 | 64  | 18.5 | 36.8 |
| An16g08550 | strong similarity to ATP synthase coupling factor (F0) subunit e Tim11 - <i>Saccharomyces cerevisiae</i>                    | 6  | 11  | 18.4 | 22.5 |
| An11g09390 | strong similarity to 21 kD subunit of NADH:ubiquinone reductase nuo-21 - <i>Neurospora crassa</i>                           | 14 | 33  | 17.2 | 27.6 |
| An09g06850 | strong similarity to 78 kD subunit of NADH:ubiquinone reductase NDUFS1 - <i>Bos taurus</i>                                  | 48 | 132 | 17.1 | 32.4 |
| An14g04080 | strong similarity to iron-sulfur subunit of ubiquinol--cytochrome c reductase rip1p - <i>Schizosaccharomyces pombe</i>      | 15 | 44  | 16.9 | 33.7 |
| An01g03570 | strong similarity to cytochrome-b5 reductase Mcr1 - <i>Saccharomyces cerevisiae</i>                                         | 20 | 64  | 16.6 | 36.1 |
| An15g00190 | strong similarity to mitochondrial import receptor MOM38 - <i>Neurospora crassa</i>                                         | 22 | 47  | 16.5 | 24.2 |
| An11g10200 | strong similarity to subunit VIa of cytochrome c oxidase Cox13 - <i>Saccharomyces cerevisiae</i>                            | 8  | 13  | 15.7 | 17.3 |
| An08g10690 | strong similarity to 40 kD subunit of NADH-ubiquinone reductase NUO-40 - <i>Neurospora crassa</i>                           | 21 | 54  | 15.0 | 26.4 |
| An08g00210 | strong similarity to glycerol-3-phosphate dehydrogenase gdm1 - <i>Mus musculus</i>                                          | 40 | 82  | 15.0 | 21.1 |
| An02g05470 | strong similarity to 49 kD subunit of NADH:ubiquinone reductase - <i>Neurospora crassa</i>                                  | 26 | 56  | 14.5 | 21.4 |
| An08g04070 | strong similarity to mitochondrial receptor complex chain MOM22 - <i>Neurospora crassa</i>                                  | 8  | 8   | 14.5 | 10.0 |
| An01g12210 | strong similarity to core protein I of ubiquinol--cytochrome-c reductase $\beta$ -MPP - <i>Neurospora crassa</i>            | 25 | 98  | 13.9 | 37.1 |
| An14g04170 | cytochrome c oxidase subunit V cox5 - <i>Aspergillus niger</i>                                                              | 10 | 26  | 13.8 | 24.1 |
| An15g00690 | strong similarity to 14.8 kD subunit of NADH:ubiquinone reductase - <i>Neurospora crassa</i>                                | 6  | 11  | 13.8 | 16.9 |
| An02g05900 | similarity to hypothetical protein AA57718.1 - <i>Aspergillus nidulans</i>                                                  | 6  | 9   | 13.6 | 13.8 |
| An14g00220 | strong similarity to hypothetical protein SPAC17C9.06 - <i>Schizosaccharomyces pombe</i>                                    | 26 | 44  | 13.4 | 15.6 |
| An08g05580 | strong similarity to precursor of isocitrate dehydrogenase (NAD <sup>+</sup> ) chain Idh2 - <i>Saccharomyces cerevisiae</i> | 22 | 22  | 13.4 | 9.3  |
| An06g01390 | strong similarity to 21.3 kD subunit of NADH:ubiquinone reductase - <i>Neurospora crassa</i>                                | 9  | 26  | 12.7 | 24.5 |
| An16g05090 | strong similarity to endonuclease SceI 75 kDa subunit Ens1 - <i>Saccharomyces cerevisiae</i>                                | 30 | 39  | 11.9 | 10.7 |
| An08g06540 | strong similarity to antiproliferative protein prohibitin Phb1 - <i>Saccharomyces cerevisiae</i>                            | 12 | 36  | 11.7 | 23.6 |
| An11g06200 | strong similarity to 31 kD subunit of NADH:ubiquinone reductase - <i>Neurospora crassa</i>                                  | 12 | 30  | 11.6 | 19.6 |
| An02g05880 | strong similarity to 29.9 kD subunit of NADH:ubiquinone reductase - <i>Neurospora crassa</i>                                | 10 | 25  | 11.5 | 19.4 |
| An07g09530 | strong similarity to alpha subunit E1 of the pyruvate dehydrogenase complex Pda1 - <i>Saccharomyces cerevisiae</i>          | 17 | 14  | 11.3 | 6.5  |
| An12g04750 | strong similarity to prohibitin Phb2 - <i>Saccharomyces cerevisiae</i>                                                      | 12 | 33  | 10.6 | 19.7 |
| An14g00060 | strong similarity to 20.9 kD subunit of NADH:ubiquinone reductase - <i>Neurospora crassa</i>                                | 7  | 19  | 10.4 | 18.7 |
| An04g05220 | strong similarity to subunit 6 of ubiquinol--cytochrome-c reductase Qcr6 - <i>Saccharomyces cerevisiae</i>                  | 6  | 9   | 10.1 | 10.3 |
| An07g07390 | strong similarity to subunit IV of cytochrome c oxidase Cox4 - <i>Saccharomyces cerevisiae</i>                              | 7  | 29  | 10.1 | 27.4 |
| An02g04520 | strong similarity to H <sup>+</sup> -transporting ATP synthase delta chain precursor Atp5 - <i>Saccharomyces cerevisiae</i> | 8  | 20  | 9.7  | 16.2 |
| An03g03900 | similarity to single-stranded DNA-binding protein Rim1 - <i>Saccharomyces cerevisiae</i>                                    | 5  | 5   | 9.7  | 6.7  |
| An01g03480 | strong similarity to sorbitol dehydrogenase gutB - <i>Bacillus subtilis</i>                                                 | 12 | 18  | 9.6  | 9.8  |
| An07g03070 | strong similarity to mitochondrial carrier protein ARALAR2 - <i>Homo sapiens</i>                                            | 25 | 96  | 9.5  | 25.0 |
| An12g00220 | strong similarity to hypothetical protein EAA61911.1 - <i>Aspergillus nidulans</i>                                          | 5  | 6   | 9.3  | 7.6  |
| An03g04790 | strong similarity to mitochondrial outer membrane protein Tom70 - <i>Podospira anserina</i>                                 | 21 | 63  | 8.9  | 18.2 |
| An08g04470 | strong similarity to mitochondrial elongation factor Tu - <i>Arabidopsis thaliana</i>                                       | 14 | 16  | 8.6  | 6.8  |
| An01g10880 | similarity to F1Fo-ATP synthase subunit g homolog Atp20 - <i>Saccharomyces cerevisiae</i>                                   | 6  | 18  | 8.5  | 16.9 |
| An17g01110 | strong similarity to 17.2 kD subunit of NADH:ubiquinone reductase b17.2 - <i>Bos taurus</i>                                 | 4  | 6   | 8.4  | 8.4  |
| An17g01670 | strong similarity to succinyl coenzyme A synthase alpha subunit SYRTSA - <i>Rattus norvegicus</i>                           | 10 | 9   | 8.2  | 5.2  |
| An07g10010 | strong similarity to mitochondrial carrier protein Yhm1 - <i>Saccharomyces cerevisiae</i>                                   | 9  | 37  | 8.0  | 21.9 |
| An14g02250 | strong similarity to flavocytochrome b2 L-lactate dehydrogenase CYB2 - <i>Pichia anomala</i>                                | 14 | 8   | 7.5  | 3.1  |
| An18g01590 | strong similarity to carnitine O-acetyltransferase cat2 - <i>Candida tropicalis</i>                                         | 18 | 10  | 7.5  | 2.9  |
| An12g04780 | strong similarity to 24 kD subunit of NADH:ubiquinone reductase Nuo24 - <i>Neurospora crassa</i>                            | 7  | 18  | 7.3  | 12.4 |
| An08g01370 | strong similarity to Oxodicarboxylate carrier Odc2 - <i>Saccharomyces cerevisiae</i>                                        | 8  | 24  | 7.3  | 14.5 |
| An15g01780 | strong similarity to 2-methylcitrate dehydratase PrpD - <i>Salmonella typhimurium</i>                                       | 13 | 9   | 7.0  | 3.4  |

|            |                                                                                                                                            |    |    |     |      |
|------------|--------------------------------------------------------------------------------------------------------------------------------------------|----|----|-----|------|
| An04g02460 | strong similarity to heart muscle protein mitofilin HMP - Homo sapiens                                                                     | 16 | 59 | 6.8 | 17.0 |
| An13g00670 | strong similarity to mitochondrial protein Mia1 - Saccharomyces cerevisiae-                                                                | 3  | 2  | 6.7 | 3.3  |
| An18g05890 | similarity to pyruvate dehydrogenase phosphatase isoenzyme 1 PDP1 - Rattus norvegicus                                                      | 15 | 24 | 6.7 | 7.3  |
| An04g05640 | mitochondrial proton-pumping NADH:ubiquinone reductase nuo51 - Aspergillus niger                                                           | 12 | 67 | 6.6 | 24.5 |
| An07g09920 | strong similarity to NADH-dependent glutamate synthase NADH-GOGAT - Medicago sativa                                                        | 50 | 76 | 6.2 | 6.5  |
| An04g04750 | strong similarity to oxoglutarate dehydrogenase (lipoamide) Kgd1 - Saccharomyces cerevisiae                                                | 24 | 71 | 6.0 | 12.2 |
| An02g12430 | precursor of mitochondrial isocitrate dehydrogenase icdA - Aspergillus niger                                                               | 9  | 10 | 6.0 | 4.6  |
| An15g01920 | strong similarity to methylcitrate synthase mcsA - Aspergillus nidulans                                                                    | 10 | 6  | 5.9 | 2.5  |
| An08g04910 | strong similarity to 22 kD subunit NADH:ubiquinone reductase - Neurospora crassa                                                           | 3  | 5  | 5.7 | 6.2  |
| An03g03640 | strong similarity to mitochondrial sulfide dehydrogenase (coenzyme Q2) SPBC2G5.06c - Schizosaccharomyces pombe [putative sequencing error] | 11 | 27 | 5.7 | 9.4  |
| An09g06670 | strong similarity to suppressor gene of mitochondrial histone Yhm2 - Saccharomyces cerevisiae                                              | 6  | 30 | 5.4 | 17.4 |
| An01g09840 | strong similarity to hypothetical protein AN0630.2 - Aspergillus nidulans                                                                  | 1  | 5  | 5.3 | 13.4 |
| An18g05670 | strong similarity to 23 kD subunit of NADH:ubiquinone reductase - Bos taurus                                                               | 4  | 14 | 5.2 | 11.7 |
| An04g00110 | strong similarity to 21/29 kD subunit of NADH:ubiquinone reductase - Neurospora crassa                                                     | 5  | 17 | 5.1 | 11.3 |
| An03g04660 | weak similarity to hypothetical protein YGR165w - Saccharomyces cerevisiae-                                                                | 7  | 11 | 5.0 | 5.4  |
| An01g04630 | strong similarity to gamma chain precursor of the H <sup>+</sup> -transporting ATP synthase Atp3 - Saccharomyces cerevisiae                | 5  | 14 | 4.8 | 8.8  |
| An02g07320 | strong similarity to AU-specific RNA-binding protein / enoyl-CoA hydratase AUH - Homo sapiens-                                             | 5  | 3  | 4.7 | 2.1  |
| An11g11280 | strong similarity to dihydrolipoamide succinyltransferase kgd2 - Aspergillus fumigatus                                                     | 8  | 19 | 4.7 | 7.5  |
| An11g05700 | similarity to hypothetical membrane protein YGR235c - Saccharomyces cerevisiae                                                             | 4  | 11 | 4.6 | 8.2  |
| An18g02990 | similarity to mitochondrial ribosomal protein Mrp20 - Saccharomyces cerevisiae-                                                            | 3  | 3  | 4.6 | 3.2  |
| An16g07110 | strong similarity to acetyl-CoA hydrolase Ach1 - Saccharomyces cerevisiae                                                                  | 8  | 9  | 4.2 | 3.3  |
| An08g01590 | similarity to membrane associated protein SLP-2 - Homo sapiens                                                                             | 6  | 24 | 3.9 | 10.1 |
| An08g05500 | strong similarity to mitochondrial ribosomal protein of the large subunit Yml3 - Saccharomyces cerevisiae                                  | 5  | 5  | 3.9 | 2.7  |
| An02g07600 | strong similarity to succinate dehydrogenase Sdh1 - Saccharomyces cerevisiae                                                               | 9  | 11 | 3.8 | 3.2  |
| An03g03360 | strong similarity to carnitine/acyl carnitine carrier acuH - Aspergillus nidulans                                                          | 4  | 16 | 3.6 | 9.2  |
| An16g02130 | similarity to novel cell death-regulatory protein GRIM19 - Mus musculus                                                                    | 1  | 12 | 3.6 | 20.7 |
| An12g04110 | strong similarity to precursor of mitochondrial nuclease Nuc1 - Saccharomyces cerevisiae                                                   | 4  | 14 | 3.5 | 7.8  |
| An08g04880 | strong similarity to hypothetical protein CAD27304.1 - Aspergillus fumigatus                                                               | 3  | 9  | 3.5 | 6.5  |
| An04g01200 | strong similarity to 14 kD subunit of ubiquinol--cytochrome c reductase Qcr7 - Saccharomyces cerevisiae                                    | 1  | 5  | 3.2 | 8.1  |
| An08g10530 | strong similarity to mitochondrial aconitate hydratase Aco1 - Saccharomyces cerevisiae                                                     | 9  | 56 | 3.2 | 13.1 |
| An02g11200 | similarity to 13 kD subunit of NADH:ubiquinone reductase - Bos taurus                                                                      | 3  | 7  | 3.1 | 4.6  |
| An18g06760 | strong similarity to NAD(+)-isocitrate dehydrogenase subunit I idh1 - Ajellomyces capsulatus                                               | 4  | 4  | 3.0 | 2.1  |
| An13g03940 | strong similarity to long-chain-acyl-CoA dehydrogenase precursor LCAD - Rattus norvegicus                                                  | 4  | 5  | 2.8 | 2.4  |
| An01g03110 | similarity to ribosomal protein of the small subunit Rsm7 - Saccharomyces cerevisiae-                                                      | 4  | 1  | 2.8 | 0.6  |
| An07g07880 | similarity to ORFX ORF2689 polypeptide sequence SEQ ID NO:5378 from patent WO200058473-A2 - Homo sapiens                                   | 5  | 12 | 2.8 | 4.4  |
| An02g01750 | strong similarity to chaperone involved in mitochondrial protein import Mge1 - Saccharomyces cerevisiae                                    | 2  | 10 | 2.7 | 7.9  |
| An17g01530 | alcohol-dehydrogenase adhA from patent WO8704464-A - Aspergillus niger-                                                                    | 3  | 1  | 2.6 | 0.8  |
| An08g04240 | strong similarity to alternative NADH:ubiquinone reductase NDH2 - Yarrowia lipolytica                                                      | 5  | 33 | 2.5 | 10.7 |
| An07g07000 | strong similarity to mitochondrial m-AAA protease subunit Yta12 - Saccharomyces cerevisiae                                                 | 8  | 27 | 2.5 | 5.5  |
| An07g02770 | strong similarity to hypothetical protein YKL195w - Saccharomyces cerevisiae                                                               | 2  | 5  | 2.4 | 3.7  |
| An16g08740 | strong similarity to 17.8 kD subunit of NADH:ubiquinone reductase Nuo-17.8 - Neurospora crassa                                             | 1  | 7  | 2.3 | 7.9  |
| An04g00220 | strong similarity to methionine-N-acetyltransferase Nat2 - Saccharomyces cerevisiae                                                        | 2  | 4  | 2.3 | 2.8  |
| An07g09550 | strong similarity to mitochondrial ribosomal protein Nam9 - Saccharomyces cerevisiae                                                       | 3  | 5  | 2.1 | 2.3  |
| An06g01730 | strong similarity to mtRNA splice defect-suppressing mitochondrial carrier Mrs3 - Saccharomyces cerevisiae                                 | 2  | 4  | 2.0 | 2.5  |

|            |                                                                                                                                      |   |    |     |     |
|------------|--------------------------------------------------------------------------------------------------------------------------------------|---|----|-----|-----|
| An04g09030 | strong similarity to mitochondrial succinate-fumarate transporter Sfc1 - <i>Saccharomyces cerevisiae</i>                             | 2 | 8  | 2.0 | 4.7 |
| An02g06530 | strong similarity to protein required for dispersion of mitochondria cluA - <i>Dictyostelium discoideum</i>                          | 9 | 20 | 2.0 | 3.0 |
| 53140      | strong similarity to mitochondrial cytochrome b2, putative [ <i>Aspergillus flavus</i> NRRL3357]                                     | 3 | 4  | 1.9 | 1.7 |
| An07g09110 | similarity to monooxygenase VioC - <i>Chromobacterium violaceum</i>                                                                  | 3 | 4  | 1.8 | 1.6 |
| An01g13930 | similarity to succinate dehydrogenase - <i>Saccharomyces cerevisiae</i>                                                              | 1 | 7  | 1.8 | 6.1 |
| An12g00130 | strong similarity to mRNA processing protein of cytochrome c oxidase Mss51 - <i>Saccharomyces cerevisiae</i>                         | 3 | 6  | 1.7 | 2.2 |
| An16g04170 | strong similarity to acetolactate synthase protein from patent EP257993-A - <i>Saccharomyces cerevisiae</i> -                        | 4 | 5  | 1.7 | 1.4 |
| An04g00060 | strong similarity to 19.3 kD subunit of NADH:ubiquinone reductase - <i>Neurospora crassa</i>                                         | 1 | 6  | 1.7 | 5.1 |
| An05g00110 | strong similarity to hypothetical protein YNR020c - <i>Saccharomyces cerevisiae</i>                                                  | 1 | 8  | 1.6 | 6.5 |
| An01g06370 | strong similarity to hypothetical protein YKR065c - <i>Saccharomyces cerevisiae</i>                                                  | 1 | 5  | 1.6 | 4.0 |
| An04g04970 | strong similarity to Yta11 - <i>Saccharomyces cerevisiae</i>                                                                         | 4 | 28 | 1.5 | 6.4 |
| An15g00980 | strong similarity to maintaining mitochondrial morphology protein MMM1 - <i>Neurospora crassa</i>                                    | 2 | 4  | 1.3 | 1.7 |
| An07g03130 | strong similarity to mitochondrial cation transporter Mmt1 - <i>Saccharomyces cerevisiae</i>                                         | 2 | 10 | 1.3 | 3.9 |
| An18g05590 | strong similarity to mitochondrial carrier protein Ymc1 - <i>Saccharomyces cerevisiae</i>                                            | 1 | 6  | 1.3 | 3.9 |
| An08g04250 | strong similarity to dynamin-related protein msp1p - <i>Schizosaccharomyces pombe</i>                                                | 4 | 7  | 1.3 | 1.5 |
| An11g10070 | strong similarity to hypothetical protein Afu3g06270 - <i>Aspergillus fumigatus</i>                                                  | 1 | 5  | 1.2 | 3.1 |
| An01g10190 | similarity to mitochondrial tricarboxylate carrier - <i>Rattus sp.</i>                                                               | 1 | 7  | 1.1 | 3.7 |
| An12g07580 | strong similarity to acetylglutamate kinase/N-acetyl-gamma-glutamyl-phosphate reductase precursor arg-6 - <i>Neurospora crassa</i> - | 3 | 5  | 1.0 | 1.1 |
| An11g09350 | strong similarity to mitochondrial NADH dehydrogenase ndh64 - <i>Neurospora crassa</i>                                               | 2 | 9  | 0.9 | 2.4 |
| An04g08800 | strong similarity to mitochondrial carrier Leu5 - <i>Saccharomyces cerevisiae</i>                                                    | 1 | 3  | 0.9 | 1.5 |
| An02g04000 | strong similarity to pyruvate dehydrogenase kinase isoform 2 - <i>Zea mays</i>                                                       | 1 | 3  | 0.9 | 1.4 |
| An04g07060 | strong similarity to peptide ABC transporter protein Mdl1 - <i>Saccharomyces cerevisiae</i>                                          | 1 | 6  | 0.5 | 1.5 |
| An11g11230 | strong similarity to citrate transport protein Ctp1 - <i>Saccharomyces cerevisiae</i>                                                | 0 | 7  | 0.4 | 4.6 |
| An14g00810 | strong similarity to hypothetical protein EAA61688.1 - <i>Aspergillus nidulans</i>                                                   | 0 | 3  | 0.4 | 1.8 |
| An15g02490 | similarity to 3-isopropylmalate dehydrogenase leuB - <i>Sulfolobus sp.</i>                                                           | 0 | 3  | 0.4 | 1.7 |
| An01g06960 | strong similarity to hypothetical phosphatidyl synthase SPAC22A12.08c - <i>Schizosaccharomyces pombe</i>                             | 0 | 5  | 0.4 | 2.7 |
| An02g12070 | strong similarity to mitochondrial phosphate transport protein G7 - <i>Glycine max</i>                                               | 0 | 7  | 0.3 | 3.6 |
| An01g07190 | strong similarity to component of the translocase of mitochondrial inner membrane Tim54 - <i>Saccharomyces cerevisiae</i>            | 0 | 3  | 0.3 | 1.4 |
| An01g07200 | similarity to N-acetylglucosaminyltransferases chain p110 - <i>Rattus norvegicus</i>                                                 | 0 | 19 | 0.2 | 4.2 |
