# Supplementary material
Source: PubMed Central journal article supplement (PMC2897441)
Supplement: supp_76_13_4421__4.pdf [file supp_76_13_4421__4.pdf]

**SUPPLEMENTAL TABLE S4.** Proteins involved in quality control and glycosylation.

Bold characters: higher sequence similarity to mammalian proteins.

| <i>A. niger</i>   | <i>S. cerevisiae</i> | % Identity (E-value) | <i>H. sapiens</i> | % Identity (E-value) | Description                                           | NSAF.10 <sup>4</sup> |             |
|-------------------|----------------------|----------------------|-------------------|----------------------|-------------------------------------------------------|----------------------|-------------|
|                   |                      |                      |                   |                      |                                                       | Sorbitol             | Xylose      |
| An05g00140        | (Srp102)             | 46 (7e-12)           | (SRPB)            | 41 (2e-04)           | SRP receptor $\beta$ subunit                          | 25.6                 | 11.6        |
| An01g03820        | Sbh2                 | 68 (7e-22)           | SEC61B            | 60 (6e-10)           | Translocation to the ER (GEF)                         | 25.6                 | 7.8         |
| <b>An03g04340</b> | <b>Sec61</b>         | <b>79 (0.0)</b>      | <b>SEC61A1</b>    | <b>82 (0.0)</b>      | <b>Targeting to ER</b>                                | <b>22.1</b>          | <b>12.3</b> |
| An01g13070        | Sec63                | 46 (5e-53)           | SEC63             | 45 (5e-38)           | Targeting and import to the ER                        | 16.9                 | 14.8        |
| An02g01510        | Sec62                | 55 (8e-31)           | SEC62             | 48 (5e-18)           | Targeting and import to the ER                        | 14.3                 | 9.1         |
| An16g08830        | (Sec66)              | 50 (2e-16)           | no hits           | no hits              | Targeting and import to the ER                        | 19.8                 | 16.4        |
| An17g00090        | (Sec72)              | 41 (1e-05)           | (LONRF3)          | 44 (4e-04)           | Targeting and import to the ER                        | 4.7                  | 7.9         |
| An16g07390        | (Spc2)               | 47 (2e-11)           | (SPC2)            | 43 (0.065)           | Signal peptidase protein                              | 11.8                 | 9.1         |
| An02g14800        | Pdi1                 | 56 (4e-90)           | PDIA3             | 54 (2e-75)           | Protein disulfide isomerase PdiA                      | 75.6                 | 59          |
| <b>An18g02020</b> | <b>(Pdi1)</b>        | <b>60 (2e-18)</b>    | <b>(PDIA6)</b>    | <b>53 (7e-40)</b>    | <b>Protein disulfide isomerase TigA</b>               | <b>33</b>            | <b>25.9</b> |
| An01g04600        | (Mpd1)               | 54 (5e-33)           | (PDIA6)           | 58 (7e-24)           | Protein disulfide isomerase PrpA                      | 26.6                 | 26.2        |
| <b>An02g05890</b> | <b>(Mpd1)</b>        | <b>58 (3e-14)</b>    | <b>(TXNDC5)</b>   | <b>45 (5e-29)</b>    | <b>Protein disulfide isomerase</b>                    | <b>17.6</b>          | <b>28.5</b> |
| An16g07620        | (Ero1)               | 49 (2e-74)           | (ERO1LB)          | 50 (1e-59)           | Thiol-oxidase EroA                                    | 5                    | 5.6         |
| <b>An04g02020</b> | <b>Cpr1</b>          | <b>79 (1e-59)</b>    | <b>PPIB</b>       | <b>79 (2e-67)</b>    | <b>PPIase cyclophilin CypB</b>                        | <b>37.4</b>          | <b>41.3</b> |
| <b>An01g06670</b> | <b>Fpr2</b>          | <b>64 (4e-28)</b>    | <b>FKBP2</b>      | <b>60 (9e-29)</b>    | <b>PPIase FK506 binding protein</b>                   | <b>4.8</b>           | <b>4.7</b>  |
| An11g04180        | Kar2                 | 84 (0.0)             | HSPA5             | 83 (0.0)             | DnaK chaperone ATPase BipA                            | 71.8                 | 52.7        |
| <b>An01g08420</b> | <b>Cne1</b>          | <b>48 (2e-56)</b>    | <b>CANX</b>       | <b>66 (3e-116)</b>   | <b>Glycoprotein chaperone ClxA</b>                    | <b>42.4</b>          | <b>46.4</b> |
| An12g10590        | (Ecm10)              | 50 (0.030)           | (HSPA5)           | 52 (0.39)            | Unknown ER DnaK protein                               | 2.4                  | 2.4         |
| An05g00880        | Scj1                 | 55 (2e-69)           | DNAJA4            | 53 (8e-57)           | ER DnaJ co-chaperone                                  | 9.1                  | 7.6         |
| An12g00580        | (Scj1)               | 58 (3e-07)           | (DNAJB5)          | 57 (3e-07)           | ER DnaJ co-chaperone                                  | 6.8                  | 3.2         |
| An18g06470        | (Erj5)               | 46 (5e-15)           | (DNAJC1)          | 41 (1e-10)           | DnaJ-domain protein                                   | 6.2                  | 2.5         |
| <b>An01g13220</b> | <b>(Lhs1)</b>        | <b>52 (2e-50)</b>    | <b>(HYOU1)</b>    | <b>48 (2e-80)</b>    | <b>Nucleotide exchange factor LhsA</b>                | <b>20.2</b>          | <b>22.1</b> |
| An04g07440        | Shr3                 | 49 (1e-17)           | no hits           | no hits              | ER packaging chaperone                                | 26.4                 | 15.5        |
| <b>54765</b>      | <b>no hits</b>       | <b>no hits</b>       | <b>TTC35</b>      | <b>55 (5e-19)</b>    | <b>TTC35 protein</b>                                  | <b>6.5</b>           | <b>5.7</b>  |
| <b>An08g10400</b> | <b>no hits</b>       | <b>no hits</b>       | <b>SLC35A3</b>    | <b>59 (1e-45)</b>    | <b>UDP-GlcNAc/UDP-Gal transporter</b>                 | <b>1</b>             | <b>2.4</b>  |
| An17g02140        | Vrg4                 | 74 (1e-102)          | (SLC35D2)         | 44 (9e-11)           | GDP-Mannose transporter                               | 9.9                  | 11.6        |
| An14g03820        | Gal10                | 72 (2e-122)          | GALE              | 64 (6e-99)           | UDP-Glc 4-epimerase                                   | 9.5                  | 9.5         |
| An08g04450        | Gda1                 | 67 (2e-126)          | ENTPD6            | 47 (4e-45)           | Guanosine-diphosphatase                               | 9                    | 13.3        |
| An18g06820        | Gfa1                 | 78 (0.0)             | GFPT2             | 72 (0.0)             | Gln-Fru-6-P amidotransferase                          | 12.9                 | 7.4         |
| An04g04990        | Psa1                 | 84 (7e-156)          | GMPPB             | 79 (2e-130)          | Mannose-1-P guanyltransferase                         | 3.2                  | 1.7         |
| <b>An18g05170</b> | <b>Pcm1</b>          | <b>57 (5e-39)</b>    | <b>PGM3</b>       | <b>63 (9e-53)</b>    | <b>Phosphoglucomutase</b>                             | <b>3.1</b>           | <b>2.8</b>  |
| An12g00820        | Ugp1                 | 79 (0.0)             | UGP2              | 70 (1e-147)          | UGPase                                                | 23.2                 | 26.5        |
| An02g02980        | Die2                 | 42 (2e-36)           | ALG10B            | 44 (6e-29)           | $\alpha$ -1,2-Glucosyltransferase                     | 3.9                  | 2.1         |
| <b>An04g03130</b> | <b>no hits</b>       | <b>no hits</b>       | <b>MPDU1</b>      | <b>54 (1e-33)</b>    | <b>Man-P-Dol utilization protein</b>                  | <b>2.2</b>           | <b>4.5</b>  |
| <b>An16g04330</b> | <b>Dpm1</b>          | <b>50 (2e-24)</b>    | <b>DPM1</b>       | <b>80 (7e-92)</b>    | <b>Dol-P <math>\beta</math>-D-mannosyltransferase</b> | <b>26</b>            | <b>23.9</b> |
| <b>An08g07020</b> | <b>Alg9</b>          | <b>50 (1e-83)</b>    | <b>ALG9</b>       | <b>52 (1e-89)</b>    | <b><math>\alpha</math>-1,2-Mannosyltransferase</b>    | <b>3.7</b>           | <b>2.8</b>  |
| <b>An18g05910</b> | <b>Alg11</b>         | <b>56 (8e-68)</b>    | <b>ALG11</b>      | <b>59 (2e-94)</b>    | <b><math>\alpha</math>-1,2-Mannosyltransferase</b>    | <b>1.2</b>           | <b>1.8</b>  |
| An04g08820        | Alg8                 | 61 (2e-114)          | ALG8              | 58 (7e-102)          | $\alpha$ -1,3-Glucosyltransferase                     | 0.7                  | 1.7         |
| <b>An02g14560</b> | <b>(Ost1)</b>        | <b>48 (2e-45)</b>    | <b>(RPN1)</b>     | <b>47 (0.0)</b>      | <b>OT <math>\alpha</math> subunit OstA</b>            | <b>41.1</b>          | <b>35.7</b> |
| <b>An07g04190</b> | <b>(Wbp1)</b>        | <b>49 (4e-47)</b>    | <b>(DDOST)</b>    | <b>52 (2e-50)</b>    | <b>OT <math>\beta</math> subunit</b>                  | <b>42.3</b>          | <b>38</b>   |
| <b>An02g14930</b> | <b>(Ost3)</b>        | <b>42 (4e-19)</b>    | <b>(TUSC3)</b>    | <b>46 (4e-21)</b>    | <b>OT <math>\gamma</math> subunit</b>                 | <b>8.2</b>           | <b>15.3</b> |
| <b>An04g03495</b> | <b>(Swp1)</b>        | <b>47 (2e-11)</b>    | <b>(RPN2)</b>     | <b>52 (9e-14)</b>    | <b>OT <math>\delta</math> subunit</b>                 | <b>16.8</b>          | <b>21.7</b> |
| An16g08570        | Stt3                 | 78 (0.0)             | STT3B             | 71 (0.0)             | OT catalytic subunit                                  | 11.4                 | 15.7        |
| An15g01420        | Cwh41                | 55 (9e-146)          | MOGS              | 46 (5e-107)          | Processing $\alpha$ -glucosidase I                    | 13.8                 | 21          |
| <b>An09g05880</b> | <b>Rot2</b>          | <b>56 (0.0)</b>      | <b>GANAB</b>      | <b>56 (0.0)</b>      | <b>Glucosidase II <math>\alpha</math> subunit</b>     | <b>27.6</b>          | <b>28.9</b> |
| An13g00620        | (Gtb1)               | 43 (7e-17)           | (PRKCSH)          | 43 (2e-15)           | Glucosidase II $\beta$ subunit                        | 16.7                 | 12.9        |
| <b>An07g06430</b> | <b>(Kre5)</b>        | <b>40 (3e-26)</b>    | <b>UGGT1</b>      | <b>51 (0.0)</b>      | <b>UDP-Glc glucosyltransferase</b>                    | <b>9.1</b>           | <b>10</b>   |
| An06g01510        | (Ylr057w)            | 42 (4e-42)           | MAN1B1            | 55 (1e-26)           | $\alpha$ -1,2-Mannosidase                             | 5.5                  | 10.3        |
| An18g06220        | Mns1                 | 59 (2e-119)          | MAN1B1            | 60 (2e-103)          | $\alpha$ -1,2-Mannosidase                             | 2.9                  | 3.4         |
| An07g10350        | Pmt2                 | 67 (0.0)             | (POMT2)           | 53 (2e-128)          | O-Mannosyltransferase PmtA                            | 9.3                  | 12.5        |
| An11g09890        | Pmt1                 | 60 (0.0)             | (POMT2)           | 54 (1e-119)          | O-Mannosyltransferase                                 | 7.6                  | 4.9         |
| An16g08490        | Pmt4                 | 64 (0.0)             | (POMT1)           | 52 (3e-99)           | O-Mannosyltransferase                                 | 4.9                  | 6           |

|            |        |             |         |            |                                   |      |      |
|------------|--------|-------------|---------|------------|-----------------------------------|------|------|
| An03g01090 | (Hoc1) | 42 (1e-15)  | no hits | no hits    | $\alpha$ -1,6-Mannosyltransferase | 2.2  | 3.3  |
| An05g02320 | (Hoc1) | 44 (9e-12)  | no hits | no hits    | $\alpha$ -1,6-Mannosyltransferase | 1.6  | 5.6  |
| An07g04940 | Hoc1   | 55 (2e-64)  | no hits | no hits    | $\alpha$ -1,6-Mannosyltransferase | 1.1  | 2.7  |
| An12g07020 | (Hoc1) | 48 (3e-23)  | no hits | no hits    | $\alpha$ -1,6-Mannosyltransferase | 2.2  | 4.9  |
| An03g05010 | Mnn9   | 64 (3e-98)  | no hits | no hits    | MTC complex subunit               | 4.3  | 4.8  |
| An04g01260 | Anp1   | 65 (2e-82)  | no hits | no hits    | MTC complex subunit               | 15.5 | 21.7 |
| An15g06230 | Anp1   | 69 (2e-136) | no hits | no hits    | MTC complex subunit               | 3.4  | 4.2  |
| An03g02990 | (Gnt1) | 58 (1e-17)  | no hits | no hits    | GlcNAc-transferase                | 1    | 2.4  |
| An11g10260 | Gnt1   | 60 (4e-25)  | (GYG1)  | 46 (0.072) | GlcNAc-transferase                | 2.6  | 4.4  |
| An18g02170 | Ktr5   | 57 (8e-104) | no hits | no hits    | $\alpha$ -1,2-Mannosyltransferase | 8    | 16.4 |
| An02g09940 | Ktr1   | 64 (3e-85)  | no hits | no hits    | $\alpha$ -1,2-Mannosyltransferase | 12.1 | 13.4 |
| An14g03910 | Ktr1   | 70 (2e-124) | no hits | no hits    | $\alpha$ -1,2-Mannosyltransferase | 11   | 11.7 |
| An02g11720 | Ams1   | 63 (0.0)    | MAN2C1  | 60 (0.0)   | $\alpha$ -Mannosidase Msd2/MsdB   | 1.1  | 1.2  |
