# Supplementary material
Source: PubMed Central journal article supplement (PMC2897441)
Supplement: supp_76_13_4421__5.pdf [file supp_76_13_4421__5.pdf]

**SUPPLEMENTAL TABLE S5.** Proteins involved in protein sorting, vesicular transport and membrane fusion. Bold characters: higher sequence similarity to mammalian proteins.

| <i>A. niger</i>   | <i>S. cerevisiae</i> | % Identity (E-value) | <i>H. sapiens</i> | % Identity (E-value) | Description                           | NSAF 10 <sup>4</sup> |             |
|-------------------|----------------------|----------------------|-------------------|----------------------|---------------------------------------|----------------------|-------------|
|                   |                      |                      |                   |                      |                                       | Sorbitol             | Xylose      |
| An14g00900        | Mcd4                 | 60 (0.0)             | PIGN              | 57 (0.0)             | GPI anchor assembly                   | 4.1                  | 2.1         |
| <b>An05g02300</b> | <b>(Gpi12)</b>       | <b>46 (2e-17)</b>    | <b>(PIGL)</b>     | <b>45 (6e-24)</b>    | <b>GPI anchor assembly</b>            | <b>2.2</b>           | <b>14</b>   |
| An17g00780        | (Pbn1)               | 44 (3e-11)           | no hits           | no hits              | GPI Man-transferase subunit           | 1.8                  | 2.3         |
| An10g00480        | (Gpi11)              | 38 (0.002)           | no hits           | no hits              | Man-EthNH P-transferase               | 2.5                  | 2.4         |
| An01g13530        | Gpi8                 | 82 (4e-116)          | PIGK              | 75 (1e-95)           | GPI-transamidase complex              | 2.3                  | 0.7         |
| An07g09270        | (Gpi17)              | 43 (3e-34)           | (PIGS)            | 42 (9e-32)           | GPI-transamidase complex              | 1.1                  | 1.4         |
| An11g06770        | Gpi16                | 59 (9e-114)          | PIGT              | 46 (3e-77)           | GPI-transamidase complex              | 2                    | 1.7         |
| An18g05180        | (Per1)               | 50 (2e-42)           | (PGAP3)           | 51 (2e-33)           | Assists GPI-phospholipase             | 1.7                  | 2.7         |
| An16g03370        | Cwh43                | 60 (0.0)             | CWH43             | 46 (5e-84)           | Addition of ceramides to GPI          | 9.6                  | 8.4         |
| An04g02500        | Nmt1                 | 67 (2e-121)          | NMT2              | 64 (8e-109)          | N-myristoyl transferase               | 2.4                  | 2.4         |
| An05g00200        | (Akr1)               | 49 (1e-93)           | (ZDHHC17)         | 46 (1e-52)           | Palmitoyl transferase                 | 4.8                  | 7.5         |
| An03g03570        | (Tor2)               | 52 (0.017)           | no hits           | no hits              | C-methylation of prenylCys.           | 0.3                  | 2.6         |
| An02g08450        | Sec18                | 71 (0.0)             | NSF               | 69 (0.0)             | NsfA for release of Sec17             | 3.4                  | 4.3         |
| An02g01580        | Sec17                | 60 (4e-44)           | NAPB              | 62 (4e-43)           | SNAP for NSF binding                  | 6.6                  | 15.6        |
| An12g04710        | Vtc4                 | 65 (0.0)             | (XPR1)            | 47 (2e-08)           | VTC subunit                           | 7.9                  | 6.8         |
| An07g09800        | Vtc3                 | 52 (5e-133)          | (XPR1)            | 42 (3e-05)           | VTC subunit                           | 10.3                 | 9.2         |
| An09g04170        | Sly1                 | 57 (1e-126)          | SCFD1             | 55 (6e-119)          | SM protein, binds Sed5                | 1.3                  | 2.2         |
| An02g12980        | Sed5                 | 54 (3e-49)           | STX5              | 53 (2e-47)           | Qa.II type SNARE                      | 2.7                  | 0.8         |
| An08g01410        | Sft2                 | 60 (3e-37)           | SFT2D3            | 53 (9e-05)           | Qa type SNARE (putative)              | 4.2                  | 2.1         |
| An04g07020        | Tlg2                 | 52 (4e-34)           | STX16             | 51 (63-33)           | Qa.III.a type SNARE                   | 3.1                  | 3.6         |
| <b>An04g01530</b> | <b>(Pep12)</b>       | <b>49 (2e-20)</b>    | <b>(STX12)</b>    | <b>54 (2e-20)</b>    | <b>Qa.III.b type SNARE</b>            | <b>14.8</b>          | <b>16.8</b> |
| An12g01190        | (Sso2)               | 50 (5e-20)           | (STX2)            | 51 (3e-10)           | Qa.IV type SNARE                      | 2.1                  | 7.9         |
| An07g02170        | (Bos1)               | 47 (2e-14)           | (GOSR2)           | 59 (2e-10)           | Qb.II type SNARE                      | 4.8                  | 5.5         |
| An04g05980        | Vti1                 | 59 (2e-26)           | VTI1A             | 56 (5e-26)           | Qb.III.b type SNARE                   | 18                   | 19.7        |
| An08g02460        | Gos1                 | 58 (1e-33)           | GOSR1             | 51 (1e-24)           | Qb.II type SNARE                      | 4                    | 2           |
| An12g07570        | Snc2                 | 72 (3E-28)           | VAMP4             | 68 (5e-11)           | R.IV type SNARE                       | 6.7                  | 7.3         |
| <b>An08g07470</b> | <b>(Nyv1)</b>        | <b>60 (1e-11)</b>    | <b>(VAMP7)</b>    | <b>50 (2e-20)</b>    | <b>R.III type SNARE</b>               | <b>2.4</b>           | <b>6.4</b>  |
| An04g08480        | Ykt6                 | 72 (9e-60)           | YKT6              | 66 (2e-45)           | R.II tye SNARE                        | 8.6                  | 9.7         |
| An12g00800        | Tcb1                 | 50 (8e-157)          | no hits           | no hits              | Tricalbin                             | 6.9                  | 9.3         |
| An03g04940        | (Erv41)              | 47 (4e-36)           | (PTX1)            | 44 (4e-33)           | Erv41/46 complex                      | 7.5                  | 11.1        |
| An01g04320        | Erv46                | 56 (5e-79)           | ERGIC3            | 56 (3e-76)           | Erv41/46 complex                      | 12.5                 | 14.9        |
| <b>An15g01680</b> | <b>(Yif1)</b>        | <b>47 (1e-30)</b>    | <b>(YIF1A)</b>    | <b>54 (2e-34)</b>    | <b>COPII/Golgi fusion</b>             | <b>1.8</b>           | <b>2.8</b>  |
| <b>An01g04730</b> | <b>Sec23</b>         | <b>69 (0.0)</b>      | <b>SEC23A</b>     | <b>71 (0.0)</b>      | <b>Activator of GTPase</b>            | <b>9</b>             | <b>4.1</b>  |
| An08g10650        | Sec24                | 60 (0.0)             | SEC24B            | 59 (1e-150)          | Sec23/24 complex                      | 6.4                  | 6.6         |
| 225665            | Sed4                 | 37 (0.062)           | no hits           | no hits              | Regulator of SarA                     | 8.6                  | 8           |
| An02g01690        | Sec31                | 46 (9e-152)          | SEC31A            | 51 (1e-116)          | COPII coat                            | 0.7                  | 1.5         |
| An08g03960        | Erv29                | 67 (5e-55)           | SURF4             | 61 (3e-44)           | vesicle transport                     | 9.7                  | 12.4        |
| An04g08830        | (Emp47)              | 52 (1e-17)           | (LMAN1L)          | 40 (2e-09)           | vesicle transport                     | 17.9                 | 19.8        |
| An01g08870        | Erv25                | 69 (2e-53)           | TMED10            | 59 (1e-28)           | Erv25 p24 family                      | 16.7                 | 22.7        |
| An04g01780        | Erp1                 | 60 (1e-44)           | TMED9             | 56 (1e-33)           | Erp1 p24 family                       | 10.7                 | 13.6        |
| An09g05490        | Erp3                 | 52 (7e-26)           | TMED2             | 50 (4e-21)           | p24 family                            | 6                    | 12.5        |
| An08g03590        | Emp24                | 62 (6e-47)           | TMED2             | 55 (4e-29)           | Erv25/Erp1/Emp24                      | 12.2                 | 17.3        |
| An07g07830        | (Ted1)               | 42 (1e-50)           | no hits           | no hits              | Cargo exit from ER                    | 0.7                  | 1.1         |
| <b>An16g03320</b> | <b>Sfb3</b>          | <b>48 (7e-111)</b>   | <b>SEC24C</b>     | <b>53 (3e-130)</b>   | <b>Sorting of PmaA</b>                | <b>2.2</b>           | <b>1.5</b>  |
| <b>An07g07340</b> | <b>Erd2</b>          | <b>55 (2e-28)</b>    | <b>KDEL3</b>      | <b>59 (4e-31)</b>    | <b>(K/H)DEL binding</b>               | <b>2.7</b>           | <b>4</b>    |
| <b>An04g00670</b> | <b>(Get1)</b>        | <b>46 (3e-05)</b>    | <b>(WRB)</b>      | <b>51 (4e-08)</b>    | <b>GET subunit</b>                    | <b>6</b>             | <b>4.1</b>  |
| <b>An02g07090</b> | <b>Get3</b>          | <b>70 (1e-93)</b>    | <b>ASNA1</b>      | <b>72 (1e-95)</b>    | <b>GET subunit</b>                    | <b>3.4</b>           | <b>3.4</b>  |
| <b>An02g04250</b> | <b>(Uip5)</b>        | <b>43 (5e-11)</b>    | <b>LMAN2L</b>     | <b>56 (1e-40)</b>    | <b>ER export receptor</b>             | <b>18.1</b>          | <b>19.2</b> |
| <b>An02g02830</b> | <b>Rer1</b>          | <b>70 (1e-50)</b>    | <b>RER1</b>       | <b>79 (1e-57)</b>    | <b>Retrieves ER membrane proteins</b> | <b>18.6</b>          | <b>13.8</b> |
| <b>An07g06080</b> | <b>Hrr25</b>         | <b>87 (2e-134)</b>   | <b>CSNK1E</b>     | <b>78 (3e-143)</b>   | <b>Ser/Thr kinase</b>                 | <b>3.2</b>           | <b>3.7</b>  |
| An01g02500        | Trx1                 | 34 (1e-23)           | TXN               | 57 (1e-17)           | Thioredoxin                           | 22.9                 | 9.2         |
| An16g02460        | Cop1                 | 69 (0.0)             | COPA              | 67 (0.0)             | COPI $\alpha$ subunit                 | 9.8                  | 6.1         |

|            |         |             |           |             |                                      |      |      |
|------------|---------|-------------|-----------|-------------|--------------------------------------|------|------|
| An08g03270 | Sec26   | 69 (0.0)    | COPB1     | 69 (0.0)    | COPI $\beta$ subunit                 | 6.9  | 4.3  |
| An02g05870 | Sec27   | 72 (0.0)    | COPB2     | 75 (0.0)    | COPI $\beta'$ subunit                | 4    | 5.7  |
| An07g06030 | Sec21   | 63 (0.0)    | COPG2     | 61 (0.0)    | COPI $\gamma$ subunit protein        | 9.2  | 3.1  |
| An01g14250 | Ret2    | 56 (5e-78)  | ARCN1     | 57 (1e-96)  | COPI $\delta$ subunit                | 2.8  | 2.3  |
| An08g06330 | (Sec28) | 43 (3e-05)  | (COPE)    | 51 (2e-28)  | COPI $\epsilon$ subunit              | 3.6  | 4.7  |
| An01g04040 | Sar1    | 82 (1e-76)  | SAR1A     | 75 (1e-66)  | ARF GTPase SarA                      | 39.2 | 26.2 |
| An08g03690 | Arf2    | 89 (3e-81)  | ARF1      | 90 (2e-84)  | ARF GTPase                           | 5    | 7.4  |
| An08g04480 | Sey1    | 53 (5e-127) | no hits   | no hits     | Dynamamin GTPase                     | 20.2 | 19.9 |
| An03g06950 | Dnm1    | 69 (0.0)    | DNM1      | 61 (0.0)    | Dynamamin GTPase                     | 10.3 | 6.9  |
| An02g10450 | Vps1    | 77 (0.0)    | DNM1L     | 64 (3e-167) | Dynamamin GTPase                     | 9.5  | 13.6 |
| An11g00010 | (Vps1)  | 44 (2e-19)  | (MX2)     | 48 (3e-29)  | Dynamamin GTPase                     | 6.3  | 4.6  |
| An14g00010 | Sec4    | 81 (7e-65)  | RAB8A     | 79 (6e-72)  | Rab8 GTPase SrgA                     | 0.6  | 6.6  |
| An01g06060 | Ypt31   | 85 (7e-74)  | RAB11A    | 84 (1e-89)  | Rab11 GTPase                         | 21.6 | 24.4 |
| An09g06790 | Ypt1    | 82 (1e-82)  | RAB1A     | 87 (2e-92)  | Rab1 GTPase SrgB                     | 24   | 21.1 |
| An15g05740 | Ypt6    | 75 (7e-66)  | RAB6A     | 85 (2e-87)  | Rab6 GTPase SrgC                     | 20.5 | 15.1 |
| An04g02470 | Vps21   | 69 (2e-58)  | RAB5C     | 73 (6e-67)  | Rab5 GTPase                          | 0.6  | 7    |
| An02g06400 | Vps21   | 62 (8e-67)  | RAB5B     | 59 (1e-53)  | Rab5 GTPase                          | 2.5  | 5.9  |
| An06g02180 | no hits | no hits     | (C8orf80) | 48 (0.001)  | Ras GTPase                           | 1.1  | 0.6  |
| An01g02320 | Ras2    | 82 (2e-65)  | KRAS      | 81 (6e-59)  | Ras GTPase RasA                      | 5.5  | 12.3 |
| An18g05980 | Rho1    | 90 (6e-85)  | RHOA      | 81 (8e-79)  | Ras GTPase RhoA                      | 33   | 61.2 |
| An18g02490 | (Gea2)  | 49 (1e-149) | GBF1      | 54 (5e-74)  | GEF for ARFs                         | 2.3  | 0.4  |
| An07g02190 | Sec7    | 57 (0.0)    | ARGEF2    | 52 (0.0)    | GEF HypB for ARFs                    | 0.2  | 0.6  |
| An18g06440 | Yip3    | 73 (4e-43)  | RABAC1    | 54 (6e-13)  | Interacts with Rab GTPases           | 12.8 | 16.2 |
| An04g09250 | Mvp1    | 54 (2e-58)  | SNX8      | 49 (3e-29)  | PtdIns-3-P binding protein           | 2.6  | 7.6  |
| An03g06880 | Pep1    | 51 (7e-175) | no hits   | no hits     | Sorting receptor vacuolar hydrolases | 2.6  | 7.9  |
| An18g03490 | (Mr11)  | 53 (2e-18)  | (M6PR)    | 42 (3e-09)  | Sorting receptor vacuolar hydrolases | 2    | 2.5  |
| An18g03980 | Vps70   | 49 (3e-104) | FOLH1     | 52 (1e-95)  | Vacuolar protein sorting             | 1.5  | 1.8  |
| An14g05020 | Vac8    | 79 (0.0)    | no hits   | no hits     | Cytoplasm to vacuole targeting       | 3.4  | 2.3  |
| An16g04270 | Vps35   | 76 (5e-90)  | VPS35     | 59 (3e-92)  | Retromer coat                        | 11.3 | 9.5  |
| An01g07320 | Pep8    | 55 (1e-76)  | VPS26B    | 75 (4e-109) | Retromer coat                        | 9.2  | 4.4  |
| An08g01030 | Vps29   | 61 (4e-31)  | VPS29     | 64 (2e-46)  | Retromer coat                        | 10   | 5.1  |
| An01g08400 | Vps5    | 51 (1e-65)  | SNX1      | 54 (2e-58)  | Retromer coat                        | 2.5  | 0.5  |
| An12g04500 | Drs2    | 71 (0.0)    | ATP8A1    | 66 (0.0)    | Flippase                             | 0.1  | 0.7  |
| An15g01510 | Neo1    | 67 (2e-96)  | OSBPL9    | 45 (1e-36)  | Flippase                             | 0.5  | 1.7  |
| An02g07570 | Kes1    | 72 (0.0)    | ATP9B     | 66 (0.0)    | Oxysterol binding protein            | 4.1  | 2    |
| An04g02070 | Chc1    | 73 (0.0)    | CLTC      | 75 (0.0)    | Clathrin heavy chain                 | 31.4 | 15   |
| An16g02490 | Apl2    | 58 (1e-146) | AP2B1     | 69 (0.0)    | $\beta$ -Adaptin: AP-1 complex       | 2.6  | 0.8  |
| An01g02600 | Apl4    | 54 (4e-113) | AP1G1     | 63 (0.0)    | $\gamma$ -Adaptin: AP-1 complex      | 2.6  | 1.4  |
| An07g03200 | Apm1    | 72 (6e-154) | AP1M1     | 83 (5e-176) | $\mu$ -Like subunit: AP-1 complex    | 2.8  | 1.5  |
| An07g08220 | Ent3    | 75 (4e-61)  | CLINT1    | 68 (8E-41)  | Epsin-like domain protein            | 2.2  | 0.5  |
| An02g08820 | (Bud7)  | 46 (5e-69)  | no hits   | no hits     | Golgi cargo export                   | 5.7  | 1.7  |
| An02g03120 | Gdi1    | 75 (2e-154) | GDI1      | 70 (8e-132) | GDP dissociation inhibitor           | 1.4  | 3.7  |
| An01g08590 | (Tvp38) | 57 (1e-29)  | (TMEM64)  | 45 (8e-08)  | Asymmetric localization of Kar9      | 2.7  | 3.4  |
| An17g01420 | Yop1    | 56 (7e-27)  | REEP5     | 55 (2e-21)  | ER tubular morphology                | 56.2 | 40   |
| An08g08600 | No Hits | no hits     | no hits   | no hits     | Reticulon-like protein               | 11.6 | 9.7  |
| An08g01610 | Ola1    | 80 (6e-154) | OLA1      | 67 (6e-108) | P-loop ATPase                        | 14.2 | 8    |
| An02g05210 | no hits | no hits     | (ANXA7)   | 50 (1e-48)  | Annexin AnxC3.1                      | 1.4  | 1.4  |
| An01g12810 | (Yet3)  | 52 (4e-19)  | no hits   | no hits     | Invertase secretion in yeast         | 34.6 | 20.7 |
| An01g13390 | (Atg27) | 46 (0.087)  | no hits   | no hits     | Autophagy                            | 0.3  | 3.1  |
| An09g06580 | (Bre5)  | 45 (1e-08)  | (G3BP1)   | 42 (3e-23)  | Ras-GTPase-activating protein        | 3.6  | 2.2  |
| An14g00900 | Mcd4    | 60 (0.0)    | PIGN      | 57 (0.0)    | GPI anchor assembly                  | 4.1  | 2.1  |
| An05g02300 | (Gpi12) | 46 (2e-17)  | (PIGL)    | 45 (6e-24)  | GPI anchor assembly                  | 2.2  | 14   |
| An17g00780 | (Pbn1)  | 44 (3e-11)  | no hits   | no hits     | GPI Man-transferase subunit          | 1.8  | 2.3  |
| An10g00480 | (Gpi11) | 38 (0.002)  | no hits   | no hits     | Man-EthNH P-transferase              | 2.5  | 2.4  |
