# Supplementary material
Source: PubMed Central journal article supplement (PMC2897441)
Supplement: supp_76_13_4421__6.pdf [file supp_76_13_4421__6.pdf]

**SUPPLEMENTAL TABLE S6.** Proteins involved in cytoskeleton integrity, intracellular motility, protein folding in the cytoplasm, polarized growth, and cytokinesis. Bold characters: higher sequence similarity to mammalian proteins.

| <i>A. niger</i>   | <i>S. cerevisiae</i> | % Identity<br>(E-value) | <i>H. sapiens</i> | % Identity<br>(E-value) | Description                                         | NSAF.10 <sup>4</sup> |             |
|-------------------|----------------------|-------------------------|-------------------|-------------------------|-----------------------------------------------------|----------------------|-------------|
|                   |                      |                         |                   |                         |                                                     | Sorbitol             | Xylose      |
| An07g10420        | Cdc50                | 67 (3e-97)              | TMEM30B           | 50 (1e-47)              | Endosomal protein: actin patch                      | 2.9                  | 4.7         |
| An17g01945        | Rvs161               | 73 (1e-84)              | (AMPH)            | 46 (3e-18)              | Amphiphysin protein: actin polarization             | 7.5                  | 3.8         |
| An14g04160        | Cof1                 | 61 (5e-26)              | CFL1              | 51 (6e-12)              | Cofilin: actin filament depolarization              | 5.9                  | 2.9         |
| An11g10320        | Sla2                 | 71 (5e-88)              | (HIP1R)           | 45 (6e-68)              | Actin linking to clathrin                           | 1.2                  | 2.2         |
| 202202            | Sac6                 | 80 (0.0)                | PLS3              | 60 (2e-126)             | Actin-bundling protein                              | 14.3                 | 5.5         |
| An18g03200        | Arp3                 | 81 (0.0)                | ACTR3             | 71 (2e-142)             | Arp2/3 complex                                      | 4.4                  | 3.9         |
| An08g06400        | Arp2                 | 86 (9e-151)             | ACTR2             | 82 (1e-136)             | Arp2/3 complex                                      | 1.1                  | 2.4         |
| <b>An01g05510</b> | <b>Arc35</b>         | <b>60 (5e-59)</b>       | <b>ARPC2</b>      | <b>64 (1e-74)</b>       | <b>Structural, ARP2/3 complex</b>                   | <b>5.3</b>           | <b>5.9</b>  |
| An16g01570        | Arc18                | 63 (6e-45)              | ARPC3             | 60 (1e-39)              | Structural, ARP2/3 complex                          | 6.2                  | 6.2         |
| <b>An04g01830</b> | <b>(Mdm20)</b>       | <b>43 (2e-06)</b>       | <b>(C12orf30)</b> | <b>38 (8e-21)</b>       | <b>N-terminal acetyltransferase</b>                 | <b>1.2</b>           | <b>2.4</b>  |
| An02g02230        | Lsb6                 | 52 (2e-94)              | PI4K2B            | 54 (2e-70)              | PtdIns 4-kinase: actin polymerization               | 1.6                  | 5           |
| An15g00560        | Act1                 | 97 (0.0)                | ACTG1             | 96 (0.0)                | Actin ActA: cell polarity                           | 53.8                 | 42.1        |
| <b>An07g01640</b> | <b>Mlc1</b>          | <b>59 (3e-23)</b>       | <b>CALML3</b>     | <b>63 (5e-28)</b>       | <b>Myosin light chain</b>                           | <b>10</b>            | <b>3.2</b>  |
| An17g02290        | Myo2                 | 64 (0.0)                | MYO5A             | 61 (0.0)                | Myosin motor                                        | 0.4                  | 0.5         |
| <b>An08g06130</b> | <b>Gpa2</b>          | <b>63 (2e-80)</b>       | <b>GNAI1</b>      | <b>70 (5e-113)</b>      | <b>FadA: proliferation</b>                          | <b>1.1</b>           | <b>4.3</b>  |
| An01g09520        | Slt2                 | 81 (6e-152)             | MAPK7             | 63 (2e-93)              | MAP kinase: polarized growth                        | 4                    | 2.8         |
| An18g06270        | Bmh2                 | 85 (7e-102)             | YWHAE             | 84 (3e-101)             | Similar to ArtA: exocytosis                         | 30.1                 | 28.8        |
| An07g07760        | Bmh1                 | 82 (3e-109)             | YWHAE             | 89 (2e-106)             | Similar to ArtA: exocytosis                         | 30.5                 | 29.5        |
| An06g01200        | Emp70                | 61 (6E-157)             | TM9SF2            | 60 (3e-141)             | Endosomal: filamentous growth                       | 0.6                  | 2.7         |
| An18g06050        | Yck2                 | 81 (7e-137)             | CSNK1G2           | 70 (9e-108)             | Ser/Thr kinase: septin assembly                     | 2.1                  | 2.4         |
| An08g00310        | Cdc10                | 79 (1e-108)             | SEPT9             | 73 (8e-93)              | Septin family protein AspD                          | 7.1                  | 9.1         |
| An07g05110        | Cdc11                | 65 (1e-99)              | SEPT7             | 63 (6e-69)              | Septin ring protein AspA                            | 4.5                  | 7.9         |
| An09g05260        | Cdc12                | 72 (1e-120)             | SEPT7             | 58 (2e-77)              | Septin ring protein                                 | 3.1                  | 4           |
| An02g07690        | Bim1                 | 55 (4e-51)              | MAPRE1            | 57 (3e-46)              | Structural: cortical microtubule capture            | 10.1                 | 7.7         |
| <b>An08g10490</b> | <b>Stu2</b>          | <b>45 (8e-62)</b>       | <b>CKAP5</b>      | <b>54 (8e-83)</b>       | <b>Structural: microtule dynamics</b>               | <b>0.4</b>           | <b>0.9</b>  |
| <b>An01g05650</b> | <b>Tub3</b>          | <b>86 (0.0)</b>         | <b>TUBA1C</b>     | <b>89 (0.0)</b>         | <b><math>\alpha</math>-tubulin TubA</b>             | <b>18.9</b>          | <b>15.5</b> |
| <b>An08g03190</b> | <b>Tub2</b>          | <b>90 (0.0)</b>         | <b>TUBB2B</b>     | <b>94 (0.0)</b>         | <b><math>\beta</math>-tubulin TubB</b>              | <b>34.1</b>          | <b>29.3</b> |
| An01g06480        | Cct2                 | 86 (0.0)                | CCT2              | 82 (0.0)                | Cct ring complex subunit $\beta$                    | 1.2                  | 1.2         |
| <b>An02g12750</b> | <b>Cct4</b>          | <b>83 (0.0)</b>         | <b>CCT4</b>       | <b>83 (0.0)</b>         | <b>Cct ring complex subunit <math>\delta</math></b> | <b>2.2</b>           | <b>1.2</b>  |
| An18g05770        | Cct7                 | 79 (0.0)                | CCT7              | 77 (0.0)                | Cct ring complex subunit $\eta$                     | 0.2                  | 1           |
| An09g06590        | Hsc82                | 87 (0.0)                | HSP90AA1          | 80 (0.0)                | Hsp90 chaperone SspB                                | 46.9                 | 38.7        |
| An08g05300        | Sse2                 | 68 (0.0)                | HSPA4             | 59 (2e-158)             | Hsp90 chaperone complex                             | 6.4                  | 12.3        |
| An07g09990        | Ssa4                 | 90 (0.0)                | HSPA8             | 89 (0.0)                | Hsp70 protein: SRP-dependent targeting              | 72.5                 | 40.1        |
| An16g09260        | Ssb2                 | 89 (0.0)                | HSPA2             | 74 (0.0)                | Hsp70 protein HscA                                  | 11.2                 | 11.3        |
| An04g05270        | Aha1                 | 56 (2e-63)              | AHSA1             | 48 (3e-43)              | Co-chaperone: activator of Hsp82                    | 8.4                  | 4.7         |
| An12g00790        | Sti1                 | 67 (2e-163)             | STIP1             | 57 (3e-109)             | Hsp90 co-chaperone                                  | 2.3                  | 1.9         |
| An14g01560        | Zuo1                 | 63 (1e-79)              | DNAJC2            | 60 (1e-61)              | DnaJ protein                                        | 1.5                  | 3.8         |
| <b>An07g08300</b> | <b>Cpr1</b>          | <b>71 (7e-52)</b>       | <b>PPIA</b>       | <b>70 (5e-53)</b>       | <b>PPIase cyclophilin CypA</b>                      | <b>65.1</b>          | <b>32.7</b> |
| <b>An07g05920</b> | <b>Cpr6</b>          | <b>59 (2e-80)</b>       | <b>PPID</b>       | <b>62 (5e-89)</b>       | <b>PPIase cyclophilin CypD</b>                      | <b>6.6</b>           | <b>3.6</b>  |
| An08g01640        | Sgt2                 | 55 (6e-48)              | SGTA              | 49 (8e-32)              | TTC protein                                         | 2.7                  | 0.8         |
| An07g04570        | (Hyp2)               | 51 (8e-11)              | (EIF5A2)          | 53 (3e-08)              | HexA protein: Woronin body                          | 50                   | 28          |
| An13g01220        | Ynl320w              | 49 (4e-30)              | ABHD13            | 53 (4e-29)              | Suppressor of Bud 5                                 | 6.7                  | 5.9         |
