# Supplementary material
Source: PubMed Central journal article supplement (PMC2897441)
Supplement: supp_76_13_4421__7.pdf [file supp_76_13_4421__7.pdf]

**SUPPLEMENTAL TABLE S7.** Proteins involved in ER stress: UPR and ERAD. Bold characters: higher sequence similarity to mammalian proteins.

| <i>A. niger</i>   | <i>S. cerevisiae</i> | % Identity (E-value) | <i>H. sapiens</i> | % Identity (E-value) | Description                                           | NSAF 10 <sup>4</sup> |             |
|-------------------|----------------------|----------------------|-------------------|----------------------|-------------------------------------------------------|----------------------|-------------|
|                   |                      |                      |                   |                      |                                                       | Sorbitol             | Xylose      |
| An08g00830        | Ptc2                 | 67 (2e-81)           | PPM1A             | 55 (2e-50)           | Ser/Thr phosphatase                                   | 2.1                  | 2.8         |
| An03g02770        | Dcr2                 | 55 (3e-62)           | no hits           | no hits              | Phosphoesterase: UPR downregulation                   | 1.7                  | 1.8         |
| An08g01480        | Trl1                 | 55 (9e-145)          | no hits           | no hits              | tRNA ligase required for tRNA splicing                | 0.2                  | 1.2         |
| <b>An04g01720</b> | <b>Hlj1</b>          | <b>52 (1e-26)</b>    | <b>DNAJB12</b>    | <b>48 (2e-39)</b>    | <b>ERAD of membrane substrates</b>                    | <b>7</b>             | <b>8.4</b>  |
| An01g04280        | Ydj1                 | 69 (2e-120)          | DNAJA1            | 62 (7e-94)           | Chaperone for protein translocation                   | 4.1                  | 2.8         |
| <b>An16g08470</b> | <b>(Yos9)</b>        | <b>48 (1e-10)</b>    | <b>OS9</b>        | <b>40 (9e-17)</b>    | <b>HRD ligase</b>                                     | <b>5.4</b>           | <b>3.4</b>  |
| <b>An01g12720</b> | <b>(Hrd3)</b>        | <b>43 (3e-39)</b>    | <b>SEL1L2</b>     | <b>52 (3e-75)</b>    | <b>HRD complex subunit</b>                            | <b>3.2</b>           | <b>2.2</b>  |
| An04g09170        | Cdc48                | 88 (0.0)             | VCP               | 87 (0.0)             | Retrotranslocation of Ub-proteins                     | 1.4                  | 21          |
| An01g02880        | Rpl40a               | 100 (4e-69)          | UBA52             | 93 (6e-63)           | Fusion protein, precursor of Ub                       | 7.1                  | 12          |
| <b>An02g07010</b> | <b>Rps31</b>         | <b>91 (1e-57)</b>    | <b>RPS27A</b>     | <b>86 (7e-63)</b>    | <b>Fusion protein, precursor of Ub</b>                | <b>0.8</b>           | <b>5.3</b>  |
| An09g05480        | Ubp15                | 50 (4e-174)          | USP7              | 53 (2e-165)          | Ub-specific protease                                  | 3.5                  | 3.7         |
| An15g06020        | Uba1                 | 77 (0.0)             | UBA1              | 72 (0.0)             | Ub activating enzyme                                  | 3.6                  | 5.1         |
| An04g01730        | Ufd2                 | 52 (3e-134)          | UBE4B             | 49 (2e-103)          | Ub-Ub ligase                                          | 4.5                  | 1.8         |
| <b>An02g06300</b> | <b>Vps70</b>         | <b>47 (5e-53)</b>    | <b>FOLH1</b>      | <b>50 (1e-85)</b>    | <b>Proteolysis</b>                                    | <b>0.1</b>           | <b>0.9</b>  |
| <b>An11g03970</b> | <b>(Yta12)</b>       | <b>44 (5e-06)</b>    | <b>(SPG7)</b>     | <b>47 (2e-07)</b>    | <b>Proteolysis</b>                                    | <b>5</b>             | <b>4.1</b>  |
| <b>An11g11250</b> | <b>Jem1</b>          | <b>53 (7e-14)</b>    | <b>DNAJC3</b>     | <b>50 (7e-61)</b>    | <b>Degradation of substrates (putative)</b>           | <b>5.9</b>           | <b>5.2</b>  |
| An14g00180        | Rpt6                 | 88 (4e-179)          | PSMC5             | 87 (8e-168)          | 19S RP proteasome ATPase                              | 2.3                  | 3           |
| An18g06230        | Rpt4                 | 85 (3e-170)          | PSMC6             | 88 (1e-169)          | 19S RP proteasome ATPase                              | 3.6                  | 2.5         |
| An18g05230        | Rpt5                 | 88 (0.0)             | PSMC3             | 86 (4e-179)          | 19S RP proteasome ATPase                              | 2.5                  | 2.1         |
| An07g10110        | Rpn8                 | 77 (8e-108)          | PSMD7             | 74 (2e-90)           | 19S RP proteasome ATPase                              | 4                    | 5.3         |
| <b>An11g09690</b> | <b>Rpn5</b>          | <b>66 (1e-109)</b>   | <b>PSMD12</b>     | <b>64 (4e-115)</b>   | <b>19S RP proteasome ATPase</b>                       | <b>8.3</b>           | <b>5</b>    |
| <b>An11g10380</b> | <b>Rpn3</b>          | <b>57 (4e-85)</b>    | <b>PSMD3</b>      | <b>65 (5e-114)</b>   | <b>19S RP proteasome ATPase</b>                       | <b>3</b>             | <b>1.3</b>  |
| An08g10710        | Rpn9                 | 56 (1e-64)           | PSMD13            | 56 (3e-60)           | 19S RP proteasome ATPase                              | 3.8                  | 2.1         |
| <b>An18g05070</b> | <b>Rpn6</b>          | <b>69 (8e-102)</b>   | <b>PSMD11</b>     | <b>69 (3e-110)</b>   | <b>19S RP proteasome ATPase</b>                       | <b>11.4</b>          | <b>7</b>    |
| An16g02210        | Rpn12                | 52 (7e-32)           | PSMD8             | 53 (5e-28)           | 19S RP proteasome ATPase                              | 5.1                  | 2.9         |
| <b>An18g03010</b> | <b>Rpn1</b>          | <b>64 (3e-146)</b>   | <b>PSMD2</b>      | <b>71 (0.0)</b>      | <b>19S RP proteasome ATPase</b>                       | <b>7.9</b>           | <b>7.3</b>  |
| <b>An04g03270</b> | <b>Rpn2</b>          | <b>59 (7e-178)</b>   | <b>PSMD1</b>      | <b>59 (0.0)</b>      | <b>19S RP proteasome ATPase</b>                       | <b>1.5</b>           | <b>2.3</b>  |
| An02g07040        | Scl1                 | 75 (4e-81)           | PSMA6             | 76 (2e-79)           | 20S CP proteasomal $\alpha$ subunit                   | 1.6                  | 12.2        |
| An07g02010        | Pre8                 | 76 (1e-99)           | PSMA2             | 63 (5e-71)           | 20S CP proteasomal $\alpha$ subunit                   | 3.3                  | 15.2        |
| An11g06720        | Pre9                 | 80 (2e-93)           | PSMA4             | 77 (1e-82)           | 20S CP proteasomal $\alpha$ subunit                   | 0.5                  | 9.6         |
| An02g10790        | Pre6                 | 86 (8e-102)          | PSMA7             | 82 (3e-83)           | 20S CP proteasomal $\alpha$ subunit                   | 0.5                  | 11          |
| An02g03400        | Pup2                 | 83 (7e-101)          | PSMA5             | 78 (3e-87)           | 20S CP proteasomal $\alpha$ subunit                   | 0.5                  | 7.7         |
| <b>An15g00510</b> | <b>Pre5</b>          | <b>72 (2e-73)</b>    | <b>PSMA1</b>      | <b>67 (3e-77)</b>    | <b>20S CP proteasomal <math>\alpha</math> subunit</b> | <b>0.5</b>           | <b>14.8</b> |
| An18g06800        | Pre10                | 77 (3e-89)           | PSMA3             | 72 (5e-79)           | 20S CP proteasomal $\alpha$ subunit                   | 3.3                  | 15.5        |
| An13g01210        | Pre3                 | 87 (5e-80)           | PSMB6             | 76 (1e-65)           | 20S CP proteasomal $\beta$ subunit                    | 4.6                  | 10.4        |
| An11g04620        | Pup1                 | 79 (1e-96)           | PSMB7             | 74 (2e-84)           | 20S CP proteasomal $\beta$ subunit                    | 0.5                  | 3.6         |
| An04g01800        | Pup3                 | 84 (2e-87)           | PSMB3             | 74 (7e-66)           | 20S CP proteasomal $\beta$ subunit                    | 3.2                  | 6.6         |
| An04g01870        | Pre1                 | 79 (2e-67)           | PSMB2             | 66 (1e-40)           | 20S CP proteasomal $\beta$ subunit                    | 0.6                  | 4.9         |
| An11g01760        | Pre2                 | 75 (1e-92)           | PSMB5             | 70 (7e-59)           | 20S CP proteasomal $\beta$ subunit                    | 1                    | 4.5         |
| An18g06700        | Pre7                 | 71 (2e-77)           | PSMB1             | 61 (5e-51)           | 20S CP proteasomal $\beta$ subunit                    | 0.5                  | 21.9        |
| An18g06680        | Pre4                 | 62 (2e-64)           | PSMB4             | 65 (3e-53)           | 20S CP proteasomal $\beta$ subunit                    | 2.5                  | 5.9         |
| An04g05320        | Blm10                | 40 (6e-90)           | PSME4             | 42 (5e-65)           | Proteasome regulator                                  | 0.5                  | 1.8         |
| <b>An07g01470</b> | <b>Ddi1</b>          | <b>55 (2e-56)</b>    | <b>DDI1</b>       | <b>68 (5e-60)</b>    | <b>Ub-dependent protein catabolism</b>                | <b>4.4</b>           | <b>0.8</b>  |
| <b>An17g02180</b> | <b>Dfm1</b>          | <b>47 (1e-07)</b>    | <b>DERL1</b>      | <b>48 (2e-17)</b>    | <b>Derlin-like protein</b>                            | <b>3.6</b>           | <b>6</b>    |
| An01g12370        | (Ubx3)               | 53 (7e-35)           | (FAF2)            | 52 (4e-28)           | Ub activator domain protein                           | 5.2                  | 5.3         |
